# Supplementary material for: Red-Fleshed Apple Anthocyanin Extracts Attenuate Male Reproductive System Dysfunction Caused by Busulfan in Mice
Source: Front Nutr. 2021 Jun 23;8:632483. doi: 10.3389/fnut.2021.632483 (PMC8268157; doi:10.3389/fnut.2021.632483)
Supplement: Supplementary Table 1 — Number of significantly different metabolites detected in PBA0 vs. control, PBA.1 vs. control, PBA1 vs. control, and PBA5 vs. control, respectively. [file Table_1.XLSX]

## Sheet: PBA0_Control
ID	m/z	Retention time (min)	Ion mode	Metabolites	Compound ID	Super Class	Class	Sub Class	Adducts	Formula	Score	Fragmentation Score	Mass Error (ppm)	VIP	P-value	adj.P-value	log2(FC)	FC	average(PBA0)	average(Control)	PBA0-1	PBA0-2	PBA0-3	PBA0-4	PBA0-5	PBA0-6	PBA0-7	PBA0-8	PBA0-9	PBA0-10	Control-1	Control-2	Control-3	Control-4	Control-5	Control-6	Control-7	Control-8	Control-9	Control-10
9.21_453.2857n	452.278	9.20877	neg	LysoPE(16:0/0:0)	HMDB0011503	Lipids and lipid-like molecules	Glycerophospholipids	Glycerophosphoethanolamines	M-H, 2M-H	C21H44NO7P	58.2	93.3	0.276365	5.516	0.00117181	0.0442571	0.346479	1.27145	1.23588e+06	972018	1.50813e+06	1.37305e+06	1.16683e+06	1.34729e+06	1.27122e+06	969319	1.08136e+06	1.37329e+06	1.17904e+06	1.08924e+06	968777	1.00354e+06	903646	1.04981e+06	919357	1.18645e+06	1.08907e+06	665650	1.01494e+06	918941
9.46_526.3515m/z	526.352	9.46047	neg	PC(O-16:0/0:0)	LMGP01060010	Lipids and lipid-like molecules	Glycerophospholipids	Glycerophosphocholines	M+FA-H	C24H52NO6P	57.4	92.4	0.165412	2.65287	0.00583317	0.11847	0.334638	1.26106	336117	266535	345763	397865	390591	318334	350197	281884	355600	358943	274054	287941	274447	257792	255298	312991	253398	346156	283508	133053	277252	271456
9.68_552.3674m/z	552.367	9.6792	neg	LysoPC(P-18:0)	HMDB0013122	Lipids and lipid-like molecules	Glycerophospholipids	Glycerophosphocholines	M+FA-H	C26H54NO6P	57.1	92.4	0.663508	1.82181	0.0489184	0.368466	0.293312	1.22545	225783	184245	238047	280776	264438	183791	196343	239403	205202	267932	197410	184493	144989	174518	172355	156351	172225	225810	260150	113212	157084	265759
7.69_488.3503n	471.347	7.69172	pos	Glyyunnansapogenin B	HMDB0036639	Lipids and lipid-like molecules	Prenol lipids	Triterpenoids	M+H-H2O, M+H	C30H48O5	56.9	90	0.31864	1.66692	0.045736	0.357002	-1.68381	0.311259	10573.8	33971	7213.65	12259.1	1705.16	4915.68	3944.71	5358.47	29075.1	26495.9	1776.52	12993.6	109774	43383.9	29783	69280.2	31497.5	9608.04	15604.5	3136.69	17150.8	10491.6
8.82_482.3238m/z	482.324	8.81952	pos	LysoPC(15:0)	HMDB0010381	Lipids and lipid-like molecules	Glycerophospholipids	Glycerophosphocholines	M+H	C23H48NO7P	56.9	87.2	-0.599651	4.66677	0.0154835	0.203958	0.312425	1.24179	1.15275e+06	928293	947569	1.29162e+06	991972	1.1904e+06	1.08992e+06	1.43055e+06	1.09264e+06	1.68134e+06	861487	949976	873896	997274	825405	968901	872355	1.0772e+06	1.00151e+06	891747	894308	880324
1.08_145.0133m/z	145.013	1.0832	neg	Oxoglutaric acid	119	Organic acids and derivatives	Keto acids and derivatives	Gamma-keto acids and derivatives	M-H	C5H6O5	56.4	92.7	-6.30986	1.04129	0.0312461	0.301706	-0.838411	0.559259	19018.4	34006.4	9540.25	5639.16	827.426	34612.2	20058.4	33159	4906.79	30957.7	16540.1	33942.9	33563	24230.7	29987.7	59156.4	32917.2	62970.8	32401.2	23157.9	25212.6	16466.6
14.28_885.5498m/z	885.55	14.2779	neg	PI(18:0/20:4(5Z,8Z,11Z,14Z))	HMDB0009815	Lipids and lipid-like molecules	Glycerophospholipids	Glycerophosphoinositols	M-H	C47H83O13P	56.4	86.6	-0.0401436	11.0367	0.027783	0.282564	0.528074	1.442	5.77416e+06	4.00426e+06	4.40617e+06	6.60134e+06	5.89315e+06	6.6522e+06	8.37151e+06	6.17748e+06	5.59154e+06	2.95094e+06	5.43224e+06	5.66499e+06	5.41404e+06	2.57853e+06	3.48524e+06	728394	3.71048e+06	3.95537e+06	3.82807e+06	2.94257e+06	6.79849e+06	6.60144e+06
4.30_283.0822m/z	283.082	4.29768	neg	p-Cresol glucuronide	HMDB0011686	Organic oxygen compounds	Organooxygen compounds	Carbohydrates and carbohydrate conjugates	M-H	C13H16O7	56.1	83.1	-0.329914	2.74837	0.0292827	0.290412	0.902318	1.86907	189438	101354	112496	51468.8	246438	176110	241341	91836.9	222945	153871	232721	365152	176824	15873.5	94699.1	88056.5	92729.8	259655	22472.5	59677.5	136919	66636
6.23_335.0596m/z	335.06	6.22745	neg	{4-[(1E)-3-(4-hydroxy-2-methoxyphenyl)prop-1-en-1-yl]phenyl}oxidanesulfonic acid	HMDB0130353	Unclassified	Unclassified	Unclassified	M-H	C16H16O6S	56.1	85.9	0.349262	3.49711	0.00454002	0.103528	-0.842066	0.557844	146242	262156	121358	199476	150414	171912	158741	136581	145188	164743	93199.9	120808	134169	255250	226356	189967	245280	289086	263230	432082	131421	454715
6.12_365.0332m/z	365.033	6.1215	neg	L-Homocysteic acid	HMDB0002205	Organic acids and derivatives	Carboxylic acids and derivatives	Amino acids, peptides, and analogues	2M-H	C4H9NO5S	54	79.6	0.523476	1.09499	0.0471227	0.363339	-1.33295	0.396956	5765.91	14525.3	2890.85	13422.2	7439.55	4840.3	3120.99	3748.23	3586.84	11510.8	4367.96	2731.37	47284.7	20367.2	12266.3	7846.3	13403.1	7475.3	4891.16	9099.94	6890.03	15729
11.68_310.3101m/z	310.31	11.6849	pos	3,7,11,15-Tetramethyl-6,10,14-hexadecatrien-1-ol	LMFA05000210	Lipids and lipid-like molecules	Fatty Acyls	Fatty alcohols	M+NH4	C20H36O	53.8	74.4	-1.08771	1.70773	0.0382427	0.334318	-0.179813	0.882818	293091	331995	308970	334934	335060	276576	289985	282771	297495	309501	259985	235632	318160	439597	343785	278440	343065	303213	365499	312991	307407	307794
0.71_257.1027n	280.092	0.70895	pos	Glycerophosphocholine	HMDB0000086	Lipids and lipid-like molecules	Glycerophospholipids	Glycerophosphocholines	M+Na, M+K, 2M+Na	C8H20NO6P	53.7	71.3	-0.654542	6.028	0.024348	0.267022	0.614383	1.5309	1.52604e+06	996820	1.79967e+06	2.18741e+06	1.72468e+06	2.39832e+06	1.22526e+06	1.11075e+06	394438	1.63999e+06	1.51833e+06	1.26151e+06	1.05237e+06	877781	881111	883423	912953	1.00121e+06	1.2005e+06	371873	926428	1.86055e+06
9.44_436.2834m/z	436.283	9.44357	neg	PE(P-16:0e/0:0)	HMDB0011152	Lipids and lipid-like molecules	Glycerophospholipids	Glycerophosphoethanolamines	M-H	C21H44NO6P	53.1	76.7	0.0156661	1.11832	0.0432218	0.349218	0.590898	1.50618	55435.5	36805.2	55773.7	87028.7	102938	39442.6	46921	32998.9	63475.4	33643.5	39899.7	52233.1	35187	43544.6	38909.1	34218.7	34718.6	42669.7	28890.2	10323.7	33552.1	66038.6
3.46_784.1499m/z	784.15	3.45708	neg	Flavin adenine dinucleotide (FAD)	2302	Unclassified	Unclassified	Unclassified	M-H	C27H33N9O15P2	52.3	70.1	0.00486737	1.78548	0.00329526	0.0856473	0.356845	1.28062	111509	87074.1	121630	106565	128510	82318.2	87520.7	94775.1	135881	131267	108928	117697	72244.5	69790	90209	73499.3	82713.4	88157.9	111391	88852.5	94366.2	99517
10.10_352.2610n	370.295	10.1025	pos	MG(18:3(6Z,9Z,12Z)/0:0/0:0)	HMDB0011569	Lipids and lipid-like molecules	Fatty Acyls	Lineolic acids and derivatives	M+H, M+NH4, M+K	C21H36O4	51.8	64.8	-0.885673	3.27589	0.0275702	0.281112	-0.168195	0.889955	783696	880602	818838	898785	898552	781604	744439	697161	831156	724413	821375	620642	988006	1.00106e+06	932440	906827	924748	739211	905201	859435	745800	803295
7.06_230.2477m/z	230.248	7.06188	pos	Xestoaminol C	53933	Unclassified	Unclassified	Unclassified	M+H	C14H31NO	51.3	59	-0.399327	1.73609	0.00397988	0.0953022	-0.174162	0.886282	360617	406888	337565	378077	394726	386593	349057	366939	355877	358448	346700	332193	336826	482202	389761	396347	403352	427480	440529	377223	421375	393783
3.30_230.9965m/z	230.997	3.29988	neg	2-[3-(sulfooxy)phenyl]acetic acid	HMDB0125163	Organic acids and derivatives	Organic sulfuric acids and derivatives	Arylsulfates	M-H	C8H8O6S	50.4	58.2	-1.58846	1.29591	0.0482882	0.366739	-0.467303	0.723315	51681.3	71450.6	47213.2	31718.2	81731.9	57137.7	50381	80700.3	32374.1	46012.8	37050.1	52494	77711.2	57838.4	65972.6	50170.9	67331.2	79614.1	47340.3	126313	53233.4	88980.6
0.81_203.1157n	204.123	0.811783	pos	DL-Acetylcarnitine	LMFA07070060	Lipids and lipid-like molecules	Fatty Acyls	Fatty esters	M+H, M+Na, 2M+H	C9H17NO4	50.3	53	-0.079574	5.7422	0.0443198	0.352589	0.235786	1.17755	3.07471e+06	2.61112e+06	2.56741e+06	2.8271e+06	3.84933e+06	2.57079e+06	2.90728e+06	2.50398e+06	3.65355e+06	2.91463e+06	2.71908e+06	4.23399e+06	2.78695e+06	2.33692e+06	2.66728e+06	2.11988e+06	2.59602e+06	2.28601e+06	2.75121e+06	3.10833e+06	2.60894e+06	2.84961e+06
0.63_308.1583n	309.165	0.6342	pos	1-[(5-Amino-5-carboxypentyl)amino]-1-deoxyfructose	HMDB0034879	Organic oxygen compounds	Organooxygen compounds	Carbohydrates and carbohydrate conjugates	M+H-H2O, M+H	C12H24N2O7	50.1	54.6	-0.0430552	1.73794	0.000286784	0.0203884	-0.47215	0.72089	63653.8	88299	65521.5	64402.7	39286.9	85490.8	52272.4	71713.2	52120.6	57999.6	58783.3	88947.2	88489	91840.5	84035.6	88820.6	85821.9	101473	95144.6	74550.9	77266	95547.2
10.55_811.6061n	834.599	10.5522	pos	PC(20:0/18:3(6Z,9Z,12Z))	HMDB0008271	Lipids and lipid-like molecules	Glycerophospholipids	Glycerophosphocholines	M+H-H2O, M+Na	C46H86NO8P	48.5	57.5	-3.69479	28.6204	0.0105187	0.163508	-0.515537	0.699533	1.4883e+07	2.12757e+07	1.607e+07	2.01763e+07	5.47605e+06	1.70126e+07	1.53613e+07	1.62203e+07	1.63944e+07	1.74104e+07	1.61137e+07	8.59518e+06	3.21779e+07	2.80659e+07	2.0355e+07	2.45309e+07	2.17732e+07	1.82178e+07	2.01338e+07	1.65976e+07	1.55584e+07	1.53463e+07
4.27_187.0064m/z	187.006	4.26582	neg	p-Tolyl Sulfate	263577	Unclassified	Unclassified	Unclassified	M-H	C7H8O4S	47.6	48	-3.39441	3.09466	0.0271787	0.279754	1.06542	2.09278	250245	119575	148362	97572.2	257672	227636	318642	104224	257852	185600	285482	619404	257072	12404.8	120225	53407.3	109264	264809	44557	112642	142255	79112.2
11.17_325.1843m/z	325.184	11.1653	neg	2-Dodecylbenzenesulfonic acid	HMDB0031031	Benzenoids	Benzene and substituted derivatives	Benzenesulfonic acids and derivatives	M-H	C18H30O3S	46.5	41	0.121391	5.46197	0.0110007	0.167763	-0.364821	0.776565	996738	1.28352e+06	1.04944e+06	1.15229e+06	1.00731e+06	907872	1.06437e+06	1.01345e+06	983349	877199	990617	921485	1.1193e+06	1.26152e+06	1.2891e+06	1.01917e+06	1.29771e+06	997102	1.76307e+06	1.87522e+06	966539	1.24647e+06
9.68_311.1687m/z	311.169	9.6792	neg	N-Undecylbenzenesulfonic acid	HMDB0032549	Benzenoids	Benzene and substituted derivatives	Benzenesulfonic acids and derivatives	M-H	C17H28O3S	46.4	39.5	0.19225	5.2754	0.0125815	0.17939	-0.348617	0.785337	1.00093e+06	1.27452e+06	1.04833e+06	1.00094e+06	1.05064e+06	970992	1.11106e+06	1.01215e+06	1.02848e+06	867651	995842	923231	1.1522e+06	1.12255e+06	1.30347e+06	1.04564e+06	1.29989e+06	1.03474e+06	1.5828e+06	1.98781e+06	994139	1.22201e+06
7.62_502.3297n	501.322	7.61805	neg	Medicagenic acid	HMDB0034551	Lipids and lipid-like molecules	Prenol lipids	Triterpenoids	M-H, M+FA-H	C30H46O6	45.3	34.3	0.45952	1.46364	0.0439126	0.351234	-1.30455	0.404846	16925.1	41806.4	8879.98	28967.9	4129.9	17728.1	21929.6	14083	17866	35492.6	10284.9	9889.48	44174.4	77146.3	36690.2	123300	38512.7	11854.5	19612.1	3463.75	34971	28338.5
0.71_161.1051n	184.094	0.70895	pos	Malonyl-Carnitin	HMDB0062496	Organic nitrogen compounds	Organonitrogen compounds	Quaternary ammonium salts	M+Na, M+K	C7H15NO3	44	24.4	-0.43739	1.37916	0.00710429	0.13151	1.24727	2.37392	40854.4	17209.6	52366.8	31055.1	20711.2	43052.3	62343.8	10870	4578.17	66170.8	44584.6	72811	21448.8	19015.3	14742.8	25277.8	15713.3	10158	15065.2	2423.72	25397.8	22853.7
0.75_117.0789n	257.147	0.752683	pos	Betaine	HMDB0000043	Organic acids and derivatives	Carboxylic acids and derivatives	Amino acids, peptides, and analogues	M+Na, 2M+Na, 2M+H	C5H11NO2	43.8	20.8	-0.434379	3.00051	0.035418	0.320557	0.603843	1.51976	377516	248405	327491	284653	222115	558487	457182	292235	170345	473114	497832	491710	420506	111592	213594	208300	229981	471991	131696	218877	318310	159206
14.19_128.1183m/z	128.118	14.1933	pos	Galegine	66896	Unclassified	Unclassified	Unclassified	M+H	C6H13N3	43.4	20.7	0.632402	1.35998	0.0263598	0.275414	-0.126939	0.915772	192663	210383	213930	205349	194991	197547	190410	183599	208369	178708	181975	171751	239500	230294	218270	215740	217689	201180	189070	211852	203437	176800
13.79_366.3729m/z	366.373	13.7872	pos	Behenoyl-EA	LMFA08040052	Lipids and lipid-like molecules	Fatty Acyls	Fatty amides	M+H-H2O	C24H49NO2	42.7	19.3	-0.432826	1.37153	0.0310739	0.300643	-0.230132	0.852557	113963	133672	167447	109536	121443	110500	104754	105382	123029	103602	98621.4	95318.4	168594	147140	138196	121551	137734	136028	138144	116082	118954	114303
6.34_469.1105m/z	469.111	6.34127	pos	3,6,7-Trihydroxy-4'-methoxyflavone 7-rhamnoside	HMDB0041455	Phenylpropanoids and polyketides	Flavonoids	Flavonoid glycosides	M+Na	C22H22O10	41.9	12.1	0.0497178	1.30811	1.52602e-05	0.00553297	-0.300931	0.811729	57870.6	71293.1	63569.8	56770.7	53455.5	58156	59668.3	59178.2	61258.5	59587	60566.5	46495.8	71504.1	77596.6	66591	82758.5	70308.6	70095.6	70735.1	69763.9	70331.7	63245.8
7.01_273.2667n	274.274	7.01063	pos	C16 Sphinganine	LMSP01040001	Lipids and lipid-like molecules	Sphingolipids	Sphingoid bases	M+H-H2O, M+H	C16H35NO2	41.7	11.3	-0.117481	6.35253	0.0441234	0.351778	0.212909	1.15902	3.63052e+06	3.13239e+06	3.26975e+06	3.09472e+06	3.5496e+06	5.21945e+06	3.65775e+06	4.354e+06	3.63413e+06	3.16339e+06	3.37557e+06	2.98678e+06	3.48585e+06	3.3569e+06	3.18688e+06	3.24363e+06	3.10966e+06	2.89378e+06	3.1176e+06	2.54811e+06	3.20083e+06	3.1807e+06
15.76_166.0482n	149.045	15.7591	pos	L-Lyxonate	HMDB0060255	Organic oxygen compounds	Organooxygen compounds	Carbohydrates and carbohydrate conjugates	M+H-H2O, M+H	C5H10O6	41.4	18.7	2.68624	2.56471	0.000277029	0.0203884	-0.778259	0.58307	74767.6	128231	136115	43353.1	55422.2	65690.2	56701.5	48911.3	48807.4	119914	48591.5	124171	137081	124050	135344	135019	134672	122764	120634	135068	126563	111114
15.97_271.2631m/z	271.263	15.9704	pos	2,6-Dimethyl-5-heptenyl octanoate	97290	Lipids and lipid-like molecules	Fatty Acyls	Fatty esters	M+H	C17H34O2	41	7.95	-0.367308	2.62418	0.000293532	0.0204689	-0.763975	0.588871	81330.4	138112	141816	52880	54198.2	69633.6	61939.1	52386.7	48864.1	136915	59779.7	134891	141333	140031	143352	141263	143542	126486	127362	142723	145041	129989
0.71_156.0420m/z	156.042	0.70895	pos	5-amino-pentanoic acid	LMFA01100040	Lipids and lipid-like molecules	Fatty Acyls	Fatty Acids and Conjugates	M+K	C5H11NO2	40.9	11	-0.76945	2.12384	0.00232933	0.0679724	1.48319	2.79565	77449.1	27703.4	74798.1	82603.9	46135	98676.7	73852.3	28429.4	15311.6	88031.1	101969	164683	55630.3	15768.9	23422.1	24009.6	25228.2	30975.1	14231.2	15102.7	47009.2	25656.7
9.24_524.2993m/z	524.299	9.24122	pos	Isoamoritin	LMPK12140384	Lipids and lipid-like molecules	Polyketides	Flavonoids	M+NH4	C31H38O6	40.7	13.7	-2.5975	3.17088	0.000221712	0.0181308	0.190324	1.14102	653037	572328	653563	634533	609891	679569	647774	661240	662249	693925	653885	633745	622897	630430	545223	618841	556561	561254	601135	467093	583856	535987
0.74_177.1346m/z	177.135	0.737967	pos	Dimethylurea	HMDB0029198	Organic acids and derivatives	Organic carbonic acids and derivatives	Ureas	2M+H	C3H8N2O	40.3	4.48	-0.0326632	4.34576	0.0100061	0.157908	-1.68033	0.312011	100346	321610	3.74188e-07	1001.39	3.74188e-07	4397.39	259750	391681	342129	602.246	1635.16	2263.58	140802	359478	316518	431760	335097	269854	286580	755659	203442	116913
3.42_423.0813m/z	423.081	3.4227	neg	N-phosphocreatinate(2-)	HMDB0062567	Unclassified	Unclassified	Unclassified	2M-H	C4H11N3O5P+	40.3	13.5	3.2111	1.14535	0.0452565	0.356012	-0.428694	0.742934	41899.7	56397.6	44256.4	38357.3	39595.3	44427.8	34759.5	50010.5	30062.3	41428.8	35610	60488.6	44237.7	50072.1	54900.1	39330	55170.8	44870	77083.6	75806.8	30052.8	92451.9
14.03_113.0482n	225.089	14.027	neg	1-Pyrroline-2-carboxylic acid	HMDB0006875	Organoheterocyclic compounds	Pyrrolines	Unclassified	M+FA-H, 2M-H	C5H7NO2	39.9	13.4	4.3758	1.6061	0.0191601	0.232146	0.100807	1.07237	454515	423840	463756	417621	465688	472230	452880	470081	497150	409470	466192	430078	436455	425801	452686	405584	447618	377793	399751	460512	419508	412692
3.09_190.0743n	191.081	3.09312	pos	6-Hydroxy-1H-indole-3-acetamide	87466	Organoheterocyclic compounds	Indoles and derivatives	Hydroxyindoles	M+H-H2O, M+H	C10H10N2O2	39.9	11	0.57884	2.07139	0.0417951	0.34246	2.17897	4.52829	70570.6	15584.4	12684.7	126313	129782	1159.08	24977.3	8094.7	233124	2646.58	42795.9	124129	19919.1	12539.2	39903.9	881.852	15378.9	14755	4240.56	16895.4	4678.56	26651.4
0.07_158.1306n	159.138	0.0741833	pos	Pelargonic acid	HMDB0000847	Lipids and lipid-like molecules	Fatty Acyls	Fatty acids and conjugates	M+H-H2O, M+H	C9H18O2	39.5	0	-0.422504	1.31041	0.00023486	0.0185673	0.52635	1.44028	37804.1	26247.7	33389.7	34903.9	31191.7	33129.2	35390	38081.7	47460.5	38375.2	44865.8	41253.5	15331.1	19929.5	26930.5	23647.9	27293.4	24283.7	27191	36271.8	32455.2	29143.3
0.72_244.0791m/z	244.079	0.723467	pos	N-Acetylgalactosamine	HMDB0000212	Organic oxygen compounds	Organooxygen compounds	Carbohydrates and carbohydrate conjugates	M+Na	C8H15NO6	39.3	0	-0.395539	2.00657	0.0129655	0.182581	-0.324935	0.798334	123627	154857	118231	115309	108700	167784	144749	126861	69584.9	137167	109223	138665	196392	155343	144183	165406	149646	171860	167853	124569	111522	161792
0.77_342.1393m/z	342.139	0.767317	pos	2-Hydroxy-2-ethylsuccinic acid	HMDB0059758	Lipids and lipid-like molecules	Fatty Acyls	Fatty acids and conjugates	2M+NH4	C6H10O5	39.3	0	-0.480173	1.00981	0.00871717	0.146183	-0.511762	0.701365	16347.4	23307.9	13410.2	11283.4	14815.1	20023.1	22514.8	15181.5	10595.9	17541.1	13131.9	24976.4	33441.1	19807.7	23757.7	18812.7	24821.5	22248	24826	28061	12020.2	25283.3
0.00_128.1202n	257.247	0.00231667	pos	(R)-Sulcatol	HMDB0030030	Lipids and lipid-like molecules	Fatty Acyls	Fatty alcohols	M+H, M+Na, 2M+H	C8H16O	39.2	0	0.734756	1.10191	0.00173494	0.0570562	0.374797	1.29666	39690.7	30610	31161.1	36681.5	39260.1	36884.3	35566.2	38288.8	51269.3	36912.8	48493.7	42389.4	23323.5	27110.7	31960.7	29298.5	32037.4	26206.7	30430.9	41264.6	33838	30629.4
0.75_279.1913m/z	279.191	0.752683	pos	hydroxyisovaleroyl carnitine	HMDB0062555	Lipids and lipid-like molecules	Fatty Acyls	Fatty acid esters	M+NH4	C12H23NO5	39.2	0	-0.511775	1.83948	0.00104335	0.0416852	0.644312	1.56299	76113.1	48697	61345.6	83581.4	76082	74888.9	88659.4	46653.3	75494.4	92301.7	85266.1	76858.2	54785.1	29464.7	45157.2	38663.7	46140.6	83414.3	42784.9	35803.2	75022.3	35734
10.03_310.1617m/z	310.162	10.0274	pos	Histidinyl-Histidine	HMDB0028887	Organic acids and derivatives	Carboxylic acids and derivatives	Amino acids, peptides, and analogues	M+NH4	C12H16N6O3	39.2	0	-1.83808	2.46932	1.3084e-05	0.00512857	0.48799	1.40249	138719	98908.8	130637	127146	138550	130919	122708	137348	138880	166919	169269	124809	84818.7	104196	93691.2	105317	95489.9	87007	109830	78366.4	108110	122262
9.61_468.3083m/z	468.308	9.61345	pos	PA(19:1(9Z)/0:0)	LMGP10050025	Lipids and lipid-like molecules	Glycerophospholipids	Glycerophosphates	M+NH4	C22H43O7P	39.1	0	-0.317059	1.16155	0.00644955	0.124884	0.305489	1.23584	70504.4	57049.9	75961.8	74058.9	58070.7	82848	71729.2	68743.8	72478.5	84550.6	56999.5	59603.2	64638.2	62070.6	52161.5	59658.5	53288.6	75029.7	60068.8	38028.3	53828.5	51726.4
10.69_297.2898m/z	297.29	10.6908	pos	Linoleamide	HMDB0062656	Lipids and lipid-like molecules	Fatty Acyls	Fatty amides	M+NH4	C18H33NO	39	0	-0.75868	2.34934	0.0125354	0.178938	-0.346722	0.786369	174023	221300	221755	173645	144206	139814	241720	153000	170057	179003	153881	163150	221005	257982	223818	181661	220623	224307	291170	184631	147049	260749
14.23_419.2765m/z	419.277	14.2284	pos	Buspirone N-oxide	HMDB0061107	Organoheterocyclic compounds	Diazinanes	Piperazines	M+NH4	C21H31N5O3	39	0	0.076163	3.21951	0.0349558	0.31884	-0.189221	0.877079	733816	836659	890449	908302	726875	726315	694849	680705	761989	692537	632441	623700	988813	1.02492e+06	852998	825945	852700	812498	752226	775896	809036	671562
3.66_407.1594m/z	407.159	3.66153	pos	LysoPA(a-13:0/0:0)	HMDB0114760	Lipids and lipid-like molecules	Glycerophospholipids	Glycerophosphates	M+K	C16H33O7P	39	0	-0.302831	1.09597	0.00142151	0.0501912	2.14445	4.42123	11704.2	2647.28	12326.4	11548.9	17263.4	19976.2	7878.22	3.74188e-07	14427.9	16521.9	11944.4	5154.77	592.387	241.592	2440.53	3.74188e-07	2453.97	15485.9	96.7674	3.74188e-07	1975.52	3186.12
9.63_481.2802n	980.593	9.62853	pos	PC(10:0/4:0)	LMGP01010403	Lipids and lipid-like molecules	Glycerophospholipids	Glycerophosphocholines	M+NH4, 2M+NH4	C22H44NO8P	39	0	-0.618829	2.74454	0.0445999	0.353654	-3.10412	0.116297	13827.9	118902	14547.3	11391.4	15828.6	14292.4	40860	6349.56	3.74188e-07	8982.25	10418	15609.5	26923.8	3186.79	101559	18314.8	108093	91467.6	403801	397579	7997.29	30096.5
12.64_339.1999m/z	339.2	12.6438	neg	NORETHINDRONE ACETATE	44171	Unclassified	Unclassified	Unclassified	M-H	C22H28O3	38.9	14.2	9.82603	4.57108	0.00061032	0.0311671	-0.320151	0.800986	602437	752119	747919	659774	604825	556848	625369	580482	620570	541663	546997	539926	827508	751511	757529	650409	757718	699372	816769	945389	640290	674699
9.58_565.3532m/z	565.353	9.58173	pos	Malonoben	HMDB0031799	Benzenoids	Benzene and substituted derivatives	Phenylpropanes	2M+H	C18H22N2O	38.9	0	-0.921253	1.99919	0.037531	0.331162	-2.52743	0.173447	11088.2	63928.5	9786.95	9529.99	11936.3	10872.5	26469	9520.88	6742.32	8808.28	7603.61	9612.29	18691.6	11507.8	55938.3	15726.8	59182.2	50188.2	176010	221356	8513.85	22170.6
14.29_627.5347m/z	627.535	14.2901	pos	DG(18:0/20:4(5Z,8Z,11Z,14Z)/0:0)	HMDB0007170	Lipids and lipid-like molecules	Glycerolipids	Diradylglycerols	M+H-H2O	C41H72O5	38.8	0	-0.0033268	4.38098	0.00933617	0.151418	0.922583	1.89551	371012	195733	303809	424113	396273	433227	510159	412473	238691	216630	393369	381381	2962.89	3.74188e-07	162451	3.74188e-07	178696	318774	179708	235462	454822	424450
9.19_453.2856n	907.577	9.19202	pos	LysoPE(0:0/16:0)	HMDB0011473	Lipids and lipid-like molecules	Glycerophospholipids	Glycerophosphoethanolamines	M+Na, M+K, 2M+H, M+H-H2O	C21H44NO7P	38.8	0	0.15349	1.36374	0.0150476	0.200559	0.403458	1.32267	77689.9	58737	112062	82795.4	71444.9	93419.6	78542.3	51650.8	64898	89976.5	74985.4	57123.6	61329.4	58085.5	52489.8	62182	54384.9	76963.2	76536.4	32067.3	64177.2	49154.2
0.74_292.1977m/z	292.198	0.737967	pos	Glutaminyllysine	HMDB0028802	Organic acids and derivatives	Carboxylic acids and derivatives	Amino acids, peptides, and analogues	M+NH4	C11H22N4O4	38.6	0	-0.890202	1.80155	0.00346695	0.0882126	1.57386	2.97699	54219.3	18212.8	57717	84089.7	53521.6	48390.4	30130.4	11953.4	14896.7	43904.9	101694	95895.2	37887.6	5218.25	15392.1	11768.7	16557.1	27351	5767.69	3668.7	35102.8	23413.7
0.75_342.1160n	325.113	0.752683	pos	D-Maltose	HMDB0000163	Organic oxygen compounds	Organooxygen compounds	Carbohydrates and carbohydrate conjugates	M+H-H2O, M+H, M+Na, M+NH4	C12H22O11	38.6	0	-0.518174	2.30507	0.0157478	0.205584	-0.495739	0.709198	94417.4	133133	72052.8	70467.8	81267.9	132743	111414	88448.9	71178.4	91872.4	79346.3	145382	198005	100687	137912	113135	140043	121991	121124	190113	75496.2	132821
10.31_353.3290n	336.326	10.3052	pos	Anandamide (20:l, n-9)	LMFA08040010	Lipids and lipid-like molecules	Fatty Acyls	Fatty amides	M+H-H2O, M+Na	C22H43NO2	38.6	0	-1.13813	2.08057	0.0375392	0.331162	-0.266464	0.831354	224334	269841	227889	280718	292992	205740	225663	210528	228541	202876	211716	156673	274030	368665	283531	245676	281695	219007	314634	213441	204364	293366
10.46_472.3632m/z	472.363	10.4589	pos	27-Norcholestanehexol	LMST04020029	Lipids and lipid-like molecules	Sterol Lipids	Bile acids and derivatives	M+NH4	C26H46O6	38.6	0	-0.231144	1.44611	0.0252571	0.269733	-0.102984	0.931105	288885	310261	288358	276897	295614	296813	297793	278981	318997	273481	298311	263607	328437	322322	326875	328022	326131	276854	294634	330842	292866	275623
14.42_211.0038m/z	211.004	14.4211	pos	Benzyl sulfate	HMDB0034782	Benzenoids	Benzene and substituted derivatives	Unclassified	M+Na	C7H8O4S	38.6	0	1.16611	2.26861	0.00100412	0.0404519	-0.208738	0.865294	243921	281894	257657	233631	242576	258765	252906	237168	256676	221740	251233	226857	330485	297929	295472	292321	294583	263138	255797	288445	268687	232081
9.14_506.3603m/z	506.36	9.14012	pos	LysoPC(P-18:1(9Z))	HMDB0010408	Lipids and lipid-like molecules	Glycerophospholipids	Glycerophosphocholines	M+H	C26H52NO6P	38.6	0	-0.443829	1.0475	0.0188626	0.229501	0.359911	1.28335	47014	36633.9	43929.4	50980.7	56190.7	41678.1	44173.6	48329.9	42282.8	60057	37160.8	45356.6	25284.3	27560.5	33669.6	34854.5	34328.4	48091	49566	21312.5	39302.5	52369.1
9.53_653.4054m/z	653.405	9.53288	pos	Ajmaline	HMDB0015495	Alkaloids and derivatives	Ajmaline-sarpagine alkaloids	Unclassified	2M+H	C20H26N2O2	38.6	0	-1.08919	1.10153	0.0388873	0.335084	-2.27446	0.206691	4041.88	19555.2	3063.81	3258.72	4365.57	4015.41	9352.45	3508.86	1232.25	3326.65	2875.57	5419.45	6879.65	6154.35	17363.8	7672.35	17777.4	15356.7	45472.3	70991.2	1668.93	6215.25
0.74_217.0293m/z	217.029	0.741167	neg	Aspartyl-Cysteine	HMDB0028750	Organic acids and derivatives	Carboxylic acids and derivatives	Amino acids, peptides, and analogues	M-H2O-H	C7H12N2O5S	38.5	2.55	2.10287	6.79015	0.022062	0.25214	-0.141923	0.90631	3.49893e+06	3.86063e+06	3.35443e+06	3.2824e+06	3.13321e+06	3.73583e+06	3.9429e+06	3.36501e+06	3.15255e+06	3.38375e+06	3.27571e+06	4.36351e+06	4.1105e+06	3.74291e+06	3.85051e+06	3.69993e+06	3.89856e+06	3.82935e+06	3.90389e+06	4.01133e+06	3.37327e+06	4.18607e+06
0.00_369.3514m/z	369.351	0.00231667	pos	Cholesterol	LMST01010001	Lipids and lipid-like molecules	Sterol Lipids	Sterols	M+H-H2O	C27H46O	38.4	0	-0.364866	1.38976	0.000201543	0.0176083	1.20124	2.29937	24203.3	10526	18344.2	6225.17	20142.8	22925.9	25481	26730.8	32784.1	28572.5	26147.3	34679.3	8496.14	725.57	10642.7	12142.3	10805.4	13099.1	5690	15583.8	15964.1	12111.4
10.60_424.2821n	442.316	10.5991	pos	1b-Hydroxycholic acid	HMDB0000307	Lipids and lipid-like molecules	Steroids and steroid derivatives	Bile acids, alcohols and derivatives	M+NH4, M+Na	C24H40O6	38.4	0	-0.945412	1.02127	0.041726	0.342281	-0.180684	0.882284	70435.1	79832.7	67849.4	91213	78201.2	69936.3	64626.5	59442.1	73182	70588.7	69631.7	59680.3	89527.8	94879.8	85030.1	82476.6	84022.1	63102.5	81404.6	69318.8	69307.2	79257.2
15.04_313.3100m/z	313.31	15.0356	pos	Arachidic acid	HMDB0002212	Lipids and lipid-like molecules	Fatty Acyls	Fatty acids and conjugates	M+H	C20H40O2	38.4	0	-0.413678	1.23895	8.34908e-05	0.0125709	-0.69703	0.616841	18731.6	30367.1	30653.1	15085.4	13654.2	15545.9	16123.5	11625.9	11536.9	27313.2	18212	27566.5	31048.7	29765.6	31424.9	31059.1	31515.6	28171.6	28566.7	33180.2	30925.7	28012.5
10.66_207.0174m/z	207.017	10.6609	pos	2-Pyrroloylglycine	HMDB0059778	Organic acids and derivatives	Carboxylic acids and derivatives	Amino acids, peptides, and analogues	M+K	C7H8N2O3	38.3	0	4.27467	3.02349	0.00021167	0.0178069	0.202845	1.15097	529991	460475	487478	478618	530243	528965	539672	521893	579233	507122	614606	512076	467090	452665	481956	458271	482333	432746	433852	495353	476406	424075
10.78_332.2924n	350.326	10.7785	pos	1-O-(2R-hydroxy-hexadecyl)-sn-glycerol	LMGL01020063	Lipids and lipid-like molecules	Glycerolipids	Monoradylglycerols	M+NH4, M+Na	C19H40O4	38.3	0	-0.779162	1.71818	0.0487553	0.368006	-0.143612	0.90525	264590	292284	257895	318680	282841	254238	264384	257064	280357	232204	274944	223294	309478	342268	304191	283021	303769	246724	314476	305285	241579	272049
5.53_885.5480m/z	885.548	5.53187	pos	2,9-Bis(3-methyl-2E-pentenoyl)-2b,9a-dihydroxy-4Z,10(14)-oplopadien-3-one	HMDB0034065	Lipids and lipid-like molecules	Prenol lipids	Sesquiterpenoids	2M+H	C27H38O5	38.3	0	-3.54643	1.05381	0.0153745	0.20326	0.979102	1.97124	21186	10747.6	25293.2	16246.4	26902.7	39373.3	24731.5	11315.2	15206.1	16462.8	16464.1	19864.6	516.048	697.064	11261.4	903.851	12348.6	5149.86	10314.5	26013.4	23671.5	16599.3
14.29_887.5639m/z	887.564	14.2901	pos	PI(16:0/22:4(7Z,10Z,13Z,16Z))	HMDB0009794	Lipids and lipid-like molecules	Glycerophospholipids	Glycerophosphoinositols	M+H	C47H83O13P	38.2	0	-0.622559	4.83605	0.004395	0.10166	1.03749	2.05265	389026	189524	332715	395801	427234	469029	541362	404554	255727	247585	398071	418186	949.123	1868.5	156911	3.74188e-07	172602	279059	172675	188372	479356	443448
15.74_228.9754m/z	228.975	15.7415	pos	Oxalosuccinic acid	HMDB0003974	Organic acids and derivatives	Carboxylic acids and derivatives	Tricarboxylic acids and derivatives	M+K	C6H6O7	38.2	0	4.78131	1.32559	0.000409171	0.0248293	-0.913874	0.530758	12991.6	24477.4	15746.8	15134.5	12279.2	8203.48	11646.9	10324.4	9019.38	15522.2	16653.5	15385.5	40018.6	32980.8	26225.5	28696	25513.7	19746.1	18961.6	19983.8	18271.1	14377
9.24_296.1461m/z	296.146	9.24122	pos	Dothiepin	2429	Unclassified	Unclassified	Unclassified	M+H	C19H21NS	38.2	0.158	-2.07194	2.97529	1.30137e-08	0.000188738	0.454521	1.37033	196037	143059	172320	192874	202107	224887	176816	191646	202033	208197	199887	189607	137133	158946	137267	131028	140408	148386	148234	137832	143051	148304
9.45_438.2975m/z	438.297	9.45177	pos	Palmitoylcarnitine	LMFA07070004	Lipids and lipid-like molecules	Fatty Acyls	Fatty esters	M+K	C23H45NO4	38.2	0	-1.35644	1.65666	0.0292955	0.290412	0.522567	1.43651	122160	85039.7	129770	189554	207876	82654.2	94084.1	88209.1	128649	95323.7	94784.8	110698	74572.5	84030.4	85959.3	75490.5	79959.6	85663.8	82763.3	51278.4	85192.9	145487
9.57_587.3662m/z	587.366	9.56527	pos	Lysyl-Lysine	HMDB0028956	Organic acids and derivatives	Carboxylic acids and derivatives	Amino acids, peptides, and analogues	2M+K	C12H26N4O3	38.1	0	3.72965	1.78182	0.0413314	0.342257	-2.29562	0.203681	10701.8	52541.8	10330.1	7951.77	8761.23	13591.3	30344	8619.35	881.123	10264.6	7233.85	9040.24	14989	10672	45655.6	13368.1	48192.7	42827.9	139307	181737	6796.75	21872.2
0.78_155.1066m/z	155.107	0.78185	pos	Methyl 2-octynoate	HMDB0031302	Lipids and lipid-like molecules	Fatty Acyls	Fatty acid esters	M+H	C9H14O2	38	0	-0.330243	1.0649	0.00131893	0.0470909	0.340006	1.26576	39231.8	30994.6	34191.2	37094.5	34833.2	37912.5	38764.5	37534	47613	36811.4	48058.3	39505.1	21913.7	26563.6	32237	30138.6	32605.6	28377	30255.4	39716.5	35782.8	32355.7
10.71_813.6822m/z	813.682	10.7054	pos	SM(d18:1/24:1(15Z))	HMDB0012107	Lipids and lipid-like molecules	Sphingolipids	Phosphosphingolipids	M+H	C47H93N2O6P	38	0	-2.662	17.2193	0.0112238	0.169385	0.902073	1.86875	5.09703e+06	2.72751e+06	3.9146e+06	4.70631e+06	6.71752e+06	6.17564e+06	5.07679e+06	6.30099e+06	6.7946e+06	2.35635e+06	4.52916e+06	4.39833e+06	3.74188e-07	3.74188e-07	2.25707e+06	11306.1	2.48278e+06	3.03254e+06	6.03145e+06	3.19565e+06	5.09209e+06	5.17222e+06
15.97_223.0636m/z	223.064	15.9704	pos	Harmalan	HMDB0029834	Alkaloids and derivatives	Harmala alkaloids	Unclassified	M+K	C12H12N2	38	0	2.35331	1.45705	0.000155418	0.0154385	-0.780181	0.582294	22987.9	39478.3	41235.6	15644.1	16562.6	20016.5	17998.3	14329.4	14136.4	36000.2	16725.4	37231	42373.4	39077.2	41264.4	40673.5	41184.8	37060.5	37071.9	41901.8	38967.8	35207.3
2.01_369.3515m/z	369.352	2.00748	pos	5a-Cholest-8-en-3b-ol	HMDB0006841	Lipids and lipid-like molecules	Steroids and steroid derivatives	Cholestane steroids	M+H-H2O	C27H46O	38	0	-0.140118	1.19865	0.000339459	0.0219785	0.918717	1.89043	21641.1	11447.7	19032.5	7636.9	19116.7	21490.1	22308.3	22251.3	27622.2	24300.3	24203.9	28448.4	9413.42	1733.39	11856.1	12684	12040.4	13106.2	7663.41	16216.5	17275	12488.3
9.57_609.3791m/z	609.379	9.56527	pos	Pentazocine	HMDB0014790	Alkaloids and derivatives	6,7-benzomorphans	2,6-dimethyl-3-benzazocines	2M+K	C19H27NO	38	0	-4.56607	1.56282	0.0479731	0.366054	-2.18044	0.220608	9228.97	41834.2	7670.73	8444.8	8980.46	9785.53	20520	8581.69	6464.07	7202.83	7410.71	7228.87	18016.3	8140.06	37066.7	9287.48	38271.7	28234.3	112524	146963	6087.99	13750
14.28_205.0171m/z	205.017	14.2755	pos	O-methoxycatechol-O-sulphate	HMDB0060013	Organic acids and derivatives	Organic sulfuric acids and derivatives	Arylsulfates	M+H	C7H8O5S	37.8	0.169	2.85082	3.45656	0.00288888	0.0779327	-0.232349	0.851248	504917	593150	561018	526843	505436	509338	510397	486325	552271	453997	495337	448209	728723	644160	621109	623339	619339	533339	517742	606971	556318	480458
10.03_640.2927m/z	640.293	10.0333	neg	S-(9-deoxy-delta9,12-PGD2)-glutathione	HMDB0013058	Organic acids and derivatives	Carboxylic acids and derivatives	Amino acids, peptides, and analogues	M-H	C30H47N3O10S	37.7	0.0468	2.67256	2.0212	0.0221861	0.252761	-0.149869	0.901332	360738	400227	382989	377938	379031	316893	353170	358448	365941	380815	385242	306908	434216	462480	398295	424262	394665	370114	425079	324403	353150	415606
3.98_659.2119m/z	659.212	3.97502	neg	Melilotocarpan C	LMPK12070086	Lipids and lipid-like molecules	Polyketides	Flavonoids	2M-H	C18H18O6	37.6	0	-2.21079	2.71335	0.0387336	0.334899	-0.766019	0.588038	108124	183873	125984	200509	3.74188e-07	16680.7	86470.7	50643.4	77624.1	199439	178452	145441	287345	149364	170771	99129.7	183046	56315.4	177855	229045	317103	168757
9.23_949.6245m/z	949.625	9.22518	pos	di-trans,poly-cis-undecaprenyl diphosphate	LMPR03030008	Lipids and lipid-like molecules	Prenol lipids	Polyprenols	M+Na	C55H92O7P2	36.8	1.25	3.75653	2.88516	0.024759	0.267044	0.30951	1.23929	468176	377779	602113	482592	370733	555570	433232	380027	422358	609146	407355	418633	399237	423992	333758	418544	349766	484367	446817	218808	364858	337638
15.94_241.8838m/z	241.884	15.9352	pos	2-chloro-2-iodoacetamide	LMFA01090147	Lipids and lipid-like molecules	Fatty Acyls	Fatty Acids and Conjugates	M+Na	C2H3ClINO	36.2	0	-0.982353	1.57883	4.34156e-05	0.00874522	-1.43143	0.370764	9071.93	24468.2	14052.5	11407.1	4383.44	4426.1	8379.17	4062.49	5664.39	12106.3	13349.2	12888.6	41608.7	33827.4	25427.3	26565.6	25136.1	20261.9	19394.1	20380.9	16975.1	15105
0.84_301.0177m/z	301.018	0.843233	neg	{2-hydroxy-5-[(2E)-3-phenylprop-2-enoyl]phenyl}oxidanesulfonic acid	HMDB0135412	Phenylpropanoids and polyketides	Linear 1,3-diarylpropanoids	Chalcones and dihydrochalcones	M-H2O-H	C15H12O6S	36	0	0.188674	1.05864	0.0318034	0.305258	-1.0958	0.467877	14663.5	31340.5	7039.92	3148.88	1228.49	27667.9	13421.2	26429.7	2739.49	20327.6	9394.51	35237.3	26703.3	17027.1	26711.2	46795.9	29194.7	80244.4	27308.5	22452.8	20244.1	16722.6
3.44_786.1634m/z	786.163	3.44317	pos	FAD	HMDB0001248	Nucleosides, nucleotides, and analogues	Flavin nucleotides	Unclassified	M+H	C27H33N9O15P2	35.9	0	-1.30734	1.10653	0.00326219	0.0849399	0.859287	1.81414	24056.2	13260.4	39958.4	29810.4	15320	12703.9	17104	29231.6	29993.6	32892.1	15251.6	18296.1	11613.9	8161.59	13841.7	10683.4	12606.4	12658.3	12312.5	14186.1	22389.2	14150.4
6.50_603.5345m/z	603.535	6.50005	pos	DG(18:1(9Z)/18:1(9Z)/0:0)	HMDB0007218	Lipids and lipid-like molecules	Glycerolipids	Diradylglycerols	M+H-H2O	C39H72O5	35.9	0	-0.226466	1.44981	1.68693e-06	0.00244655	2.40761	5.30594	16345.3	3080.57	15081	14635.1	12533.8	16201.7	19948.8	16591.7	22053.2	19578.4	17894.1	8935.55	104.116	0.341139	2556.3	58.0113	2811.93	3.74188e-07	22.7326	5239.46	14878	5134.8
9.24_523.2988m/z	523.299	9.24122	pos	(Z,Z)-2,9,16-Heptadecatriene-4,6-diyn-8-ol	HMDB0032674	Lipids and lipid-like molecules	Fatty Acyls	Fatty alcohols	2M+K	C17H22O	35.9	0.0151	3.07467	3.915	3.92167e-07	0.000965442	0.466444	1.3817	352455	255088	358374	375039	354904	375567	336166	366052	348598	352717	339686	317441	225785	277521	238815	219707	246745	277602	310008	200673	255616	298404
8.11_603.5345m/z	603.534	8.11483	pos	DG(18:0/18:2(9Z,12Z)/0:0)	HMDB0007161	Lipids and lipid-like molecules	Fatty Acyls	Lineolic acids and derivatives	M+H-H2O	C39H72O5	35.8	0	-0.309993	1.07102	5.53456e-06	0.00359936	2.23576	4.7101	9516.93	2020.54	7952.56	11513.3	7470.75	9449.15	9761.04	10396.9	12752.2	11312.7	9491.83	5068.94	228.67	3.74188e-07	1680.93	106.606	1849.02	3.74188e-07	3.74188e-07	2387.62	9418.47	4534.07
14.28_909.5498m/z	909.55	14.2779	neg	PI(22:6(4Z,7Z,10Z,13Z,16Z,19Z)/18:0)	HMDB0009920	Lipids and lipid-like molecules	Glycerophospholipids	Glycerophosphoinositols	M-H	C49H83O13P	35.7	0	-0.0790034	2.14547	0.00879562	0.146226	0.956805	1.94101	92609.7	47712.2	95330.5	104220	82831.1	129809	116332	85075.3	26351.7	106716	121870	57561.1	17641.2	13818.3	44450.2	2471.07	48895.3	95196.3	7198.58	96290.9	85176.8	65983.5
5.53_833.5182m/z	833.518	5.52645	neg	PI(16:1(9Z)/18:1(11Z))	HMDB0009800	Lipids and lipid-like molecules	Glycerophospholipids	Glycerophosphoinositols	M-H	C43H79O13P	35.7	0	-0.407407	2.4411	0.0404311	0.33909	0.946993	1.92785	153995	79878.9	108158	219575	116448	158148	237887	174417	13904.8	97693	230355	183361	19723	622.327	67102.5	3.74188e-07	73812.8	153360	16133.4	74535.4	237452	156047
10.92_794.5669m/z	794.567	10.9161	pos	PE(22:2(13Z,16Z)/18:3(9Z,12Z,15Z))	HMDB0009557	Lipids and lipid-like molecules	Glycerophospholipids	Glycerophosphoethanolamines	M+H	C45H80NO8P	35.6	0	-3.24381	4.16926	0.0329549	0.310555	-0.362424	0.777857	560974	721179	605377	812567	343673	465947	570499	592724	602843	622767	662008	331330	912839	973768	716092	767192	737544	594809	870458	480807	544310	613968
1.10_671.1063m/z	671.106	1.09818	neg	(5-{8-[3,7-dihydroxy-2-(3-hydroxyphenyl)-3,4-dihydro-2H-1-benzopyran-4-yl]-3,5,7-trihydroxy-3,4-dihydro-2H-1-benzopyran-2-yl}-2-hydroxyphenyl)oxidanesulfonic acid	HMDB0135098	Phenylpropanoids and polyketides	Flavonoids	Biflavonoids and polyflavonoids	M+FA-H	C30H26O13S	35.3	0	-2.08541	1.40925	0.0102207	0.160771	-1.5841	0.333533	9128.52	27369.1	6778.07	3.74188e-07	4399.57	3.74188e-07	15619.8	34718.1	3.74188e-07	18524.1	10965.8	279.754	49386.4	15968.9	22958.7	6072.98	24881	26437.1	27208.4	61806.8	26189.9	12781.2
10.66_152.0467m/z	152.047	10.6609	pos	2-Acetylpyrrolidine	HMDB0037293	Organoheterocyclic compounds	Pyrrolidines	Unclassified	M+K	C6H11NO	35.3	0	-4.57487	1.77148	3.98512e-05	0.00849944	-0.422177	0.746298	61039.1	81789.2	62623.6	63284.6	68376	59986.2	61415.2	58840.8	64091.8	55628	64400.1	51744.4	100118	93478	87264.5	85446.1	86199.4	76047	70133.9	82983.4	73011.5	63209.8
6.64_886.5561n	909.545	6.64115	pos	PI(18:1(9Z)/20:3(8Z,11Z,14Z))	HMDB0009843	Lipids and lipid-like molecules	Glycerophospholipids	Glycerophosphoinositols	M+Na, M+K	C47H83O13P	35.1	0	-1.14025	2.10652	0.00146872	0.0509589	1.4302	2.69484	58560.7	21730.7	49198.3	40432.3	80440.6	70635.2	65940.6	73939.5	90837.7	34749.2	25459.1	53974.9	1537.49	623.256	18084	1332.05	19877.3	367.174	43758.1	34817.2	28448.9	68461.5
0.00_141.0101m/z	141.01	0.00231667	pos	Benzoyl chloride	72903	Unclassified	Unclassified	Unclassified	M+H	C7H5ClO	35	0.311	-0.441652	1.1188	0.00176085	0.0577774	0.217674	1.16286	64604.8	55556.9	57905.7	58724.1	61369.4	59484	66244	66083.3	75275	66056.6	70746.2	64159.2	47281.2	50086.5	57390.4	55697.6	57533.8	53615.6	52984.9	65609.5	62512.1	52857.5
13.08_699.5951m/z	699.595	13.0844	pos	TG(14:1(9Z)/14:1(9Z)/14:1(9Z))	HMDB0047885	Lipids and lipid-like molecules	Glycerolipids	Triradylcglycerols	M+H-H2O	C45H80O6	35	0	4.00145	2.00246	0.0230582	0.258434	-0.596326	0.661436	78532.6	118730	161221	115102	64848.6	60978.1	65469	61678.9	89915.1	85440.4	33978.3	46694.6	182062	150743	117574	118001	115737	150154	74509	81518.5	121680	75325.8
9.45_289.1423m/z	289.142	9.45177	pos	Matricin	HMDB0036643	Organoheterocyclic compounds	Lactones	Gamma butyrolactones	M+H-H2O	C17H22O5	35	0	-3.81754	1.22325	0.00146199	0.050847	0.514659	1.42866	38890.8	27221.9	27851.6	36374.9	39481.2	35584.1	32796.5	55563.8	32082.6	43648.3	40621.8	44903	17239.8	23360.2	24514.6	22783.7	25895.9	30584.6	34286.4	28522.7	27728.2	37303.3
5.67_683.4763m/z	683.476	5.67293	pos	5-Hydroxymethyl tolterodine	HMDB0013973	Benzenoids	Benzene and substituted derivatives	Diphenylmethanes	2M+H	C22H31NO2	34.9	0	-2.79944	1.34138	3.19856e-05	0.00753361	1.90732	3.75111	17561.8	4681.77	8690.02	9657.45	19579.6	14422.6	20373.6	26193.6	9811.2	29620.3	20531.1	16739.1	586.645	1724.42	4458.33	4229.3	4686.43	6341.13	6715.09	6274.47	4637.06	7164.87
9.60_543.3403m/z	543.34	9.59753	pos	1-(2-methoxy-6Z-heptadecenyl)-sn-glycero-3-phosphoserine	LMGP03060015	Lipids and lipid-like molecules	Glycerophospholipids	Glycerophosphoserines	M+NH4	C24H48NO9P	34.9	0	-0.39769	1.83871	0.0361481	0.324818	-2.38164	0.191891	10572.7	55097.1	9920.68	6982.41	11242.7	9906.68	29630.8	7789.54	4447.6	5144.46	9386.56	11275.1	18471.7	8681.94	47624.1	11761	50088.2	49382.3	161388	174329	8681.01	20563.5
7.31_886.5560n	909.545	7.3079	pos	PI(20:2(11Z,14Z)/18:2(9Z,12Z))	HMDB0009877	Lipids and lipid-like molecules	Glycerophospholipids	Glycerophosphoinositols	M+Na, M+K	C47H83O13P	34.8	0	-1.31512	1.62764	0.00110068	0.0426821	1.52618	2.88022	34423.9	11951.8	30142.4	24917	40295.7	40959.1	45683.4	44806	53128.5	16739.6	15178.9	32388.4	236.836	0.465453	9894.38	3.74188e-07	10883.3	3.74188e-07	24785.6	18055.9	15867.8	39794
15.99_226.9749m/z	226.975	15.9881	pos	oltipraz	96195	Unclassified	Unclassified	Unclassified	M+H	C8H6N2S3	34.7	3.83	-7.30752	1.14311	0.0327169	0.308915	-0.466862	0.723537	31041.7	42902.7	29213	16691.3	16942.4	41198.5	59710.4	34924	39912.4	25550.8	20326.8	25947.3	62190.1	50991.2	45250.1	47895.5	44749.1	36761.7	35038	38300.5	36619.2	31231.6
5.69_759.6401m/z	759.64	5.69057	pos	3-nonadecylphenol	LMPK15010006	Lipids and lipid-like molecules	Polyketides	Phenolic lipids	2M+K	C25H44O	34.7	0	-2.07405	1.46485	2.77899e-05	0.00719709	2.36656	5.15712	18397	3567.3	6479.03	7942.48	24796	13662.7	16370	28187.6	11833.4	28857	25372.6	20469	880.828	3009.3	3330.68	1934.01	3538.5	3671.93	3976.02	4319.04	5029.11	5983.59
6.68_880.5898m/z	880.59	6.67642	pos	PI(18:0/18:2(9Z,12Z))	HMDB0009809	Lipids and lipid-like molecules	Glycerophospholipids	Glycerophosphoinositols	M+NH4	C45H83O13P	34.7	0	-1.30817	1.44469	1.32985e-06	0.00227338	2.50944	5.694	16101.8	2827.86	13285.4	14534.6	12502.9	18560.6	20405.1	17268.3	21178.5	18461.6	16922.9	7898.61	59.0814	170.627	2371.01	129.287	2608.09	4.612	654.697	1782.04	13523.5	6975.67
7.85_909.5452m/z	909.545	7.85042	pos	PI(20:3(8Z,11Z,14Z)/18:1(9Z))	LMGP06010569	Lipids and lipid-like molecules	Glycerophospholipids	Glycerophosphoinositols	M+Na	C47H83O13P	34.7	0	-1.30448	1.54577	0.000684127	0.0336241	1.56125	2.9511	29611.5	10034.1	19979.9	28351.7	35888.8	37349.3	31932.5	40373.2	42304.4	15711	15780.5	28444.1	3.74188e-07	3.74188e-07	8303.84	3.74188e-07	9121.89	3.74188e-07	19810.1	12092.8	15186	35826.2
8.52_909.5451m/z	909.545	8.51833	pos	PI(22:4(7Z,10Z,13Z,16Z)/16:0)	HMDB0009914	Lipids and lipid-like molecules	Glycerophospholipids	Glycerophosphoinositols	M+Na	C47H83O13P	34.6	0	-1.41237	1.09854	0.000763118	0.0354728	1.87026	3.65598	14193.5	3882.26	9935.12	12010.3	19974.9	18993.6	17531.4	16924.1	23645.4	3549.05	4844.94	14526	301.156	3.74188e-07	3208.48	3.74188e-07	3529.33	3.74188e-07	7401.95	5828.93	3606.43	14946.3
3.48_223.0397n	241.074	3.47558	pos	Methyl 4-chloro-1H-indole-3-acetate	HMDB0032937	Organoheterocyclic compounds	Indoles and derivatives	Indolyl carboxylic acids and derivatives	M+H, M+NH4	C11H10ClNO2	34	0.0989	-1.30451	1.36463	0.000915384	0.038705	-0.284341	0.821117	65882.6	80235.3	71911.2	60760.6	60801.6	81954.8	63025.4	62052.8	72912.2	61457.5	68322.8	55626.7	92331.2	83652.4	80297.7	80691	81242.8	69711.3	83187.9	91208.4	66563.9	73466.6
7.89_925.5117m/z	925.512	7.88565	pos	Hoduloside V	HMDB0039074	Lipids and lipid-like molecules	Prenol lipids	Triterpenoids	M+H-H2O	C48H78O18	33.6	0	-4.06749	1.17405	0.00271664	0.0751899	1.41991	2.6757	19958.4	7459.13	14042.6	16073.3	23909.7	26432.7	26288	28047.3	28580.3	8902.22	12191.5	15116.1	3.74188e-07	3.74188e-07	6164.57	3.74188e-07	6781.03	289.14	14004.5	10028.7	9955.42	27367.9
8.95_288.1344m/z	288.134	8.95353	pos	10,11-Dihydroxycarbamazepine	HMDB0060568	Organoheterocyclic compounds	Benzazepines	Dibenzazepines	M+NH4	C15H14N2O3	33.1	0	0.398735	1.59978	0.0016002	0.0537214	0.322115	1.25016	91807.4	73436.4	90477.5	78262.8	81550.8	80469.8	82958.4	113659	88076.7	99699.2	110429	92491.1	54709.3	62239.2	69773.2	79082.3	72279.9	75416	88019.2	74628.1	77935	80282.1
14.42_196.0168m/z	196.017	14.4211	pos	m-Chlorohippuric acid	HMDB0001309	Benzenoids	Benzene and substituted derivatives	Benzoic acids and derivatives	M+H-H2O	C9H8ClNO3	32.8	0	3.60459	7.50496	0.00065042	0.0325023	-0.229104	0.853164	2.38355e+06	2.79378e+06	2.60346e+06	2.33238e+06	2.37296e+06	2.4817e+06	2.4712e+06	2.29298e+06	2.56145e+06	2.12341e+06	2.43224e+06	2.16374e+06	3.25621e+06	3.00019e+06	2.9262e+06	2.92719e+06	2.9166e+06	2.59281e+06	2.51882e+06	2.82258e+06	2.65879e+06	2.3184e+06
8.99_300.1345m/z	300.135	8.98595	pos	Tryptophyl-Hydroxyproline	HMDB0029084	Organic acids and derivatives	Carboxylic acids and derivatives	Amino acids, peptides, and analogues	M+H-H2O	C16H19N3O4	32.8	0	0.878658	1.14569	0.00341011	0.0876336	0.453067	1.36895	38298.2	27976.4	27269.9	42686.6	30143.2	46348.3	33124.8	38569	42673	34242.3	54723.7	33200.9	22055.5	27570.5	27498.6	28978	27571.8	29323.7	39691.4	24534.6	29472.8	23066.9
14.42_194.0215m/z	194.021	14.4211	pos	2-chloromuconic acid	LMFA01030967	Lipids and lipid-like molecules	Fatty Acyls	Fatty Acids and Conjugates	M+NH4	C6H5ClO4	32.5	0	-0.0659119	2.15841	0.000372484	0.0231858	-0.241191	0.846046	179114	211707	197759	178267	178414	181735	183319	178035	187560	159449	183677	162926	247431	228968	222097	218686	221784	195503	191406	214658	200227	176314
14.32_213.9828m/z	213.983	14.3191	pos	Chloroxine	HMDB0015373	Organoheterocyclic compounds	Quinolines and derivatives	Haloquinolines	M+H	C9H5Cl2NO	32.4	11.7	3.16938	2.77184	0.00164325	0.054816	-0.187939	0.877859	410179	467249	449053	403666	415223	417897	419697	406520	425359	373578	421801	368996	548022	492931	487452	484606	486398	437467	415245	463999	454353	402021
8.97_559.2995m/z	559.3	8.96955	pos	PG(20:2(11Z,14Z)/0:0)	LMGP04050024	Lipids and lipid-like molecules	Glycerophospholipids	Glycerophosphoglycerols	M+Na	C26H49O9P	32.2	0	-2.11318	2.28383	0.00451055	0.103181	0.236421	1.17807	285063	241975	224061	265870	273639	311398	293649	337260	288003	289101	331191	236457	222962	209670	231565	267107	238632	249529	264860	220881	259040	255507
15.86_130.9666m/z	130.967	15.8648	pos	2,2-Dichloro-1,1-ethanediol	70365	Organohalogen compounds	Halohydrins	Chlorohydrins	M+H	C2H4Cl2O2	32.1	8.19	3.48971	1.20055	7.97243e-05	0.0124025	-0.999748	0.500087	9092.21	18181.2	12503.9	5958.54	3216.98	8754.15	14000.2	7711.11	9070.32	10410.1	6776.18	12520.6	27633.4	23828	18720.3	19211	18585.4	15854.1	14558.7	16421	13641.3	13359.2
8.59_859.5315m/z	859.532	8.59457	neg	PI(16:0/20:3(8Z,11Z,14Z))	HMDB0009788	Lipids and lipid-like molecules	Glycerophospholipids	Glycerophosphoinositols	M-H	C45H81O13P	31.9	0	-3.10566	1.5335	0.0251184	0.269247	0.919832	1.8919	57530.2	30408.8	56079.3	76132.2	56288	64150.5	84770.2	39505.3	18911.6	21220	97724.6	60520.4	17046.2	3.74188e-07	28030.5	3.74188e-07	30833.5	63442.1	16862.7	36283.4	72649.8	38939.6
9.07_523.2991m/z	523.299	9.07118	pos	Tangeraxanthin	HMDB0039015	Lipids and lipid-like molecules	Prenol lipids	Triterpenoids	M+K	C34H44O2	30.7	0	3.78455	1.36648	0.016679	0.211447	0.398469	1.31811	75519.3	57293.7	71438.1	84633.5	80146.2	71197.1	63163.3	69897.7	59022.7	122002	66681.3	67011.2	45150.2	62878.6	50036.4	67659.5	52850.8	69334.2	69966.2	32126.1	56288.1	66647
9.97_815.6920m/z	815.692	9.9656	pos	TG(15:0/o-18:0/14:1(9Z))	HMDB0043807	Lipids and lipid-like molecules	Glycerolipids	Triradylcglycerols	M+K	C50H96O5	30.7	0	3.97113	1.67303	0.000488132	0.0275662	1.5754	2.98018	32794	11004	29792.1	32771.3	39069.8	37977.9	33899.8	39327.6	47555.6	7700.09	34190.7	25654.9	3.74188e-07	3.74188e-07	9094.23	3.74188e-07	10003.7	3.74188e-07	28023.2	10498.2	18746.7	33674.1
9.39_815.6925m/z	815.693	9.38598	pos	TG(14:1(9Z)/15:0/o-18:0)	HMDB0047769	Lipids and lipid-like molecules	Glycerolipids	Triradylcglycerols	M+K	C50H96O5	30.5	0	4.61905	1.12126	0.000138419	0.0148703	2.94235	7.6866	10611.1	1380.47	6789.84	9699.31	9824.73	18132.6	13927	12777.3	20310.8	1707.86	7078.23	5863.23	3.74188e-07	3.74188e-07	1140.88	3.74188e-07	1254.97	942.788	6353.6	3.74188e-07	2488.85	1623.57
8.95_547.2993m/z	547.299	8.95353	pos	PG(19:1(9Z)/0:0)	LMGP04050022	Lipids and lipid-like molecules	Glycerophospholipids	Glycerophosphoglycerols	M+Na	C25H49O9P	30.3	0	-2.54551	2.50505	0.00556387	0.115772	0.263368	1.20028	337376	281082	338558	322698	305121	272942	299539	425952	323435	397066	355742	332707	243214	251766	263385	297150	272875	263778	297073	262542	302525	356508

## Sheet: PBA0.1_Control
ID	m/z	Retention time (min)	Ion mode	Metabolites	Compound ID	Super Class	Class	Sub Class	Adducts	Formula	Score	Fragmentation Score	Mass Error (ppm)	VIP	P-value	adj.P-value	log2(FC)	FC	average(PBA0.1)	average(Control)	PBA01-1	PBA01-2	PBA01-3	PBA01-4	PBA01-5	PBA01-6	PBA01-7	PBA01-8	PBA01-9	PBA01-10	Control-1	Control-2	Control-3	Control-4	Control-5	Control-6	Control-7	Control-8	Control-9	Control-10
8.92_477.2856n	476.278	8.9224	neg	LysoPE(18:2(9Z,12Z)/0:0)	HMDB0011507	Lipids and lipid-like molecules	Glycerophospholipids	Glycerophosphoethanolamines	M-H, 2M-H	C23H44NO7P	57.3	88.7	0.0306411	5.34573	0.00501635	0.107154	-0.422298	0.746235	1.14665e+06	1.53658e+06	1.24873e+06	1.491e+06	1.48693e+06	1.44697e+06	1.22841e+06	933415	766800	747594	1.11288e+06	1.00376e+06	1.33832e+06	1.60657e+06	1.40713e+06	1.39105e+06	1.46235e+06	1.76515e+06	2.16734e+06	1.28674e+06	1.56887e+06	1.37225e+06
7.10_318.3001m/z	318.3	7.09627	pos	17-hydroxy stearic acid	LMFA02000135	Lipids and lipid-like molecules	Fatty Acyls	Octadecanoids	M+NH4	C18H36O3	57	88.4	-0.448351	1.52966	0.000363509	0.025346	-0.361994	0.778088	94324.8	121226	95190.3	97717.2	112041	115169	99391.9	113440	80514	67025.9	81226	81532.3	128377	131765	122583	121532	119146	129250	109764	97938.5	122376	129533
8.94_502.2923m/z	502.292	8.93805	pos	LysoPE(0:0/20:4(8Z,11Z,14Z,17Z))	HMDB0011488	Lipids and lipid-like molecules	Glycerophospholipids	Glycerophosphoethanolamines	M+H	C25H44NO7P	56.8	87.5	-1.11484	7.97323	0.0168141	0.199228	-0.407179	0.754096	3.23372e+06	4.2882e+06	3.20274e+06	3.17612e+06	3.9953e+06	5.35023e+06	3.8179e+06	2.31752e+06	2.31159e+06	1.98779e+06	3.09548e+06	3.08254e+06	4.21085e+06	4.48411e+06	4.05655e+06	4.46463e+06	4.13479e+06	4.91746e+06	6.05176e+06	3.28853e+06	3.96629e+06	3.30707e+06
8.94_500.2784m/z	500.278	8.93803	neg	LysoPE(20:4(5Z,8Z,11Z,14Z)/0:0)	HMDB0011517	Lipids and lipid-like molecules	Glycerophospholipids	Glycerophosphoethanolamines	M-H	C25H44NO7P	56.7	86.5	0.299503	6.16562	0.0151569	0.18772	-0.388297	0.764031	1.98661e+06	2.60017e+06	2.08491e+06	1.98396e+06	2.47176e+06	3.13135e+06	2.36765e+06	1.55098e+06	1.40055e+06	1.23815e+06	2.00384e+06	1.63296e+06	2.47728e+06	2.75374e+06	2.49247e+06	2.59408e+06	2.51924e+06	2.98998e+06	3.57804e+06	2.05968e+06	2.4994e+06	2.03778e+06
4.78_297.0979m/z	297.098	4.77917	neg	2-Phenylethanol glucuronide	HMDB0010350	Organic oxygen compounds	Organooxygen compounds	Carbohydrates and carbohydrate conjugates	M-H	C14H18O7	56.1	83.4	-0.207232	1.33859	0.00573392	0.114387	-1.04664	0.484096	26395.4	54525.1	31525	44431.3	17471.6	31206.3	28617.6	2567.51	26875.8	27731.7	27929.9	25597.1	2634.61	40206.2	45783	54995.8	49759.1	103199	40809.3	71531.9	67139.8	69193
9.07_619.2890m/z	619.289	9.07025	neg	1-Arachidonoylglycerophosphoinositol	HMDB0061690	Lipids and lipid-like molecules	Glycerophospholipids	Glycerophosphoinositols	M-H	C29H49O12P	55.7	80.5	0.22394	6.87345	0.00182863	0.0654831	-0.566621	0.675196	1.22716e+06	1.81748e+06	1.49092e+06	1.01755e+06	1.57217e+06	1.61547e+06	1.23845e+06	995691	995739	762111	1.36817e+06	1.21528e+06	1.31487e+06	2.10385e+06	1.68411e+06	1.93144e+06	1.75445e+06	1.56789e+06	2.75799e+06	1.48102e+06	1.47707e+06	2.10212e+06
9.07_620.2958n	603.292	9.07118	pos	PI(20:4(5Z,8Z,11Z,14Z)/0:0)	LMGP06050006	Lipids and lipid-like molecules	Glycerophospholipids	Glycerophosphoinositols	M+H-H2O, M+Na, M+NH4, M+H	C29H49O12P	55.7	81.8	-0.631871	5.33681	0.000277747	0.0225037	-0.629776	0.646277	601058	930033	678501	508622	744548	756527	602911	423520	504842	391897	669103	730113	719993	1.10307e+06	862736	1.02877e+06	899158	766846	1.31337e+06	807879	764239	1.03426e+06
9.23_504.3085m/z	504.308	9.22518	pos	LysoPE(20:3(11Z,14Z,17Z)/0:0)	HMDB0011514	Lipids and lipid-like molecules	Glycerophospholipids	Glycerophosphoethanolamines	M+H	C25H46NO7P	55.4	85.8	0.0389925	2.41285	0.00218166	0.0720743	-0.524307	0.695293	168541	242403	192067	209187	206829	226581	193485	119616	101151	129898	166827	139769	201957	233662	221302	194221	230577	297096	357744	238583	224092	224795
9.02_595.2892m/z	595.289	9.01925	neg	PI(18:2(9Z,12Z)/0:0)	LMGP06050010	Lipids and lipid-like molecules	Glycerophospholipids	Glycerophosphoinositols	M-H	C27H49O12P	55.2	82.5	0.55994	2.41556	0.00373082	0.0903307	-0.494033	0.710038	188139	264970	169651	208977	195666	192000	163152	199301	164551	130326	236591	221173	225266	269915	242019	324044	254820	235615	416967	188262	209424	283370
0.75_161.1051n	162.112	0.752683	pos	L-Carnitine	34532	Organic nitrogen compounds	Organonitrogen compounds	Quaternary ammonium salts	M+H, 2M+H	C7H15NO3	55.1	84.2	-0.337414	5.4081	0.00333442	0.0863698	0.374916	1.29676	1.62346e+06	1.25193e+06	1.30392e+06	1.3525e+06	1.74329e+06	1.71203e+06	1.84481e+06	1.31395e+06	1.68901e+06	1.9832e+06	1.84358e+06	1.44834e+06	1.36922e+06	1.40186e+06	1.22935e+06	1.40743e+06	1.26045e+06	1.20017e+06	1.58412e+06	664145	1.2616e+06	1.141e+06
10.92_803.5441n	804.551	10.9161	pos	PC(16:1(9Z)/22:6(4Z,7Z,10Z,13Z,16Z,19Z))	LMGP01010696	Lipids and lipid-like molecules	Glycerophospholipids	Glycerophosphocholines	M+H, M+Na	C46H78NO8P	54.7	89.7	-2.93591	11.8458	0.0286468	0.24381	-0.696133	0.617225	3.66428e+06	5.9367e+06	2.16108e+06	2.19991e+06	5.90098e+06	4.89893e+06	3.93305e+06	3.98961e+06	4.06778e+06	5.17599e+06	3.3098e+06	1.00562e+06	9.31184e+06	1.18257e+06	6.82723e+06	5.96074e+06	6.34321e+06	3.34315e+06	9.85793e+06	5.66779e+06	4.06637e+06	6.80616e+06
5.23_255.0651m/z	255.065	5.23198	pos	Daidzein	43572	Phenylpropanoids and polyketides	Isoflavonoids	Isoflav-2-enes	M+H	C15H10O4	54.7	76.8	-0.347568	1.05765	0.00644127	0.120539	-0.837564	0.559588	21260.5	37993.1	27226.2	34433.2	8480.53	3387.31	29790.3	24584.6	20989.3	29339	19301.4	15073	26334.2	27809.5	33017.4	27462.4	35657.9	51504.5	52661.1	63681.9	41681.1	20121.4
0.71_174.1116n	175.119	0.70895	pos	L-Arginine	13	Organic acids and derivatives	Carboxylic acids and derivatives	Amino acids, peptides, and analogues	M+K, M+H	C6H14N4O2	54.4	79.7	-0.558778	2.643	0.00785448	0.132691	0.322692	1.25066	533634	426681	533550	554807	582690	585885	549786	506679	591196	686013	435422	310307	492268	364890	417595	385437	414899	415463	374274	413227	505978	482778
10.92_806.5680m/z	806.568	10.9161	pos	PC(22:5(4Z,7Z,10Z,13Z,16Z)/16:1(9Z))	HMDB0008660	Unclassified	Unclassified	Unclassified	M+H	C46H80NO8P	54.3	86	-1.72549	15.9631	0.0262057	0.233008	-0.609722	0.655323	9.14365e+06	1.39529e+07	8.56748e+06	2.92308e+06	1.34147e+07	1.12934e+07	9.43669e+06	8.96215e+06	9.49557e+06	1.22544e+07	1.03265e+07	4.76262e+06	2.62332e+07	5.29888e+06	1.55746e+07	1.71459e+07	1.47507e+07	1.15378e+07	1.30292e+07	1.37627e+07	1.14309e+07	1.07651e+07
9.76_507.2730m/z	507.273	9.76287	neg	PG(18:2(9Z,12Z)/0:0)	LMGP04050014	Lipids and lipid-like molecules	Glycerophospholipids	Glycerophosphoglycerols	M-H	C24H45O9P	54	79.1	0.336265	1.07883	0.0140367	0.182251	-0.446516	0.733813	49915.7	68022.3	40013	56737.4	65798.1	55596.3	42202.1	31334.1	32005.9	28990.8	75430.5	71048.4	54192.2	68228.8	62974.3	63420.2	64633.5	52919.8	93566	80589.7	71070.3	68628.3
0.71_257.1027n	280.092	0.70895	pos	Glycerophosphocholine	HMDB0000086	Lipids and lipid-like molecules	Glycerophospholipids	Glycerophosphocholines	M+Na, M+K, 2M+Na	C8H20NO6P	53.7	71.3	-0.654542	6.33141	0.00464815	0.103743	0.697392	1.62157	1.61641e+06	996820	1.41627e+06	1.1425e+06	1.84857e+06	1.79715e+06	1.70251e+06	2.0574e+06	1.54663e+06	666781	2.40242e+06	1.58393e+06	1.05237e+06	877781	881111	883423	912953	1.00121e+06	1.2005e+06	371873	926428	1.86055e+06
7.41_372.2662n	373.274	7.41382	pos	3alpha-Hydroxy-5beta-chola-7,9(11)-dien-24-oic Acid	LMST04010330	Lipids and lipid-like molecules	Sterol Lipids	Bile acids and derivatives	M+H-H2O, M+H	C24H36O3	53.3	70.7	-0.524693	2.99132	0.0193235	0.211989	-1.42905	0.371376	88367.6	237946	310808	219621	43334.6	18665.3	42191.4	34182.8	45604.2	73355.5	47411.2	48501.8	176975	136284	206498	322932	217396	237155	77671	641649	222888	140014
6.46_372.2663n	373.274	6.46475	pos	(20S)-3beta-Hydroxychola-5,16-dien-24-oic Acid	LMST04010437	Lipids and lipid-like molecules	Sterol Lipids	Bile acids and derivatives	M+H-H2O, M+H	C24H36O3	52.9	68.8	-0.310599	1.26599	0.000252534	0.0208851	-1.19924	0.435505	15733.6	36127.3	29964	33994.9	14023.4	10704.4	4512.33	7327.83	8167.76	26874.2	11311.3	10456.2	32835.5	21744.8	31094.7	42030.6	32982.2	48383.8	34478.6	28262.9	54067.3	35392.4
7.29_406.2721n	451.27	7.28657	neg	3-Oxocholic acid	HMDB0000502	Lipids and lipid-like molecules	Steroids and steroid derivatives	Bile acids, alcohols and derivatives	M+FA-H, 2M-H, M-H	C24H38O5	52.9	65.8	0.395165	1.86934	0.0479503	0.30703	-1.17774	0.442043	58285.3	131854	97618.5	204551	35597.7	31983.3	13915.2	9253.12	12382.8	137648	20421.9	19481.7	195298	117585	116346	327912	120675	198103	53802	51762.5	81568.7	55489.9
8.09_386.2305n	385.223	8.08943	neg	10,11-dihydro-20-trihydroxy-leukotriene B4	HMDB0012503	Lipids and lipid-like molecules	Fatty Acyls	Eicosanoids	M-H, 2M-H	C20H34O7	52.9	68.5	0.182103	3.39015	0.0354954	0.268399	0.595258	1.51074	488317	323229	328431	209899	517675	570277	747461	400211	532323	458941	580946	537001	201521	401912	294194	334229	313094	710493	330979	34831	404062	206979
9.35_358.3676m/z	358.368	9.35377	pos	Behenic acid	LMFA01010022	Lipids and lipid-like molecules	Fatty Acyls	Fatty Acids and Conjugates	M+NH4	C22H44O2	52.6	69	-1.03406	3.99992	0.00261829	0.0781337	-0.372867	0.772246	642731	832287	590729	620382	602973	688294	608755	716477	630903	720224	582849	665723	764401	965994	859491	703222	848198	696010	1.16459e+06	685643	658237	977081
8.84_392.2928n	437.291	8.83937	neg	Deoxycholic acid	265	Lipids and lipid-like molecules	Steroids and steroid derivatives	Bile acids, alcohols and derivatives	M+FA-H, 2M-H, M-H	C24H40O4	52.4	69.5	0.414379	1.44931	0.0426608	0.290747	-1.30064	0.405946	24093.4	59351.3	21909.7	67796.3	7475.45	3.74188e-07	1432.22	12543.2	15117.4	22050.1	44894.4	47715.7	23950.5	57328.9	61905.7	41297.4	61477.7	27907.8	36624.2	184357	42552.2	56111.8
9.58_621.3049m/z	621.305	9.57928	neg	PI(20:3(8Z,11Z,14Z)/0:0)	LMGP06050021	Lipids and lipid-like molecules	Glycerophospholipids	Glycerophosphoinositols	M-H	C29H51O12P	52.3	67.2	0.525122	2.02697	0.0076479	0.131263	-0.609215	0.655553	107030	163267	174467	109575	141412	121394	109076	71273.2	79536.7	48617.8	111793	103156	103102	162028	143663	156521	155456	157871	271823	132452	136129	213621
9.66_382.2717n	400.306	9.65837	pos	14-F2-dihomo-IsoP	LMFA03110169	Lipids and lipid-like molecules	Fatty Acyls	Eicosanoids	M+NH4, M+K, M+Na, M+H	C22H38O5	52.1	65.7	-0.49924	8.51179	0.00902577	0.141724	-5.38659	0.0239042	24810	1.03789e+06	19475.7	20857.6	25161.1	17690.2	22567	35846.1	28603.4	29456.3	20469.7	27972.8	320273	1.21464e+06	1.26875e+06	200984	1.25085e+06	313234	805177	3.92874e+06	472760	603535
8.82_330.3363m/z	330.336	8.81952	pos	N,N-dimethyl-Safingol	53956	Unclassified	Unclassified	Unclassified	M+H	C20H43NO2	52	65.9	-1.04721	1.72014	0.00555024	0.11211	-0.221395	0.857735	227582	265328	230748	207056	192330	227918	263165	257740	225328	246168	200934	224428	272688	254627	275689	235958	274347	278425	275808	245215	215233	325293
10.10_352.2610n	370.295	10.1025	pos	MG(18:3(6Z,9Z,12Z)/0:0/0:0)	HMDB0011569	Lipids and lipid-like molecules	Fatty Acyls	Lineolic acids and derivatives	M+H, M+NH4, M+K	C21H36O4	51.8	64.8	-0.885673	2.5354	0.0223451	0.222883	-0.17627	0.884988	779322	880602	715799	849247	718585	737022	676704	794122	733277	935257	724752	908458	988006	1.00106e+06	932440	906827	924748	739211	905201	859435	745800	803295
3.36_366.1427n	367.15	3.35712	pos	Tetrahydropentoxyline	HMDB0029992	Alkaloids and derivatives	Harmala alkaloids	Unclassified	M+H, M+Na, M+H-H2O	C17H22N2O7	51.7	62.9	0.0835924	1.10686	0.0416217	0.287514	-0.550297	0.68288	39464.8	57791.7	69835.9	64187.6	70693.4	40065.3	42826	30547.2	40015.1	26146.3	5451.21	4879.71	51840.6	52653	58358.5	51958.1	57958.1	50260.6	78428.2	59677.9	41548.8	75233
7.06_230.2477m/z	230.248	7.06188	pos	Xestoaminol C	53933	Unclassified	Unclassified	Unclassified	M+H	C14H31NO	51.3	59	-0.399327	2.26241	0.0056387	0.113266	-0.266572	0.831292	338243	406888	353113	377014	346301	440670	356085	361434	309267	223654	315942	298946	336826	482202	389761	396347	403352	427480	440529	377223	421375	393783
6.46_408.2877n	453.286	6.45687	neg	Cholic acid	LMST04010001	Lipids and lipid-like molecules	Sterol Lipids	Bile acids and derivatives	M+FA-H, 2M-H, M-H	C24H40O5	50.5	56	0.395725	1.78757	0.000482881	0.0301863	-1.25436	0.419181	30492.1	72742.2	60776	72795.4	24563	18264.8	8049.34	14370.6	13128.5	51703.9	21252.2	20017.4	64517	44380.3	62399	86541.5	66207.5	105286	67716.1	50508.2	111332	68534.2
1.11_204.1230m/z	204.123	1.1106	pos	L-Acetylcarnitine	HMDB0000201	Lipids and lipid-like molecules	Fatty Acyls	Fatty acid esters	M+H	C9H17NO4	50.2	52.4	-0.234927	3.93303	0.0482135	0.307548	0.161986	1.11883	2.93626e+06	2.62442e+06	2.49153e+06	2.92886e+06	3.34782e+06	2.74533e+06	3.17818e+06	2.78654e+06	2.68372e+06	3.65424e+06	3.08602e+06	2.4604e+06	2.56106e+06	2.37994e+06	2.6224e+06	2.08136e+06	2.54919e+06	2.71314e+06	3.08396e+06	2.75899e+06	2.70199e+06	2.79211e+06
0.63_308.1583n	309.165	0.6342	pos	1-[(5-Amino-5-carboxypentyl)amino]-1-deoxyfructose	HMDB0034879	Organic oxygen compounds	Organooxygen compounds	Carbohydrates and carbohydrate conjugates	M+H-H2O, M+H	C12H24N2O7	50.1	54.6	-0.0430552	1.49906	0.00683788	0.124452	-0.611518	0.654507	57792.3	88299	94114.5	74859.2	87114.4	76502	75752.1	47090.7	67518.5	33290.1	11191.7	10490	88489	91840.5	84035.6	88820.6	85821.9	101473	95144.6	74550.9	77266	95547.2
11.56_284.2945m/z	284.294	11.5646	pos	Safingol ( L-threo-sphinganine)	LMSP01080055	Lipids and lipid-like molecules	Sphingolipids	Sphingoid bases	M+H-H2O	C18H39NO2	49.2	51.1	-0.968571	1.74134	0.0218621	0.221165	-0.392961	0.761565	142599	187245	136352	150406	141789	159751	155216	126317	106039	113867	119347	216906	152589	260491	184143	143886	183282	184993	250601	149680	129106	233676
2.31_120.0810m/z	120.081	2.30533	pos	Tyramine	HMDB0000306	Benzenoids	Benzene and substituted derivatives	Phenethylamines	M+H-H2O	C8H11NO	49.2	56.3	1.42413	1.33986	0.00904048	0.141724	0.246704	1.18649	196093	165271	211367	196442	213725	158162	186420	182092	239819	188594	220782	163530	149875	150900	165474	138816	156766	163477	198863	164285	157993	206263
1.17_343.1266n	344.134	1.17263	pos	N-(1-Deoxy-1-fructosyl)tyrosine	HMDB0037845	Organic acids and derivatives	Carboxylic acids and derivatives	Amino acids, peptides, and analogues	M+H-H2O, M+H	C15H21NO8	48.8	50.4	-0.440929	1.40738	0.0255119	0.231809	-0.659842	0.632948	49123.1	77610.1	91302.2	84372.1	78886.9	54885.3	72983.3	36183.7	47096.4	18104.5	4849.58	2567.18	67251.8	62262.1	75830.7	56781.1	76828.9	89615.8	91919.3	75667.8	66455.2	113488
10.55_811.6061n	834.599	10.5522	pos	PC(20:0/18:3(6Z,9Z,12Z))	HMDB0008271	Lipids and lipid-like molecules	Glycerophospholipids	Glycerophosphocholines	M+H-H2O, M+Na	C46H86NO8P	48.5	57.5	-3.69479	19.2755	0.0232718	0.225004	-0.519442	0.697641	1.48428e+07	2.12757e+07	1.39544e+07	1.91636e+07	5.18715e+06	1.29782e+07	1.07819e+07	1.34883e+07	1.25792e+07	1.71987e+07	1.47071e+07	2.83893e+07	3.21779e+07	2.80659e+07	2.0355e+07	2.45309e+07	2.17732e+07	1.82178e+07	2.01338e+07	1.65976e+07	1.55584e+07	1.53463e+07
9.60_690.4547n	708.489	9.59753	pos	Butyl 4'-O-butanoyl-6-O-hexadecanoyl-neohesperidoside	LMSL05000005	Lipids and lipid-like molecules	Saccharolipids	Other acyl sugars	M+NH4, M+K, M+Na, M+H	C36H66O12	47.8	41.1	-1.02446	22.1028	0.0371395	0.273675	-7.61384	0.00510511	42185	8.26328e+06	33314.5	6613.17	84782.4	1554.47	59586.3	64562.9	69282.6	63341.6	15949.3	22862.5	1.437e+06	5.95531e+06	1.0106e+07	1.22554e+06	9.86214e+06	1.95593e+06	5.83395e+06	3.98289e+07	2.85394e+06	3.57408e+06
8.34_437.1932m/z	437.193	8.34357	pos	Armillaripin	HMDB0030404	Lipids and lipid-like molecules	Prenol lipids	Sesquiterpenoids	M+Na	C24H30O6	47.7	43.3	-0.570323	1.74377	0.033892	0.262573	-0.312152	0.805439	281257	349197	296261	238558	263402	295188	333523	242970	291958	205339	321387	323983	452538	265430	341052	374135	353548	270127	273718	440537	469467	251415
10.69_256.2632m/z	256.263	10.6908	pos	Palmitic amide	HMDB0012273	Lipids and lipid-like molecules	Fatty Acyls	Fatty amides	M+H	C16H33NO	46.8	38.2	-1.15341	4.42896	0.0091835	0.142753	-0.304475	0.809737	1.04077e+06	1.28532e+06	1.09781e+06	977775	1.03074e+06	1.13289e+06	1.10878e+06	1.23749e+06	915343	983516	920694	1.00268e+06	1.19486e+06	1.45924e+06	1.29311e+06	1.08482e+06	1.2801e+06	1.23926e+06	1.7178e+06	1.09976e+06	901446	1.58281e+06
11.17_325.1843m/z	325.184	11.1653	neg	2-Dodecylbenzenesulfonic acid	HMDB0031031	Benzenoids	Benzene and substituted derivatives	Benzenesulfonic acids and derivatives	M-H	C18H30O3S	46.5	41	0.121391	4.01282	0.0396542	0.281931	-0.296345	0.814313	1.04519e+06	1.28352e+06	1.14755e+06	1.34316e+06	917824	998647	872067	943068	994659	1.17138e+06	1.01281e+06	1.0507e+06	1.1193e+06	1.26152e+06	1.2891e+06	1.01917e+06	1.29771e+06	997102	1.76307e+06	1.87522e+06	966539	1.24647e+06
9.68_311.1687m/z	311.169	9.6792	neg	N-Undecylbenzenesulfonic acid	HMDB0032549	Benzenoids	Benzene and substituted derivatives	Benzenesulfonic acids and derivatives	M-H	C17H28O3S	46.4	39.5	0.19225	3.74074	0.0440503	0.295253	-0.278905	0.824216	1.05048e+06	1.27452e+06	1.13861e+06	1.14087e+06	909009	1.01226e+06	917228	1.01537e+06	1.0505e+06	1.3087e+06	1.03756e+06	974734	1.1522e+06	1.12255e+06	1.30347e+06	1.04564e+06	1.29989e+06	1.03474e+06	1.5828e+06	1.98781e+06	994139	1.22201e+06
10.06_616.4181n	634.452	10.0582	pos	Nonoxynol-9	HMDB0015680	Organic oxygen compounds	Organooxygen compounds	Ethers	M+NH4, M+Na, M+H	C33H60O10	45.4	36	-0.844786	5.64873	0.0197071	0.213765	-0.191863	0.875474	3.89412e+06	4.44801e+06	3.56395e+06	3.5668e+06	3.75232e+06	3.94291e+06	3.78677e+06	4.11985e+06	4.16524e+06	4.50628e+06	3.51908e+06	4.01795e+06	4.49324e+06	4.26645e+06	4.68033e+06	4.409e+06	4.67528e+06	3.97665e+06	4.05601e+06	5.94678e+06	4.23568e+06	3.74066e+06
9.56_297.2435m/z	297.244	9.56253	neg	cis-9,10-Epoxystearic acid	36008	Unclassified	Unclassified	Unclassified	M-H	C18H34O3	45.4	33	0.0587363	1.08898	0.00212379	0.0709788	-0.773418	0.58503	22018.6	37636.6	17312.9	26502.7	20798.2	16597.9	26925.8	16346.8	13152.5	21349.6	31494.5	29704.7	51527.1	50055.2	35122.3	19005.6	35451.8	29495	28148.6	57561.8	41310.8	28688.3
8.87_619.2891m/z	619.289	8.87128	neg	1-arachidonoyl-sn-glycero-3-phospho-1D-myo-inositol	HMDB0062722	Lipids and lipid-like molecules	Glycerophospholipids	Glycerophosphoinositols	M-H	C29H49O12P	45	33.9	0.351369	2.17467	0.0001769	0.0172187	-0.596353	0.661424	103471	156436	107604	83175.3	120181	138356	109426	104072	89854	78798.7	110773	92469	115776	179956	150319	168815	152729	128408	218552	128317	143451	178041
1.10_192.0270n	215.016	1.09608	pos	Citric acid	HMDB0000094	Organic acids and derivatives	Carboxylic acids and derivatives	Tricarboxylic acids and derivatives	M+H, M+K, M+Na, M+NH4	C6H8O7	44.4	24.7	0.147695	1.39512	0.0218943	0.221165	-0.325216	0.798179	132735	166297	122493	166346	123238	131583	163633	114696	129714	66063	165395	144183	190600	159566	159283	166255	161668	238875	140270	162091	144783	139576
3.43_187.0633n	188.071	3.42683	pos	Indoleacrylic acid	HMDB0000734	Organoheterocyclic compounds	Indoles and derivatives	Indoles	M+H, M+H-H2O	C11H9NO2	44.1	32.9	-0.368348	4.71094	0.0400174	0.283097	0.279139	1.21347	2.23769e+06	1.84404e+06	2.39068e+06	2.23199e+06	2.48724e+06	1.66296e+06	1.61654e+06	1.54541e+06	2.1195e+06	2.4845e+06	3.21852e+06	2.61956e+06	1.53503e+06	1.85334e+06	1.8232e+06	1.95489e+06	1.77044e+06	1.70498e+06	2.3216e+06	1.77909e+06	1.75609e+06	1.94175e+06
0.71_161.1051n	184.094	0.70895	pos	Malonyl-Carnitin	HMDB0062496	Organic nitrogen compounds	Organonitrogen compounds	Quaternary ammonium salts	M+Na, M+K	C7H15NO3	44	24.4	-0.43739	2.16658	0.00518854	0.108582	2.22063	4.66096	80213.4	17209.6	43176.9	41660.5	146652	30367	65091.9	41865.5	58315.5	21635.5	197750	155620	21448.8	19015.3	14742.8	25277.8	15713.3	10158	15065.2	2423.72	25397.8	22853.7
0.75_117.0789n	257.147	0.752683	pos	Betaine	HMDB0000043	Organic acids and derivatives	Carboxylic acids and derivatives	Amino acids, peptides, and analogues	M+Na, 2M+Na, 2M+H	C5H11NO2	43.8	20.8	-0.434379	4.35988	0.00764684	0.131263	1.20205	2.30066	571496	248405	923645	1.28528e+06	374457	690347	540441	388656	503551	258427	455133	295024	420506	111592	213594	208300	229981	471991	131696	218877	318310	159206
11.15_293.1793m/z	293.179	11.1487	neg	Sodium Tetradecyl Sulfate	HMDB0014607	Organic acids and derivatives	Organic sulfuric acids and derivatives	Sulfuric acid esters	M-H	C14H30O4S	43.8	27.1	0.299422	4.67972	0.0374541	0.27448	-2.04045	0.243088	117192	482097	131755	145231	106470	116812	97061.9	102129	127960	115929	113934	114639	167272	415736	512800	151956	519679	202610	401162	1.89167e+06	235937	322145
7.41_408.2877n	453.286	7.40897	neg	Alpha-Muricholic acid	HMDB0000506	Lipids and lipid-like molecules	Steroids and steroid derivatives	Bile acids, alcohols and derivatives	M+FA-H, 2M-H, M-H	C24H40O5	43.5	21.8	0.382867	4.15252	0.0225759	0.223181	-1.40191	0.378429	178596	471940	663877	458967	86635.8	35136.4	80024.2	73621.6	82822.7	135209	87033.4	82628.7	332882	273430	410626	655020	430889	468748	145083	1.25658e+06	452324	293820
14.19_128.1183m/z	128.118	14.1933	pos	Galegine	66896	Unclassified	Unclassified	Unclassified	M+H	C6H13N3	43.4	20.7	0.632402	1.08256	0.0269791	0.23571	-0.174875	0.885844	186367	210383	185486	186781	172481	180209	172128	148919	183690	209725	179486	244761	239500	230294	218270	215740	217689	201180	189070	211852	203437	176800
3.42_360.0856m/z	360.086	3.4227	neg	S-Lactoylglutathione	HMDB0001066	Organic acids and derivatives	Carboxylic acids and derivatives	Amino acids, peptides, and analogues	M-H2O-H	C13H21N3O8S	43.4	29.5	-3.87776	1.74457	0.00495847	0.106537	-0.801271	0.573843	47975.9	83604.5	74657.3	69501.1	72382.7	62987.5	65734.6	51839.1	40948.5	39360.6	1167.81	1179.59	80154.1	72336.8	85873.7	64594.7	87501.6	67047.6	101711	107301	48455.1	121069
10.12_396.2872n	414.321	10.1171	pos	PGF2alpha isopropyl ester	LMFA03010076	Lipids and lipid-like molecules	Fatty Acyls	Eicosanoids	M+NH4, M+Na, M+K, M+H	C23H40O5	42.6	20.8	-0.848208	4.20352	0.0116935	0.166103	-0.136602	0.909659	2.79314e+06	3.07053e+06	2.58523e+06	2.741e+06	2.64018e+06	2.8296e+06	2.569e+06	2.91013e+06	2.78192e+06	3.30264e+06	2.57793e+06	2.99376e+06	3.2977e+06	3.2724e+06	3.21998e+06	3.12065e+06	3.21039e+06	2.77886e+06	2.94947e+06	3.23391e+06	2.83301e+06	2.78895e+06
0.84_347.0232m/z	347.023	0.843233	neg	Dehydro-L-(+)-ascorbic acid dimer	45119	Unclassified	Unclassified	Unclassified	M-H	C12H12O12	41.9	30	-6.98547	1.136	0.0281161	0.241283	-0.744733	0.596778	30875	51736.1	44419.4	41009.6	20501.5	20980.1	42505.9	42223.9	28392.3	10630.3	31305.7	26781.1	59959.3	23954.6	51507.9	34815	48155.3	107775	44565.2	38605.6	29855.8	78167.6
13.12_419.3153m/z	419.315	13.1196	pos	Hexadecyl ferulate	HMDB0039317	Phenylpropanoids and polyketides	Cinnamic acids and derivatives	Hydroxycinnamic acids and derivatives	M+H	C26H42O4	41.9	18	-0.724729	1.88848	0.0428133	0.291513	-0.251599	0.839965	411930	490413	491081	396512	352959	330052	340687	347557	398702	468263	466437	527047	679624	566264	500240	522031	498834	480825	387046	431081	463981	374206
6.34_469.1105m/z	469.111	6.34127	pos	3,6,7-Trihydroxy-4'-methoxyflavone 7-rhamnoside	HMDB0041455	Phenylpropanoids and polyketides	Flavonoids	Flavonoid glycosides	M+Na	C22H22O10	41.9	12.1	0.0497178	1.08685	0.00783263	0.132691	-0.396711	0.759588	54153.4	71293.1	47954.5	52716.2	50567	55462.6	46712.8	95294.3	55509.1	26447.5	47850.5	63019.2	71504.1	77596.6	66591	82758.5	70308.6	70095.6	70735.1	69763.9	70331.7	63245.8
10.10_484.3397n	502.373	10.1025	pos	(25S)-5alpha-cholestan-3beta,4beta,6alpha,8beta,15alpha,16beta,26-heptol	LMST01010328	Lipids and lipid-like molecules	Sterol Lipids	Sterols	M+NH4, M+Na, M+K, M+H	C27H48O7	41.1	12.7	-0.714749	4.85695	0.0183613	0.207795	-0.130862	0.913286	4.46399e+06	4.88784e+06	4.21389e+06	4.05593e+06	4.30026e+06	4.61193e+06	4.31548e+06	4.76898e+06	4.58359e+06	5.17717e+06	4.06585e+06	4.54685e+06	5.12162e+06	4.90818e+06	5.10249e+06	4.93248e+06	5.09939e+06	4.55416e+06	4.51017e+06	5.61534e+06	4.75963e+06	4.27493e+06
0.71_156.0420m/z	156.042	0.70895	pos	5-amino-pentanoic acid	LMFA01100040	Lipids and lipid-like molecules	Fatty Acyls	Fatty Acids and Conjugates	M+K	C5H11NO2	40.9	11	-0.76945	2.94598	4.76509e-06	0.0030047	2.14154	4.41233	122236	27703.4	141764	217583	112163	105040	108604	80224.4	92475.3	70615.9	171403	122491	55630.3	15768.9	23422.1	24009.6	25228.2	30975.1	14231.2	15102.7	47009.2	25656.7
14.03_157.0511m/z	157.051	14.027	neg	2-(Methoxymethyl)furan	HMDB0034247	Organoheterocyclic compounds	Heteroaromatic compounds	Unclassified	M+FA-H	C6H8O2	40.6	12	4.52099	1.69897	0.0164746	0.196489	0.152672	1.11163	445240	400530	410889	416480	415406	458891	412269	462968	445625	486097	390406	553366	423448	397942	426072	385321	422709	375156	368685	429828	396314	379823
0.74_177.1346m/z	177.135	0.737967	pos	Dimethylurea	HMDB0029198	Organic acids and derivatives	Organic carbonic acids and derivatives	Ureas	2M+H	C3H8N2O	40.3	4.48	-0.0326632	5.3408	3.12798e-05	0.00824819	-5.66962	0.019646	6318.34	321610	4110.24	2747.96	9546.88	2833.98	9317.79	8043.73	3740.84	15775.9	4200.35	2865.75	140802	359478	316518	431760	335097	269854	286580	755659	203442	116913
1.10_381.0300m/z	381.03	1.09818	neg	hesperetin 3'-O-sulfate	HMDB0029202	Phenylpropanoids and polyketides	Flavonoids	O-methylated flavonoids	M-H	C16H14O9S	40.3	21.7	3.6486	1.56801	0.0115755	0.165049	-0.388097	0.764137	122289	160036	123125	140345	102106	98502.7	156612	123257	124171	49191.4	152924	152658	204319	147049	152667	151470	154222	207192	120953	155853	139200	167432
3.42_423.0813m/z	423.081	3.4227	neg	N-phosphocreatinate(2-)	HMDB0062567	Unclassified	Unclassified	Unclassified	2M-H	C4H11N3O5P+	40.3	13.5	3.2111	1.39875	0.0121118	0.169192	-0.815822	0.568085	32038.6	56397.6	55159.2	49685.5	53003.1	39748.8	38233.7	31992.8	24542.6	26936.5	576.097	507.699	44237.7	50072.1	54900.1	39330	55170.8	44870	77083.6	75806.8	30052.8	92451.9
10.07_572.3920n	590.426	10.0732	pos	IC202A	LMFA08020182	Lipids and lipid-like molecules	Fatty Acyls	Fatty amides	M+NH4, M+Na, M+K, M+H	C27H52N6O7	39.9	9.61	4.01494	5.77066	0.0189684	0.209999	-0.175072	0.885723	4.45971e+06	5.0351e+06	4.10851e+06	4.07702e+06	4.28964e+06	4.61785e+06	4.29392e+06	4.70066e+06	4.68011e+06	5.1533e+06	4.01614e+06	4.65992e+06	5.12871e+06	4.88658e+06	5.27562e+06	5.00466e+06	5.27514e+06	4.50622e+06	4.64762e+06	6.50683e+06	4.79852e+06	4.32111e+06
14.03_113.0482n	225.089	14.027	neg	1-Pyrroline-2-carboxylic acid	HMDB0006875	Organoheterocyclic compounds	Pyrrolines	Unclassified	M+FA-H, 2M-H	C5H7NO2	39.9	13.4	4.3758	2.09312	0.0112607	0.162139	0.209331	1.15615	490023	423840	435782	466806	444607	488081	447133	511101	481619	527008	432562	665536	436455	425801	452686	405584	447618	377793	399751	460512	419508	412692
0.53_123.0793m/z	123.079	0.531983	pos	3-Ethylphenol	70020	Benzenoids	Phenols	1-hydroxy-4-unsubstituted benzenoids	M+H	C8H10O	39.4	15	-9.48758	1.54449	0.00800862	0.133761	-0.263116	0.833286	167146	200586	182968	198724	173314	199612	172625	130088	186019	149837	170012	108260	193083	233309	209823	206834	209411	178737	183644	221940	198441	170643
0.75_203.1502m/z	203.15	0.752683	pos	Asymmetric dimethylarginine	HMDB0001539	Organic acids and derivatives	Carboxylic acids and derivatives	Amino acids, peptides, and analogues	M+H	C8H18N4O2	39.2	0	-0.358855	1.05683	0.0264189	0.233706	0.35968	1.28314	93071.9	72534.5	91821.3	91619.9	116438	106259	117481	66375.1	103897	95629.4	91582.2	49617	109860	66316.4	67933.3	76349.2	70732.4	78323.8	83350.7	52593.4	52558.8	67326.1
0.75_279.1913m/z	279.191	0.752683	pos	hydroxyisovaleroyl carnitine	HMDB0062555	Lipids and lipid-like molecules	Fatty Acyls	Fatty acid esters	M+NH4	C12H23NO5	39.2	0	-0.511775	2.16752	2.98039e-05	0.00815558	1.04562	2.06425	100523	48697	111368	140560	83250.2	129619	101947	94639.7	73100.9	111317	95012.2	64412.7	54785.1	29464.7	45157.2	38663.7	46140.6	83414.3	42784.9	35803.2	75022.3	35734
1.10_633.1267m/z	633.127	1.09818	neg	Petunidin	LMPK12010005	Lipids and lipid-like molecules	Polyketides	Flavonoids	2M-H	C16H13O7+	39.2	0	2.67512	2.61132	0.0170652	0.200477	0.939685	1.91811	258448	134741	189796	279883	359483	199111	147237	246242	142818	476144	290723	253047	40952.5	90349.7	130264	58883.1	125540	148907	271368	29221.9	79484.3	372443
10.03_310.1617m/z	310.162	10.0274	pos	Histidinyl-Histidine	HMDB0028887	Organic acids and derivatives	Carboxylic acids and derivatives	Amino acids, peptides, and analogues	M+NH4	C12H16N6O3	39.2	0	-1.83808	1.84058	0.00335506	0.0863698	0.550623	1.46472	144874	98908.8	139747	140542	180363	185462	150884	81890.8	126521	88488	142343	212494	84818.7	104196	93691.2	105317	95489.9	87007	109830	78366.4	108110	122262
10.18_820.5840m/z	820.584	10.177	pos	PE(22:2(13Z,16Z)/18:1(11Z))	HMDB0009553	Lipids and lipid-like molecules	Glycerophospholipids	Glycerophosphoethanolamines	M+Na	C45H84NO8P	39	0	1.59838	5.92095	0.00518487	0.108582	-0.773757	0.584892	684195	1.16978e+06	794430	739186	535290	530127	396404	691764	456764	1.10149e+06	1.01727e+06	579227	1.94862e+06	627871	1.44262e+06	1.48109e+06	1.3986e+06	919393	1.02285e+06	751155	739889	1.36571e+06
10.69_297.2898m/z	297.29	10.6908	pos	Linoleamide	HMDB0062656	Lipids and lipid-like molecules	Fatty Acyls	Fatty amides	M+NH4	C18H33NO	39	0	-0.75868	2.87411	3.74491e-05	0.00844496	-0.690251	0.619746	137149	221300	142323	120394	136503	148846	141894	151684	111856	117159	109397	191439	221005	257982	223818	181661	220623	224307	291170	184631	147049	260749
12.64_339.1999m/z	339.2	12.6438	neg	NORETHINDRONE ACETATE	44171	Unclassified	Unclassified	Unclassified	M-H	C22H28O3	38.9	14.2	9.82603	2.60115	0.0255971	0.231809	-0.22741	0.854167	642435	752119	777506	693384	534743	549424	505183	562338	604847	686533	688893	821504	827508	751511	757529	650409	757718	699372	816769	945389	640290	674699
9.64_338.2454n	356.279	9.64338	pos	(+/-)14,15-DiHETrE	LMFA03050010	Lipids and lipid-like molecules	Fatty Acyls	Eicosanoids	M+NH4, M+Na	C20H34O4	38.8	0	-1.01372	3.76332	0.00225319	0.0731709	-6.64336	0.0100034	1774.85	177424	1642.84	2027.93	1895.86	562.879	1729.49	3022.51	2823.95	2495.38	186.261	1361.44	63717.7	250336	221077	34992.2	215160	60476.3	154203	567374	89450.6	117458
8.36_445.2461n	446.253	8.3604	pos	Mivacurium Metabolite (Isoquinolinium, 1,2,3,4-tetrahydro-2-(3-hydroxypropyl)-6,7-dimethoxy-2-methyl	1328	Unclassified	Unclassified	Unclassified	M+H, M+NH4	C25H35NO6	38.7	0.0284	-0.667041	2.34608	0.0121504	0.169192	-0.34895	0.785155	355867	453245	386822	281704	321406	440443	425997	326020	384997	302698	397266	291322	573451	336464	445514	473206	459581	387274	361768	591065	550403	353720
0.74_292.1977m/z	292.198	0.737967	pos	Glutaminyllysine	HMDB0028802	Organic acids and derivatives	Carboxylic acids and derivatives	Amino acids, peptides, and analogues	M+NH4	C11H22N4O4	38.6	0	-0.890202	2.4746	2.4143e-06	0.00205968	2.22673	4.68071	85248.8	18212.8	104239	149061	72396.5	101729	73794.3	82213.1	79815.5	77877.3	73113.1	38249.1	37887.6	5218.25	15392.1	11768.7	16557.1	27351	5767.69	3668.7	35102.8	23413.7
10.31_353.3290n	336.326	10.3052	pos	Anandamide (20:l, n-9)	LMFA08040010	Lipids and lipid-like molecules	Fatty Acyls	Fatty amides	M+H-H2O, M+Na	C22H43NO2	38.6	0	-1.13813	1.77584	0.0422016	0.288707	-0.279999	0.823592	222239	269841	179007	290551	196553	197821	191904	272704	181787	221767	193219	297075	274030	368665	283531	245676	281695	219007	314634	213441	204364	293366
10.46_472.3632m/z	472.363	10.4589	pos	27-Norcholestanehexol	LMST04020029	Lipids and lipid-like molecules	Sterol Lipids	Bile acids and derivatives	M+NH4	C26H46O6	38.6	0	-0.231144	1.5573	0.00429468	0.0993394	-0.169715	0.889018	275827	310261	242966	278811	259724	287301	256918	299243	276909	322527	248566	285308	328437	322322	326875	328022	326131	276854	294634	330842	292866	275623
14.28_198.0172m/z	198.017	14.2755	pos	O-Phospho-4-hydroxy-L-threonine	HMDB0006802	Organic acids and derivatives	Carboxylic acids and derivatives	Amino acids, peptides, and analogues	M+H-H2O	C4H10NO7P	38.6	0	4.48242	1.08557	0.000106461	0.0136638	-0.312701	0.805133	61578.2	76482	60572.6	55661.6	56677.8	66696.9	62318.3	59571.2	56546.6	65982.6	53882.1	77871.9	85879.9	78111.1	80153.6	79421.8	79634.4	71472	70541.9	76421.9	79614.6	63568.4
14.42_211.0038m/z	211.004	14.4211	pos	Benzyl sulfate	HMDB0034782	Benzenoids	Benzene and substituted derivatives	Unclassified	M+Na	C7H8O4S	38.6	0	1.16611	2.03608	0.000589776	0.0334122	-0.321188	0.800411	225631	281894	208886	213763	216948	242831	218510	177094	221922	260219	201956	294177	330485	297929	295472	292321	294583	263138	255797	288445	268687	232081
9.23_534.2958m/z	534.296	9.22518	pos	PC(O-14:0/2:0)	LMGP01020019	Lipids and lipid-like molecules	Glycerophospholipids	Glycerophosphocholines	M+K	C24H50NO7P	38.6	0	0.300204	1.67651	5.45505e-05	0.00953187	-0.202502	0.869042	204980	235869	194853	197334	228551	222575	210651	191379	187511	191680	199820	225445	253645	234313	237020	235185	239667	222829	241206	245844	219179	229799
8.73_664.3456m/z	664.346	8.73123	pos	OHOHA-PS	LMGP20040027	Lipids and lipid-like molecules	Glycerophospholipids	Oxidized glycerophospholipids	M+H	C31H54NO12P	38.5	0	-0.0815601	1.17341	0.00672657	0.123224	-0.893548	0.538289	20696.8	38449.2	25866.7	26455.6	41395.5	40018.4	29562.5	14711.3	14040.8	11545.7	1498.38	1873.07	44895.8	30819.1	36116.6	23313.5	36744.8	39718.8	64734.9	42940.4	26220.1	38988.6
11.01_577.4106n	578.418	11.0084	pos	LysoPC(22:1(13Z))	HMDB0010399	Unclassified	Unclassified	Unclassified	M+H, M+Na	C30H60NO7P	38.4	0	-0.203814	1.57103	0.0417693	0.287777	-0.466194	0.723872	118262	163374	134621	148506	180852	130503	112333	90719.6	112778	21001.1	89332.1	161976	151140	240558	145262	156237	152103	191170	227790	75612.4	152473	141398
10.66_207.0174m/z	207.017	10.6609	pos	2-Pyrroloylglycine	HMDB0059778	Organic acids and derivatives	Carboxylic acids and derivatives	Amino acids, peptides, and analogues	M+K	C7H8N2O3	38.3	0	4.27467	3.37883	8.30116e-05	0.0121233	0.344552	1.26976	584691	460475	511482	517827	544893	585288	558465	633653	671775	737972	543069	542483	467090	452665	481956	458271	482333	432746	433852	495353	476406	424075
0.95_201.0375m/z	201.037	0.94975	neg	2-(2-Thienylmethylene)-1,6-dioxaspiro[4.4]non-3-ene	HMDB0034857	Organoheterocyclic compounds	Heteroaromatic compounds	Unclassified	M-H2O-H	C12H12O2S	38.2	5.51	-2.11513	1.53867	0.00770841	0.131678	0.138641	1.10087	411693	373971	385750	425044	437669	441898	378857	370987	430463	375356	446799	424109	357677	397392	365918	389151	361996	334280	424897	387941	363009	357454
10.89_323.3056m/z	323.306	10.8858	pos	Clavepictine B	LMSP01080053	Lipids and lipid-like molecules	Sphingolipids	Sphingoid bases	M+NH4	C20H35NO	38.2	0	-0.246493	1.07973	0.000656489	0.0356941	-0.694528	0.617911	21877.7	35405.9	29444.4	17454.9	24544.7	22866.9	23809.5	23283.4	16338.3	14262.3	13878.5	32894.3	28567.9	37035	36005.1	27964.1	36452.2	39941.3	41554.9	26876.2	26916.6	52745.7
14.29_887.5639m/z	887.564	14.2901	pos	PI(16:0/22:4(7Z,10Z,13Z,16Z))	HMDB0009794	Lipids and lipid-like molecules	Glycerophospholipids	Glycerophosphoinositols	M+H	C47H83O13P	38.2	0	-0.622559	2.67889	0.0373585	0.274057	0.767445	1.70225	322618	189524	395394	329803	363828	395313	384800	341747	258729	158045	268605	329914	949.123	1868.5	156911	3.74188e-07	172602	279059	172675	188372	479356	443448
9.24_296.1461m/z	296.146	9.24122	pos	Dothiepin	2429	Unclassified	Unclassified	Unclassified	M+H	C19H21NS	38.2	0.158	-2.07194	2.23526	0.000123022	0.0148683	0.492718	1.40709	201297	143059	205215	189188	231096	250540	237011	139543	225895	164144	209834	160504	137133	158946	137267	131028	140408	148386	148234	137832	143051	148304
8.84_265.1478m/z	265.148	8.83937	neg	6,7-Dihydro-4-(hydroxymethyl)-2-(p-hydroxyphenethyl)-7-methyl-5H-2-pyrindinium	HMDB0033483	Benzenoids	Phenols	1-hydroxy-2-unsubstituted benzenoids	M-H2O-H	C18H22NO2+	37.9	0	2.21843	7.58199	0.048749	0.309548	-2.63804	0.160647	193836	1.2066e+06	240394	195598	163656	182363	163979	175734	230335	219183	187946	179169	302859	816803	1.37819e+06	310026	1.38642e+06	429077	862909	5.37271e+06	527472	679498
14.28_205.0171m/z	205.017	14.2755	pos	O-methoxycatechol-O-sulphate	HMDB0060013	Organic acids and derivatives	Organic sulfuric acids and derivatives	Arylsulfates	M+H	C7H8O5S	37.8	0.169	2.85082	3.24271	0.000110686	0.0139281	-0.340988	0.789501	468292	593150	460149	456799	439618	508118	466438	442271	457495	518445	415843	517746	728723	644160	621109	623339	619339	533339	517742	606971	556318	480458
10.03_640.2927m/z	640.293	10.0333	neg	S-(9-deoxy-delta9,12-PGD2)-glutathione	HMDB0013058	Organic acids and derivatives	Carboxylic acids and derivatives	Amino acids, peptides, and analogues	M-H	C30H47N3O10S	37.7	0.0468	2.67256	2.24077	0.00348776	0.0872121	-0.242058	0.845538	338407	400227	333629	371072	402001	390371	321371	335496	326872	266360	339009	297892	434216	462480	398295	424262	394665	370114	425079	324403	353150	415606
9.64_585.4105m/z	585.411	9.64338	pos	Campesteryl glucoside	LMST01031126	Lipids and lipid-like molecules	Sterol Lipids	Sterols	M+Na	C34H58O6	37.6	0	-3.58699	2.69224	0.0357604	0.269484	-38.2334	3.09453e-12	3.74188e-07	120919	3.74188e-07	3.74188e-07	3.74188e-07	3.74188e-07	3.74188e-07	3.74188e-07	3.74188e-07	3.74188e-07	3.74188e-07	3.74188e-07	23558.9	112623	145994	12836	142633	25304.4	76095.7	579713	40580.1	49855.5
9.66_541.3846m/z	541.385	9.65837	pos	Ganoderiol C	HMDB0037781	Lipids and lipid-like molecules	Prenol lipids	Triterpenoids	M+Na	C32H54O5	37.6	0	-3.44646	2.50199	0.043106	0.29262	-38.0643	3.47942e-12	3.74188e-07	107543	3.74188e-07	3.74188e-07	3.74188e-07	3.74188e-07	3.74188e-07	3.74188e-07	3.74188e-07	3.74188e-07	3.74188e-07	3.74188e-07	21468.5	91839.2	129230	12662.8	127033	20836.1	58196.9	535247	31096	47822.2
0.81_655.1085m/z	655.108	0.814217	neg	Aflatoxin G	HMDB0030474	Phenylpropanoids and polyketides	Coumarins and derivatives	Furanocoumarins	2M-H	C17H12O7	37.5	0	-1.28743	1.68201	0.0265955	0.233706	1.10242	2.14715	100837	46963.3	66246.7	117455	144413	60835.6	47056.9	94212.9	41173	199631	132549	104799	6360.99	3527.2	42910.9	19876.2	42694	46476.1	106372	4621.28	36661	160134
14.03_213.0890m/z	213.089	14.027	neg	N2-Succinyl-L-ornithine	HMDB0001199	Organic acids and derivatives	Carboxylic acids and derivatives	Amino acids, peptides, and analogues	M-H2O-H	C9H16N2O5	37.4	0	3.85792	1.58095	0.0234356	0.225239	0.155429	1.11375	407049	365475	377671	391180	372302	417549	368203	416183	402157	434460	364277	526512	393630	367612	388230	348518	385572	337417	340431	390346	355825	347173
10.02_636.3495m/z	636.35	10.0163	neg	Allodesmosine	HMDB0040704	Organic acids and derivatives	Carboxylic acids and derivatives	Pentacarboxylic acids and derivatives	M-H2O-H	C30H51N6O10+	37.3	0	1.05112	1.9731	0.00476325	0.104828	-0.241088	0.846107	267187	315785	273600	324596	285423	269780	221465	274710	262142	223215	283087	253857	359002	382705	318740	334868	316772	288715	312960	259016	276103	308965
8.94_997.6243m/z	997.624	8.93805	pos	PIM1(17:0/18:0)	LMGP15010012	Lipids and lipid-like molecules	Glycerophospholipids	Glycerophosphoinositolglycans	M+H-H2O	C50H95O18P	37.3	0	1.9122	1.84136	0.043402	0.293396	-0.437646	0.738338	164603	222938	172718	265535	239034	200032	148268	104354	87831	50602.7	145551	232108	220275	267841	193586	200330	206449	252434	322384	150612	208472	206993
9.00_656.3185m/z	656.318	9.0023	neg	OKOOA-PS	LMGP20040029	Lipids and lipid-like molecules	Glycerophospholipids	Oxidized glycerophospholipids	M-H2O-H	C32H54NO12P	37.3	9.61	-3.0435	1.00794	0.0385191	0.278486	-0.292019	0.816758	83113.6	101760	104171	58577.6	91569.2	120556	66987.7	106453	54223.8	73643.8	78009.1	76944.4	88147.5	92792.1	102318	130008	103552	96789.5	89294.1	123060	85954	105688
9.05_643.2889m/z	643.289	9.05357	neg	PI(22:6(4Z,7Z,10Z,13Z,16Z,19Z)/0:0)	LMGP06050012	Lipids and lipid-like molecules	Glycerophospholipids	Glycerophosphoinositols	M-H	C31H49O12P	37.3	0	0.0599725	1.13857	0.00774604	0.13201	-0.483288	0.715345	44478.5	62177.6	45189.4	37982.2	48501.5	54903.1	47030.7	43979.9	43407.3	27877.5	56696.6	39216.5	49571.9	70221.6	57426.6	73436.7	59729.2	50844	98927.9	46703.9	43853	71061.3
3.43_364.0966m/z	364.097	3.42683	pos	Cefadroxil	HMDB0015271	Organoheterocyclic compounds	Lactams	Beta lactams	M+H	C16H17N3O5S	37.2	0	1.1014	1.79485	0.00202773	0.0690332	-0.907319	0.533175	40817.9	76556.3	62098.7	61833.9	58682.7	62663.4	58430.5	43483.7	34745.3	26240.8	3.74188e-07	3.74188e-07	85529.9	61924.8	79127.9	56428.2	81684.9	70134.1	88147.5	94207.6	42348.1	106030
8.92_979.5769m/z	979.577	8.92212	pos	Erinacine D	HMDB0031896	Lipids and lipid-like molecules	Prenol lipids	Diterpenoids	2M+Na	C27H42O7	37.2	0	1.60494	1.33899	0.00479805	0.105433	-0.917115	0.529567	28099.6	53061.5	25464.2	39826.1	40454.3	45470.7	39304.2	9176.56	9390.08	6804.1	27165.9	37940	52113.4	56336.8	46622.6	46051.1	49215.3	66072.4	101971	34126.5	41419.4	36686.7
1.10_801.1549m/z	801.155	1.09818	neg	5-Hexenyl glucosinolate	HMDB0038416	Organic oxygen compounds	Organooxygen compounds	Carbohydrates and carbohydrate conjugates	2M-H	C13H23NO9S2	36.8	0	-0.778871	1.03074	0.0460545	0.301184	1.05128	2.07236	40145.9	19372	26786.1	26049.8	73053.5	19849.7	35782.2	28428.6	10186.5	77786.7	52969.2	50566.2	3.74188e-07	9604.72	16764.6	7784.45	17610.9	25660.6	45399.1	3.74188e-07	6989.45	63906.5
8.71_688.3451m/z	688.345	8.71348	pos	Jubanine C	HMDB0037300	Organic acids and derivatives	Carboxylic acids and derivatives	Amino acids, peptides, and analogues	M+Na	C39H47N5O5	36.7	0	-2.6963	1.06132	0.0132251	0.176627	-0.825716	0.564202	20142.5	35700.9	30308.8	23540.2	36298.6	37209.7	35590.4	16033.4	11377.6	10087.5	462.077	516.9	40480.9	29077.7	33892.8	19837.9	34236.5	35758.6	58738.8	44021.5	26400.4	34563.8
6.50_603.5345m/z	603.535	6.50005	pos	DG(18:1(9Z)/18:1(9Z)/0:0)	HMDB0007218	Lipids and lipid-like molecules	Glycerolipids	Diradylglycerols	M+H-H2O	C39H72O5	35.9	0	-0.226466	1.16298	1.01939e-06	0.00113725	2.39617	5.26404	16216.3	3080.57	14674.2	17930.4	17069.5	17376.5	12457.9	14219.9	19733.6	19780.6	9650.04	19269.9	104.116	0.341139	2556.3	58.0113	2811.93	3.74188e-07	22.7326	5239.46	14878	5134.8
9.24_523.2988m/z	523.299	9.24122	pos	(Z,Z)-2,9,16-Heptadecatriene-4,6-diyn-8-ol	HMDB0032674	Lipids and lipid-like molecules	Fatty Acyls	Fatty alcohols	2M+K	C17H22O	35.9	0.0151	3.07467	2.34938	0.00531713	0.110147	0.399288	1.31886	336424	255088	362906	300571	374380	429406	368613	233609	352011	191986	366038	384721	225785	277521	238815	219707	246745	277602	310008	200673	255616	298404
1.11_405.0287m/z	405.029	1.1127	neg	Quercetin 7,3',4'-trimethyl ether 3-sulfate	LMPK12112657	Lipids and lipid-like molecules	Polyketides	Flavonoids	M-H2O-H	C18H16O10S	35.7	0	0.375483	1.17274	0.00336475	0.0863698	-1.39954	0.379051	11989.3	31629.7	9265.29	27777.4	2934.35	8201.88	17584.9	24954.2	480.623	2363.68	8157.51	18172.8	32319.5	16172.4	32882.9	36474.5	31362.8	71408.3	19562.9	17445.9	26964.6	31703.4
14.28_909.5498m/z	909.55	14.2779	neg	PI(22:6(4Z,7Z,10Z,13Z,16Z,19Z)/18:0)	HMDB0009920	Lipids and lipid-like molecules	Glycerophospholipids	Glycerophosphoinositols	M-H	C49H83O13P	35.7	0	-0.0790034	1.46145	0.0331891	0.258925	0.81404	1.75813	83884.2	47712.2	88236	83663.3	88942.6	85182.8	126196	70889.5	3.74188e-07	84142.1	102073	109517	17641.2	13818.3	44450.2	2471.07	48895.3	95196.3	7198.58	96290.9	85176.8	65983.5
3.94_786.2374n	831.238	3.93932	neg	Hydroxypropionic porphyrin III	HMDB0000728	Organoheterocyclic compounds	Tetrapyrroles and derivatives	Porphyrins	M-H, M+FA-H	C39H38N4O14	35.7	0	-1.33783	1.02823	0.00519923	0.108582	0.779107	1.71607	34716.4	20230.2	42936.6	11208.7	35597.9	28168.2	47527.9	36119.2	36904.3	14432.5	52222.7	42045.5	15577	11063.5	19052	17869.5	19182.1	23385.2	31212.1	22001.6	19012.7	23945.9
10.92_794.5669m/z	794.567	10.9161	pos	PE(22:2(13Z,16Z)/18:3(9Z,12Z,15Z))	HMDB0009557	Lipids and lipid-like molecules	Glycerophospholipids	Glycerophosphoethanolamines	M+H	C45H80NO8P	35.6	0	-3.24381	3.535	0.0217479	0.22103	-0.477701	0.718121	517894	721179	452718	770268	305184	364922	395224	386954	379193	604678	627865	891930	912839	973768	716092	767192	737544	594809	870458	480807	544310	613968
9.84_748.5270m/z	748.527	9.83927	pos	PC(15:0/20:5(5Z,8Z,11Z,14Z,17Z))	HMDB0007951	Lipids and lipid-like molecules	Glycerophospholipids	Glycerophosphocholines	M+H-H2O	C43H76NO8P	35.3	0	-0.750537	1.33959	0.00312815	0.0838151	-1.11741	0.46092	22645.5	49131.1	28780.3	21743	995.555	24284.5	22709.5	17047.8	21075.9	47003.1	25172.6	17642.7	99454.7	57065.5	46496.7	66219.2	50826.2	41260.5	24100.8	31251.6	43624.8	31010.5
6.64_886.5561n	909.545	6.64115	pos	PI(18:1(9Z)/20:3(8Z,11Z,14Z))	HMDB0009843	Lipids and lipid-like molecules	Glycerophospholipids	Glycerophosphoinositols	M+Na, M+K	C47H83O13P	35.1	0	-1.14025	1.66993	0.000980716	0.0454419	1.45458	2.74077	59558.8	21730.7	56824.8	63038.6	44102.5	65454.5	67178.7	40594.9	88851.7	79656.7	19362	70523.5	1537.49	623.256	18084	1332.05	19877.3	367.174	43758.1	34817.2	28448.9	68461.5
5.67_683.4763m/z	683.476	5.67293	pos	5-Hydroxymethyl tolterodine	HMDB0013973	Benzenoids	Benzene and substituted derivatives	Diphenylmethanes	2M+H	C22H31NO2	34.9	0	-2.79944	1.58116	8.39941e-06	0.00392763	2.67076	6.36762	29811.8	4681.77	21013	18596.3	27410.8	25201.2	24181.5	20441.8	39115.9	21486.5	42714.5	57956.2	586.645	1724.42	4458.33	4229.3	4686.43	6341.13	6715.09	6274.47	4637.06	7164.87
7.31_886.5560n	909.545	7.3079	pos	PI(20:2(11Z,14Z)/18:2(9Z,12Z))	HMDB0009877	Lipids and lipid-like molecules	Glycerophospholipids	Glycerophosphoinositols	M+Na, M+K	C47H83O13P	34.8	0	-1.31512	1.18359	0.0022754	0.0731709	1.45003	2.73213	32653.9	11951.8	35163.5	37648.4	21504	36616	37419.4	20649	59003.7	31587.7	11418.1	35529.1	236.836	0.465453	9894.38	3.74188e-07	10883.3	3.74188e-07	24785.6	18055.9	15867.8	39794
5.69_759.6401m/z	759.64	5.69057	pos	3-nonadecylphenol	LMPK15010006	Lipids and lipid-like molecules	Polyketides	Phenolic lipids	2M+K	C25H44O	34.7	0	-2.07405	1.76118	3.94083e-07	0.000672539	3.20525	9.22312	32901.6	3567.3	26048.5	20287.9	33391.4	32248.5	26272.5	19701.4	43565.3	29017	39560.6	58923.1	880.828	3009.3	3330.68	1934.01	3538.5	3671.93	3976.02	4319.04	5029.11	5983.59
6.68_880.5898m/z	880.59	6.67642	pos	PI(18:0/18:2(9Z,12Z))	HMDB0009809	Lipids and lipid-like molecules	Glycerophospholipids	Glycerophosphoinositols	M+NH4	C45H83O13P	34.7	0	-1.30817	1.09378	6.88209e-05	0.010849	2.45995	5.50198	15558.8	2827.86	11864.2	16788.3	15894.7	14719.7	10440.2	10742	21323.9	17658.8	6480.68	29676.1	59.0814	170.627	2371.01	129.287	2608.09	4.612	654.697	1782.04	13523.5	6975.67
7.85_909.5452m/z	909.545	7.85042	pos	PI(20:3(8Z,11Z,14Z)/18:1(9Z))	LMGP06010569	Lipids and lipid-like molecules	Glycerophospholipids	Glycerophosphoinositols	M+Na	C47H83O13P	34.7	0	-1.30448	1.19058	0.0010677	0.0472218	1.56577	2.96035	29704.4	10034.1	29757.1	36712.1	24988.5	35155.4	31531.8	17186.8	48626.1	30178.6	8320.52	34586.9	3.74188e-07	3.74188e-07	8303.84	3.74188e-07	9121.89	3.74188e-07	19810.1	12092.8	15186	35826.2
10.92_820.5244m/z	820.524	10.9161	pos	PC(16:1(9Z)/20:3(5Z,8Z,11Z))	LMGP01012138	Lipids and lipid-like molecules	Glycerophospholipids	Glycerophosphocholines	M+K	C44H80NO8P	34.4	0	-1.10783	1.80226	0.032122	0.25485	-0.959923	0.514084	59164.7	115087	54670.9	3.74188e-07	97713.9	91258.6	77941.4	45942.3	57938.1	91121.5	75060.1	3.74188e-07	198726	3.74188e-07	124744	112922	115701	62935.7	238836	121105	66103.4	109802
0.67_248.9603m/z	248.96	0.66825	neg	5-(4-Chloro-3-hydroxy-1-butynyl)-2,2'-bithiophene	HMDB0033269	Organoheterocyclic compounds	Bi- and oligothiophenes	Unclassified	M-H2O-H	C12H9ClOS2	34	8.23	-0.874348	1.86494	0.0233734	0.225239	-0.20449	0.867845	383297	441665	389105	363109	325791	455859	371033	434050	407333	490647	293579	302463	477411	427990	490906	439747	490412	398949	408525	452281	435500	394928
3.48_223.0397n	241.074	3.47558	pos	Methyl 4-chloro-1H-indole-3-acetate	HMDB0032937	Organoheterocyclic compounds	Indoles and derivatives	Indolyl carboxylic acids and derivatives	M+H, M+NH4	C11H10ClNO2	34	0.0989	-1.30451	1.01851	0.0224655	0.223162	-0.398937	0.758417	60851.8	80235.3	47184.2	48713.5	53414	61162.8	51652.6	41852.8	49358.2	65197.3	67824.7	122158	92331.2	83652.4	80297.7	80691	81242.8	69711.3	83187.9	91208.4	66563.9	73466.6
8.97_819.4655m/z	819.465	8.96955	pos	SQDG(16:0/14:0)	LMGL05010005	Lipids and lipid-like molecules	Glycerolipids	Glycosyldiradylglycerols	M+K	C40H76O12S	33.3	0	-4.42164	1.22889	0.0204738	0.215793	0.419577	1.33754	92840.9	69411.9	96367.2	83288.9	81929.4	86549	121118	87146.4	126086	49494.1	124920	71510.2	91407.3	61953.8	63658	90382.7	67675.4	81268.4	44384.4	62708.8	76002.7	54677.5
8.95_288.1344m/z	288.134	8.95353	pos	10,11-Dihydroxycarbamazepine	HMDB0060568	Organoheterocyclic compounds	Benzazepines	Dibenzazepines	M+NH4	C15H14N2O3	33.1	0	0.398735	1.22561	0.00234894	0.0738816	0.374699	1.29657	95215.4	73436.4	105652	98310.8	119304	108822	99402.2	99540.9	102984	72358.4	80046	65733.4	54709.3	62239.2	69773.2	79082.3	72279.9	75416	88019.2	74628.1	77935	80282.1
9.66_491.3663m/z	491.366	9.65837	pos	2'-Apo-beta-carotenal	HMDB0035150	Lipids and lipid-like molecules	Prenol lipids	Sesquaterpenoids	M+H-H2O	C37H48O	33.1	0	-1.78424	1.08232	0.0371947	0.273758	-8.77398	0.00228438	44.7446	19587.2	3.74188e-07	3.74188e-07	3.74188e-07	3.74188e-07	3.74188e-07	3.74188e-07	3.74188e-07	3.74188e-07	447.446	3.74188e-07	2646.15	16482	24436.8	2533.43	24208.3	2592.26	12872.7	94071	6105.87	9923.21
10.92_828.5501m/z	828.55	10.9161	pos	PC(20:5(5Z,8Z,11Z,14Z,17Z)/20:4(5Z,8Z,11Z,14Z))	HMDB0008509	Lipids and lipid-like molecules	Glycerophospholipids	Glycerophosphocholines	M+H	C48H78NO8P	33	0	-4.47799	2.18553	0.0209974	0.218251	-0.92522	0.5266	87219.7	165628	60944.9	23322.2	164364	120719	81967.7	71107.7	81787.7	108350	131117	28517.5	236673	32094.6	172939	168582	164829	126185	363871	131571	107486	152049
6.04_930.0680m/z	930.068	6.04342	pos	3,7,11,15,18-pentamethyloctacosane	LMFA11000011	Lipids and lipid-like molecules	Fatty Acyls	Hydrocarbons	2M+H	C33H68	33	0	-3.72025	1.31468	0.00134798	0.0547318	-1.23606	0.42453	17964.2	42315.6	19361.4	15760.3	11812.2	9538.43	9019.46	21332.8	25966.5	4159.75	35900.4	26791.1	17529.3	51352.7	37772.7	77956.1	41123.1	47858.5	57865.4	19617.1	37455.7	34625.3
14.42_196.0168m/z	196.017	14.4211	pos	m-Chlorohippuric acid	HMDB0001309	Benzenoids	Benzene and substituted derivatives	Benzoic acids and derivatives	M+H-H2O	C9H8ClNO3	32.8	0	3.60459	7.1394	0.000161323	0.0167119	-0.374391	0.771431	2.15521e+06	2.79378e+06	1.98878e+06	2.05161e+06	2.01882e+06	2.27181e+06	2.10256e+06	1.84075e+06	2.06978e+06	2.40123e+06	1.8565e+06	2.95021e+06	3.25621e+06	3.00019e+06	2.9262e+06	2.92719e+06	2.9166e+06	2.59281e+06	2.51882e+06	2.82258e+06	2.65879e+06	2.3184e+06
14.42_194.0215m/z	194.021	14.4211	pos	2-chloromuconic acid	LMFA01030967	Lipids and lipid-like molecules	Fatty Acyls	Fatty Acids and Conjugates	M+NH4	C6H5ClO4	32.5	0	-0.0659119	2.07421	3.91926e-05	0.00844496	-0.390385	0.762926	161517	211707	153537	153559	155323	174769	161580	138047	155843	176355	138033	208124	247431	228968	222097	218686	221784	195503	191406	214658	200227	176314
14.32_213.9828m/z	213.983	14.3191	pos	Chloroxine	HMDB0015373	Organoheterocyclic compounds	Quinolines and derivatives	Haloquinolines	M+H	C9H5Cl2NO	32.4	11.7	3.16938	2.74424	6.65252e-05	0.0106485	-0.308998	0.807202	377165	467249	359016	365322	354777	405222	372345	338971	372961	420134	338094	444807	548022	492931	487452	484606	486398	437467	415245	463999	454353	402021
3.43_361.0925n	362.1	3.42683	pos	Methoxyzotepine	3105	Unclassified	Unclassified	Unclassified	M+H-H2O, M+H	C19H20ClNO2S	32	0.659	6.0655	3.56071	0.00129025	0.0533121	-0.912127	0.531401	157418	296233	243806	228931	243003	218547	217998	161845	139548	117073	1229.6	2203.15	310523	253447	306235	243184	314766	249035	331947	378489	172984	401718
9.97_815.6920m/z	815.692	9.9656	pos	TG(15:0/o-18:0/14:1(9Z))	HMDB0043807	Lipids and lipid-like molecules	Glycerolipids	Triradylcglycerols	M+K	C50H96O5	30.7	0	3.97113	1.34348	0.000460915	0.0294478	1.62922	3.09346	34040.5	11004	27164.1	27812.9	18146.7	27955.1	47261.7	45154.9	44079.5	23259.4	27338.6	52231.7	3.74188e-07	3.74188e-07	9094.23	3.74188e-07	10003.7	3.74188e-07	28023.2	10498.2	18746.7	33674.1
8.95_547.2993m/z	547.299	8.95353	pos	PG(19:1(9Z)/0:0)	LMGP04050022	Lipids and lipid-like molecules	Glycerophospholipids	Glycerophosphoglycerols	M+Na	C25H49O9P	30.3	0	-2.54551	1.77369	0.0194795	0.212415	0.273431	1.20868	339737	281082	376086	368616	428788	343986	339886	325990	426289	231728	275457	280547	243214	251766	263385	297150	272875	263778	297073	262542	302525	356508

## Sheet: PBA1_Control
ID	m/z	Retention time (min)	Ion mode	Metabolites	Compound ID	Super Class	Class	Sub Class	Adducts	Formula	Score	Fragmentation Score	Mass Error (ppm)	VIP	P-value	adj.P-value	log2(FC)	FC	average(PBA1)	average(Control)	PBA1-1	PBA1-2	PBA1-3	PBA1-4	PBA1-5	PBA1-6	PBA1-7	PBA1-8	PBA1-9	Control-1	Control-2	Control-3	Control-4	Control-5	Control-6	Control-7	Control-8	Control-9	Control-10
8.82_564.3307m/z	564.331	8.82307	neg	LysoPC(18:2(9Z,12Z))	HMDB0010386	Lipids and lipid-like molecules	Glycerophospholipids	Glycerophosphocholines	M+FA-H	C26H50NO7P	59	96.1	0.0415904	8.5088	0.000149539	0.00237283	-0.538223	0.688619	3.01608e+06	4.3799e+06	2.45046e+06	4.06035e+06	3.468e+06	2.55385e+06	2.38156e+06	3.5818e+06	3.59608e+06	2.81401e+06	2.2386e+06	3.83492e+06	4.47122e+06	4.01662e+06	4.69218e+06	4.2043e+06	4.65863e+06	5.30736e+06	3.38365e+06	4.28107e+06	4.94903e+06
9.43_478.2940m/z	478.294	9.42667	neg	PE(18:1(9Z)/0:0)	40778	Unclassified	Unclassified	Unclassified	M-H	C23H46NO7P	58.9	98.5	0.152014	3.04711	0.00338349	0.0245231	-0.492398	0.710843	535491	753319	429249	642670	628807	265487	442059	703939	691556	501051	514604	621214	707816	695535	641135	705921	1.03882e+06	946426	678431	737171	760723
8.95_564.3307m/z	564.331	8.95372	neg	2-linoleoyl-sn-glycero-3-phosphocholine	HMDB0062711	Lipids and lipid-like molecules	Glycerophospholipids	Glycerophosphocholines	M+FA-H	C26H50NO7P	58.8	94.5	-0.0726939	18.8491	9.12508e-06	0.000312425	-0.372817	0.772273	2.02984e+07	2.62839e+07	1.79876e+07	2.53738e+07	2.14204e+07	1.85935e+07	1.80564e+07	2.28772e+07	2.20525e+07	1.9202e+07	1.71218e+07	2.57295e+07	2.68315e+07	2.50136e+07	2.77547e+07	2.57313e+07	2.65022e+07	2.73337e+07	2.43492e+07	2.55963e+07	2.79973e+07
10.03_568.3620m/z	568.362	10.0333	neg	LysoPC(18:0)	HMDB0010384	Lipids and lipid-like molecules	Glycerophospholipids	Glycerophosphocholines	M+FA-H	C26H54NO7P	58.7	95	0.0823124	12.7435	0.0164247	0.0743237	-0.330679	0.795162	1.63496e+07	2.05614e+07	1.79828e+07	2.24484e+07	1.69069e+07	1.42541e+07	9.28843e+06	1.83079e+07	1.88432e+07	1.57372e+07	1.33778e+07	2.06182e+07	2.45464e+07	1.97677e+07	2.25099e+07	1.99078e+07	2.00877e+07	2.44385e+07	1.34397e+07	1.95011e+07	2.0797e+07
8.95_612.3308m/z	612.331	8.95372	neg	LysoPC(22:6(4Z,7Z,10Z,13Z,16Z,19Z))	HMDB0010404	Lipids and lipid-like molecules	Glycerophospholipids	Glycerophosphocholines	M+FA-H	C30H50NO7P	58.7	94.5	0.105963	10.1985	2.68684e-05	0.000666107	-0.487542	0.713239	4.56421e+06	6.39927e+06	5.12608e+06	5.95576e+06	4.96481e+06	3.79562e+06	3.74995e+06	5.18665e+06	4.35034e+06	4.31245e+06	3.63619e+06	5.8426e+06	7.17419e+06	6.18503e+06	7.68166e+06	6.28303e+06	5.95128e+06	6.66657e+06	5.76978e+06	6.31853e+06	6.11998e+06
9.46_566.3464m/z	566.346	9.46047	neg	LysoPC(18:1(9Z))	HMDB0002815	Lipids and lipid-like molecules	Glycerophospholipids	Glycerophosphocholines	M+FA-H	C26H52NO7P	58.5	94	0.157333	15.2678	0.0088807	0.0481631	-0.456245	0.728881	1.44215e+07	1.97858e+07	1.06407e+07	1.83095e+07	1.62222e+07	8.74835e+06	1.14692e+07	2.49203e+07	1.52294e+07	1.33233e+07	1.09304e+07	1.65178e+07	2.06238e+07	1.79498e+07	1.93679e+07	1.87833e+07	2.14452e+07	2.35906e+07	1.78245e+07	1.71155e+07	2.46393e+07
8.67_538.3152m/z	538.315	8.66502	neg	LysoPC(16:1(9Z)/0:0)	HMDB0010383	Lipids and lipid-like molecules	Glycerophospholipids	Glycerophosphocholines	M+FA-H	C24H48NO7P	58.4	93.3	0.345083	5.54894	0.0136731	0.0655107	-0.562965	0.67691	1.60564e+06	2.37201e+06	854258	1.85518e+06	2.268e+06	683311	1.56874e+06	3.07104e+06	1.55665e+06	1.47277e+06	1.12079e+06	1.76486e+06	2.21014e+06	2.09413e+06	1.89257e+06	2.23921e+06	2.61422e+06	2.91003e+06	2.69042e+06	2.10069e+06	3.20383e+06
9.16_614.3467m/z	614.347	9.15683	neg	PC(22:5(7Z,10Z,13Z,16Z,19Z)/0:0)	LMGP01050143	Lipids and lipid-like molecules	Glycerophospholipids	Glycerophosphocholines	M+FA-H	C30H52NO7P	58.4	93.6	0.572955	2.8395	0.00154256	0.0137082	-0.739969	0.598752	269641	450339	179625	365387	484999	201224	255402	269219	279300	246375	145240	373697	428480	406046	548429	430090	358499	654207	295896	466285	541755
9.16_569.3478n	570.355	9.1572	pos	LysoPC(22:5(7Z,10Z,13Z,16Z,19Z))	HMDB0010403	Lipids and lipid-like molecules	Glycerophospholipids	Glycerophosphocholines	M+H, M+K, M+Na	C30H52NO7P	58.3	95.4	-0.561036	3.8434	0.0033018	0.0240633	-0.738316	0.599439	542050	904263	315296	641475	1.17063e+06	398726	466504	558180	495704	496498	335439	777943	787576	809067	1.15487e+06	861279	774772	1.26796e+06	594710	948378	1.06607e+06
9.27_590.3466m/z	590.347	9.27488	neg	LysoPC(20:3(5Z,8Z,11Z))	HMDB0010393	Lipids and lipid-like molecules	Glycerophospholipids	Glycerophosphocholines	M+FA-H	C28H52NO7P	58.3	93.5	0.519829	7.40952	0.000628172	0.00705137	-0.620244	0.650561	1.96746e+06	3.02425e+06	981656	2.6524e+06	2.30291e+06	1.46025e+06	1.85201e+06	3.04826e+06	1.93695e+06	1.80142e+06	1.67125e+06	2.46302e+06	2.92568e+06	2.79313e+06	3.07499e+06	2.94655e+06	3.25919e+06	3.321e+06	2.75503e+06	2.57044e+06	4.13343e+06
8.37_512.2994m/z	512.299	8.36675	neg	LysoPC(14:0/0:0)	HMDB0010379	Lipids and lipid-like molecules	Glycerophospholipids	Glycerophosphocholines	M+FA-H	C22H46NO7P	58.2	91.8	0.0639103	2.15093	0.010092	0.0529154	-0.668279	0.629257	185074	294116	104914	170480	263741	90221.2	163282	384987	156238	172092	159714	177244	304208	257490	267631	276578	247479	295194	381618	283512	450203
8.99_588.3308m/z	588.331	8.98562	neg	LysoPC(20:4(5Z,8Z,11Z,14Z))	HMDB0010395	Unclassified	Unclassified	Unclassified	M+FA-H	C28H50NO7P	58.2	91.7	0.166618	14.6025	2.00071e-05	0.00054135	-0.458949	0.727516	9.86034e+06	1.35534e+07	1.10575e+07	1.27473e+07	9.42192e+06	8.38869e+06	8.91471e+06	1.08207e+07	9.80069e+06	9.24647e+06	8.34514e+06	1.33347e+07	1.45247e+07	1.29391e+07	1.53654e+07	1.32155e+07	1.34589e+07	1.50588e+07	1.0701e+07	1.39591e+07	1.29773e+07
9.09_540.3308m/z	540.331	9.08717	neg	LysoPC(16:0)	HMDB0010382	Lipids and lipid-like molecules	Glycerophospholipids	Glycerophosphocholines	M+FA-H	C24H50NO7P	58.2	92.1	0.253009	10.3535	0.000577963	0.00665254	-0.576703	0.670494	4.39416e+06	6.55361e+06	5.43244e+06	6.56618e+06	4.74568e+06	3.02571e+06	2.67891e+06	4.64404e+06	5.14528e+06	4.12517e+06	3.18402e+06	6.05484e+06	7.57727e+06	6.0411e+06	7.22271e+06	6.23952e+06	7.26789e+06	7.63155e+06	4.48429e+06	6.24485e+06	6.77213e+06
9.66_592.3623m/z	592.362	9.66318	neg	LysoPC(20:2(11Z,14Z))	HMDB0010392	Lipids and lipid-like molecules	Glycerophospholipids	Glycerophosphocholines	M+FA-H	C28H54NO7P	58.2	93.2	0.573061	3.17848	0.0372511	0.130143	-0.482915	0.71553	694129	970091	372685	841958	821524	337945	470426	1.37012e+06	852573	635247	544691	834402	932069	867639	889958	913809	1.06454e+06	1.21688e+06	791333	777587	1.41269e+06
8.55_541.3167n	542.324	8.55383	pos	LysoPC(20:5(5Z,8Z,11Z,14Z,17Z))	HMDB0010397	Lipids and lipid-like molecules	Glycerophospholipids	Glycerophosphocholines	M+H, M+K, M+Na	C28H48NO7P	58.1	92.8	-0.244107	2.40087	0.0220378	0.090851	-0.529081	0.692996	359973	519444	205837	326593	637812	272783	344690	536820	373140	334586	207492	369175	444627	469262	468585	500365	434698	608784	617631	454292	827019
9.24_540.3308m/z	540.331	9.24193	neg	LysoPC(0:0/16:0)	HMDB0240262	Lipids and lipid-like molecules	Glycerophospholipids	Glycerophosphocholines	M+FA-H	C24H50NO7P	58.1	92	0.183464	20.6022	0.000354474	0.00458602	-0.359853	0.779244	2.85903e+07	3.66897e+07	3.4107e+07	3.74095e+07	2.72266e+07	2.39558e+07	2.22571e+07	3.09395e+07	2.98781e+07	2.73761e+07	2.41626e+07	3.72532e+07	4.0027e+07	3.53974e+07	4.00938e+07	3.58276e+07	3.79924e+07	3.77334e+07	3.06422e+07	3.68224e+07	3.51079e+07
9.26_546.3551m/z	546.355	9.25747	pos	LysoPC(20:3(8Z,11Z,14Z))	HMDB0010394	Lipids and lipid-like molecules	Glycerophospholipids	Glycerophosphocholines	M+H	C28H52NO7P	58.1	92.8	-0.596072	11.5842	0.00155734	0.0138141	-0.593821	0.662586	5.57206e+06	8.40957e+06	2.79635e+06	7.16852e+06	8.11762e+06	3.91432e+06	4.71441e+06	8.31143e+06	5.64683e+06	5.09016e+06	4.3889e+06	6.76945e+06	8.31827e+06	7.60956e+06	9.01164e+06	8.07718e+06	9.00473e+06	9.65663e+06	7.14073e+06	7.28882e+06	1.12187e+07
9.55_571.3636n	572.371	9.54948	pos	LysoPC(22:4(7Z,10Z,13Z,16Z))	HMDB0010401	Lipids and lipid-like molecules	Glycerophospholipids	Glycerophosphocholines	M+H, M+K, M+Na	C30H54NO7P	58.1	94.4	-0.304841	3.14651	0.000502364	0.00599653	-0.68564	0.62173	343320	552201	283802	459580	568786	272213	260219	349967	332526	315790	246998	484024	539942	495705	690437	522369	537144	731235	354219	584000	582937
9.65_554.3464m/z	554.346	9.64692	neg	LysoPC(17:0)	HMDB0012108	Lipids and lipid-like molecules	Glycerophospholipids	Glycerophosphocholines	M+FA-H	C25H52NO7P	58.1	91.3	0.156172	5.98675	0.000814639	0.00846855	-0.520771	0.696999	1.73197e+06	2.4849e+06	1.70237e+06	2.26248e+06	1.90238e+06	1.49013e+06	884317	1.51624e+06	2.5042e+06	1.65726e+06	1.66837e+06	2.14482e+06	2.96912e+06	2.29086e+06	2.7951e+06	2.35379e+06	2.51805e+06	2.80359e+06	1.89964e+06	2.3407e+06	2.73333e+06
8.99_543.3320n	566.321	8.98595	pos	PC(20:4(8Z,11Z,14Z,17Z)/0:0)	LMGP01050140	Lipids and lipid-like molecules	Glycerophospholipids	Glycerophosphocholines	M+Na, M+K	C28H50NO7P	57.9	95.4	-0.857606	2.12408	7.66226e-05	0.00145453	-0.27054	0.829009	398717	480956	473509	418440	381484	354010	423270	407097	404506	382875	343261	483769	502470	478738	525570	477601	445712	490310	420070	504116	481203
8.36_467.3010n	468.308	8.3604	pos	PC(14:0/0:0)	LMGP01050012	Lipids and lipid-like molecules	Glycerophospholipids	Glycerophosphocholines	M+H, M+Na	C22H46NO7P	57.4	89.4	-0.507141	2.35726	0.0270229	0.104566	-0.573046	0.672196	312009	464164	176276	271880	524915	153915	246079	617381	254728	288834	274075	281783	459624	406254	440921	436776	390099	460393	631494	439590	694706
8.92_477.2856n	476.278	8.9224	neg	LysoPE(18:2(9Z,12Z)/0:0)	HMDB0011507	Lipids and lipid-like molecules	Glycerophospholipids	Glycerophosphoethanolamines	M-H, 2M-H	C23H44NO7P	57.3	88.7	0.0306411	5.81749	7.76902e-05	0.00146069	-0.80742	0.571403	878004	1.53658e+06	723722	1.11431e+06	1.06562e+06	532883	637155	843437	1.4688e+06	828658	687454	1.33832e+06	1.60657e+06	1.40713e+06	1.39105e+06	1.46235e+06	1.76515e+06	2.16734e+06	1.28674e+06	1.56887e+06	1.37225e+06
8.59_562.3152m/z	562.315	8.59457	neg	LysoPC(18:3(6Z,9Z,12Z))	HMDB0010387	Lipids and lipid-like molecules	Glycerophospholipids	Glycerophosphocholines	M+FA-H	C26H48NO7P	57.1	88.5	0.219865	3.17632	9.58745e-05	0.00169449	-0.647948	0.638188	328825	515249	201593	426495	415442	224615	266414	474264	421876	303573	225158	493509	511937	462989	592397	492852	503529	548873	438170	548858	559375
9.68_552.3674m/z	552.367	9.6792	neg	LysoPC(P-18:0)	HMDB0013122	Lipids and lipid-like molecules	Glycerophospholipids	Glycerophosphocholines	M+FA-H	C26H54NO6P	57.1	92.4	0.663508	1.48075	0.0180579	0.0794099	-0.527347	0.69383	127835	184245	162020	213843	121803	92314	76502.4	110041	158062	120162	95765.7	144989	174518	172355	156351	172225	225810	260150	113212	157084	265759
7.10_318.3001m/z	318.3	7.09627	pos	17-hydroxy stearic acid	LMFA02000135	Lipids and lipid-like molecules	Fatty Acyls	Octadecanoids	M+NH4	C18H36O3	57	88.4	-0.448351	1.31717	0.000231602	0.00332566	-0.457725	0.728134	88269	121226	125566	102651	78914.6	83887.6	58749.2	86270.5	99935.9	89139	69307.2	128377	131765	122583	121532	119146	129250	109764	97938.5	122376	129533
8.82_482.3238m/z	482.324	8.81952	pos	LysoPC(15:0)	HMDB0010381	Lipids and lipid-like molecules	Glycerophospholipids	Glycerophosphocholines	M+H	C23H48NO7P	56.9	87.2	-0.599651	3.52783	0.00146914	0.0132211	-0.525803	0.694572	644766	928293	567531	897432	924301	291738	458060	608750	916398	599945	538743	873896	997274	825405	968901	872355	1.0772e+06	1.00151e+06	891747	894308	880324
8.94_502.2923m/z	502.292	8.93805	pos	LysoPE(0:0/20:4(8Z,11Z,14Z,17Z))	HMDB0011488	Lipids and lipid-like molecules	Glycerophospholipids	Glycerophosphoethanolamines	M+H	C25H44NO7P	56.8	87.5	-1.11484	8.28409	0.000933381	0.00938102	-0.653238	0.635852	2.72666e+06	4.2882e+06	2.6529e+06	3.72369e+06	4.00215e+06	1.44004e+06	2.15578e+06	2.14252e+06	3.79997e+06	2.55746e+06	2.06545e+06	4.21085e+06	4.48411e+06	4.05655e+06	4.46463e+06	4.13479e+06	4.91746e+06	6.05176e+06	3.28853e+06	3.96629e+06	3.30707e+06
4.66_417.1193m/z	417.119	4.65765	neg	Equol 4'-O-glucuronide	HMDB0041731	Phenylpropanoids and polyketides	Isoflavonoids	Isoflavonoid O-glycosides	M-H	C21H22O9	56.7	88.9	0.39296	1.97251	0.000527387	0.00622858	-1.68387	0.311247	37811.6	121484	31087.2	22983.4	34478.8	57514.6	81415.2	16601.1	30161.4	35416.7	30645.8	67229.4	87010.5	106854	101424	115916	246609	110867	71066.6	190831	117034
8.94_500.2784m/z	500.278	8.93803	neg	LysoPE(20:4(5Z,8Z,11Z,14Z)/0:0)	HMDB0011517	Lipids and lipid-like molecules	Glycerophospholipids	Glycerophosphoethanolamines	M-H	C25H44NO7P	56.7	86.5	0.299503	7.66594	4.00482e-05	0.000894872	-0.81262	0.569347	1.4804e+06	2.60017e+06	1.53832e+06	2.18062e+06	1.80899e+06	869134	1.24122e+06	1.1523e+06	2.01929e+06	1.39666e+06	1.11705e+06	2.47728e+06	2.75374e+06	2.49247e+06	2.59408e+06	2.51924e+06	2.98998e+06	3.57804e+06	2.05968e+06	2.4994e+06	2.03778e+06
9.07_552.3310m/z	552.331	9.07025	neg	PC(17:1(10Z)/0:0)	LMGP01050002	Lipids and lipid-like molecules	Glycerophospholipids	Glycerophosphocholines	M+FA-H	C25H50NO7P	56.5	87.8	0.59303	1.88112	0.0063186	0.0383265	-0.537782	0.688829	190250	276193	97297.6	233119	254581	70707.6	176851	273906	270782	174299	160702	215469	267619	245041	260165	260988	353323	309969	270522	239581	339250
4.86_321.0438m/z	321.044	4.86358	neg	[4-(7-hydroxy-3,4-dihydro-2H-1-benzopyran-3-yl)phenyl]oxidanesulfonic acid	HMDB0141213	Phenylpropanoids and polyketides	Isoflavonoids	Isoflavans	M-H	C15H14O6S	56.3	85.8	-0.178362	8.89264	2.7623e-07	2.50385e-05	-2.06718	0.238626	404277	1.69419e+06	591701	264861	299354	409890	897863	187532	244916	375851	366530	1.05823e+06	1.7513e+06	1.47899e+06	1.41897e+06	1.59998e+06	2.17508e+06	1.30051e+06	1.61682e+06	2.14911e+06	2.39294e+06
9.12_527.3010n	528.308	9.12278	pos	LysoPE(0:0/22:5(7Z,10Z,13Z,16Z,19Z))	HMDB0011495	Lipids and lipid-like molecules	Glycerophospholipids	Glycerophosphoethanolamines	M+H, M+Na	C27H46NO7P	56.3	88.4	-0.285191	1.40541	0.0123658	0.0612921	-0.800137	0.574295	78433.2	136573	47597.1	121754	183555	39648.9	57125.1	53286.8	87865.3	72020.4	43046.2	124162	139218	124598	149011	130482	127710	248643	83642	132941	105323
10.03_508.3406m/z	508.341	10.0333	neg	1-O-(2-methoxy-4Z-hexadecenyl)-sn-glycero-3-phosphocholine	LMGP01060043	Lipids and lipid-like molecules	Glycerophospholipids	Glycerophosphocholines	M-H	C25H52NO7P	56.2	89.6	-0.54445	1.39712	0.0208099	0.0873787	-0.348422	0.785443	186409	237329	208754	264728	175971	170828	107306	225532	203140	177448	143972	236796	315314	228393	244350	229225	219443	278830	154398	235015	231533
10.90_552.4021m/z	552.402	10.901	pos	PC(20:0/0:0)	LMGP01050045	Lipids and lipid-like molecules	Glycerophospholipids	Glycerophosphocholines	M+H	C28H58NO7P	56.2	85.2	-0.470024	4.38039	0.016984	0.0761183	-0.734936	0.600845	812202	1.35177e+06	575762	1.41057e+06	955669	334123	365103	731175	1.57359e+06	754617	609210	1.4503e+06	2.10429e+06	1.20954e+06	1.2674e+06	1.2711e+06	1.22256e+06	1.8433e+06	392280	1.5583e+06	1.19859e+06
8.95_519.3322n	520.339	8.95353	pos	PC(18:2(2E,4E)/0:0)	LMGP01050034	Lipids and lipid-like molecules	Glycerophospholipids	Glycerophosphocholines	M+H, M+Na, M+H-H2O	C26H50NO7P	56.2	82.9	-0.544989	27.6635	0.00312066	0.0230325	-0.350869	0.784112	6.45904e+07	8.23739e+07	5.23545e+07	7.94988e+07	8.60488e+07	5.22584e+07	5.07732e+07	7.36809e+07	7.64442e+07	6.03655e+07	4.98887e+07	7.82343e+07	8.14068e+07	7.58093e+07	9.32878e+07	7.92079e+07	8.36006e+07	9.3948e+07	7.00472e+07	7.99139e+07	8.82834e+07
4.78_297.0979m/z	297.098	4.77917	neg	2-Phenylethanol glucuronide	HMDB0010350	Organic oxygen compounds	Organooxygen compounds	Carbohydrates and carbohydrate conjugates	M-H	C14H18O7	56.1	83.4	-0.207232	1.27617	0.002168	0.0177715	-1.55314	0.340768	18580.4	54525.1	3088.51	9008.27	824.356	7042.19	24021.4	36532.6	42858.1	18168.5	25679.6	2634.61	40206.2	45783	54995.8	49759.1	103199	40809.3	71531.9	67139.8	69193
6.23_335.0596m/z	335.06	6.22745	neg	{4-[(1E)-3-(4-hydroxy-2-methoxyphenyl)prop-1-en-1-yl]phenyl}oxidanesulfonic acid	HMDB0130353	Unclassified	Unclassified	Unclassified	M-H	C16H16O6S	56.1	85.9	0.349262	3.52404	2.64161e-05	0.000659402	-2.48503	0.178621	46826.5	262156	78299.7	31371.2	25106	26999.9	118413	24329.2	25058.7	42737.7	49123.7	134169	255250	226356	189967	245280	289086	263230	432082	131421	454715
8.92_524.2783m/z	524.278	8.9224	neg	LysoPE(22:6(4Z,7Z,10Z,13Z,16Z,19Z)/0:0)	HMDB0011526	Lipids and lipid-like molecules	Glycerophospholipids	Glycerophosphoethanolamines	M-H	C27H44NO7P	55.9	82	0.104998	7.8528	0.000419845	0.00522213	-0.72808	0.603707	1.95888e+06	3.24476e+06	2.17967e+06	3.18197e+06	2.60917e+06	1.00833e+06	1.52436e+06	1.73611e+06	2.35152e+06	1.82951e+06	1.2093e+06	3.04836e+06	3.48146e+06	3.09236e+06	3.50863e+06	3.11613e+06	3.55142e+06	4.56004e+06	2.48993e+06	3.06907e+06	2.53017e+06
9.07_619.2890m/z	619.289	9.07025	neg	1-Arachidonoylglycerophosphoinositol	HMDB0061690	Lipids and lipid-like molecules	Glycerophospholipids	Glycerophosphoinositols	M-H	C29H49O12P	55.7	80.5	0.22394	6.97222	3.26126e-05	0.00076534	-0.952027	0.516906	939466	1.81748e+06	897227	1.27572e+06	1.15069e+06	742556	698659	979972	1.13606e+06	882961	691340	1.31487e+06	2.10385e+06	1.68411e+06	1.93144e+06	1.75445e+06	1.56789e+06	2.75799e+06	1.48102e+06	1.47707e+06	2.10212e+06
9.07_620.2958n	603.292	9.07118	pos	PI(20:4(5Z,8Z,11Z,14Z)/0:0)	LMGP06050006	Lipids and lipid-like molecules	Glycerophospholipids	Glycerophosphoinositols	M+H-H2O, M+Na, M+NH4, M+H	C29H49O12P	55.7	81.8	-0.631871	4.80095	2.86085e-05	0.000694989	-0.876394	0.544727	506614	930033	448814	634994	761712	388540	385969	511220	574399	476174	377705	719993	1.10307e+06	862736	1.02877e+06	899158	766846	1.31337e+06	807879	764239	1.03426e+06
1.13_333.0940m/z	333.094	1.12722	neg	(S)-a-Amino-2,5-dihydro-5-oxo-4-isoxazolepropanoic acid N2-glucoside	HMDB0029404	Organic oxygen compounds	Organooxygen compounds	Carbohydrates and carbohydrate conjugates	M-H	C12H18N2O9	55.6	82.2	0.165663	2.58437	0.0276691	0.106198	-0.738937	0.599181	242587	404865	344682	213515	2037.24	289235	363526	152041	274291	233666	310292	415088	397705	399093	279747	385379	96487.2	389978	529337	379231	776603
2.05_245.1141m/z	245.114	2.04608	neg	gamma-Glutamylvaline	HMDB0011172	Organic acids and derivatives	Carboxylic acids and derivatives	Amino acids, peptides, and analogues	M-H	C10H18N2O5	55.6	82	-0.953972	1.03926	0.048844	0.156135	-0.756352	0.591991	52684.2	88994.9	57793.3	71685.2	31782.9	49086.7	82665.1	31723.4	41440.8	48729	59251.7	66853.7	63928.8	79537.7	46463.5	83401.5	204900	125347	31702.1	100494	87321
9.23_504.3085m/z	504.308	9.22518	pos	LysoPE(20:3(11Z,14Z,17Z)/0:0)	HMDB0011514	Lipids and lipid-like molecules	Glycerophospholipids	Glycerophosphoethanolamines	M+H	C25H46NO7P	55.4	85.8	0.0389925	2.4007	8.16604e-05	0.00151642	-0.899893	0.535927	129910	242403	78460.9	190781	202226	76299.4	116207	124172	163936	119392	97717.1	201957	233662	221302	194221	230577	297096	357744	238583	224092	224795
9.46_506.3249m/z	506.325	9.46047	neg	PC(17:1(9Z)/0:0)	LMGP01050126	Lipids and lipid-like molecules	Glycerophospholipids	Glycerophosphocholines	M-H	C25H50NO7P	55.4	84.7	-0.528662	1.61528	0.0174688	0.0776432	-0.436294	0.739031	176300	238555	141292	223060	149299	115041	154222	316956	193591	162768	130467	209173	240433	214991	206593	225421	283802	303101	212639	196143	293256
2.34_328.1389m/z	328.139	2.33875	pos	N-(1-Deoxy-1-fructosyl)phenylalanine	HMDB0037846	Organic acids and derivatives	Carboxylic acids and derivatives	Amino acids, peptides, and analogues	M+H	C15H21NO7	55.3	81.9	-0.542033	1.52492	9.52286e-05	0.00169096	-1.04615	0.484259	38705.4	79927	53387.2	33125.9	25546.6	28679.3	30316.2	41321	55690.7	39105	41176.4	76164.7	64136.5	81159.4	56135.2	78732.1	77860.8	96392.7	80451	55871.2	132366
9.02_595.2892m/z	595.289	9.01925	neg	PI(18:2(9Z,12Z)/0:0)	LMGP06050010	Lipids and lipid-like molecules	Glycerophospholipids	Glycerophosphoinositols	M-H	C27H49O12P	55.2	82.5	0.55994	2.70105	5.42704e-05	0.00113576	-1.03472	0.488111	129335	264970	87745.2	185065	180239	88581.2	95466	128318	173939	121746	102913	225266	269915	242019	324044	254820	235615	416967	188262	209424	283370
0.75_161.1051n	162.112	0.752683	pos	L-Carnitine	34532	Organic nitrogen compounds	Organonitrogen compounds	Quaternary ammonium salts	M+H, 2M+H	C7H15NO3	55.1	84.2	-0.337414	4.72041	0.00123508	0.0115564	0.47034	1.38544	1.73447e+06	1.25193e+06	1.45228e+06	1.93435e+06	1.59804e+06	2.29978e+06	2.02309e+06	1.71459e+06	1.36441e+06	1.69246e+06	1.53128e+06	1.36922e+06	1.40186e+06	1.22935e+06	1.40743e+06	1.26045e+06	1.20017e+06	1.58412e+06	664145	1.2616e+06	1.141e+06
9.24_495.3321n	496.339	9.24122	pos	PC(16:0/0:0)[U] / PC(16:0/0:0)[rac]	182	Unclassified	Unclassified	Unclassified	M+H, M+Na, 2M+H, M+H-H2O	C24H50NO7P	54.8	79.2	-0.834879	40.9976	0.00363383	0.0257331	-0.415987	0.749507	1.17441e+08	1.56691e+08	1.38338e+08	1.60607e+08	1.44579e+08	8.37687e+07	7.32754e+07	1.25191e+08	1.30946e+08	1.10277e+08	8.99901e+07	1.56699e+08	1.80666e+08	1.44185e+08	1.76638e+08	1.4946e+08	1.66909e+08	1.75191e+08	1.10942e+08	1.54941e+08	1.51283e+08
0.71_174.1116n	175.119	0.70895	pos	L-Arginine	13	Organic acids and derivatives	Carboxylic acids and derivatives	Amino acids, peptides, and analogues	M+K, M+H	C6H14N4O2	54.4	79.7	-0.558778	3.10301	0.000154913	0.0024315	0.54251	1.4565	621463	426681	796317	526034	502248	720358	475003	638481	547653	634803	752266	492268	364890	417595	385437	414899	415463	374274	413227	505978	482778
1.10_191.0191m/z	191.019	1.09818	neg	3-Oxoglutaric acid	HMDB0013701	Organic acids and derivatives	Keto acids and derivatives	Short-chain keto acids and derivatives	M+FA-H	C5H6O5	54.1	76	-4.08104	3.96794	0.0106573	0.0550436	-0.487174	0.713421	938983	1.31617e+06	702990	1.37575e+06	839672	550596	863322	873789	1.07748e+06	909577	1.25767e+06	1.36199e+06	1.05789e+06	1.37114e+06	979072	1.29104e+06	1.80486e+06	1.1686e+06	1.11598e+06	1.12123e+06	1.88987e+06
9.24_480.3095m/z	480.309	9.24193	neg	PC(15:0/0:0)	LMGP01050016	Lipids and lipid-like molecules	Glycerophospholipids	Glycerophosphocholines	M-H	C23H48NO7P	54.1	75.8	-0.217938	2.87219	0.000208168	0.00307249	-0.426896	0.743861	452651	608515	525094	624784	422836	353226	360297	461766	495993	435639	394219	619738	660455	585908	700748	594060	599907	631508	510714	646074	536040
9.76_507.2730m/z	507.273	9.76287	neg	PG(18:2(9Z,12Z)/0:0)	LMGP04050014	Lipids and lipid-like molecules	Glycerophospholipids	Glycerophosphoglycerols	M-H	C24H45O9P	54	79.1	0.336265	1.31221	8.36261e-05	0.00153684	-0.961809	0.513413	34923.5	68022.3	30838.4	55200.7	57836.5	25981.2	17729.5	24093.8	52454.6	32455.1	17721.9	54192.2	68228.8	62974.3	63420.2	64633.5	52919.8	93566	80589.7	71070.3	68628.3
8.52_499.2697n	500.277	8.51833	pos	LysoPE(0:0/20:5(5Z,8Z,11Z,14Z,17Z))	HMDB0011489	Lipids and lipid-like molecules	Glycerophospholipids	Glycerophosphoethanolamines	M+H, M+Na	C25H42NO7P	53.9	75.7	-0.303935	1.1817	0.00111302	0.0106831	-0.840106	0.558603	39737.5	71137.3	23271.2	49464.2	78119.3	17762.7	39159.4	36199.8	56330.5	36810.6	20519.5	61140.1	61217.5	64809	56573.7	68151.7	71133.3	110553	71822.5	63771.1	82200.9
0.71_257.1027n	280.092	0.70895	pos	Glycerophosphocholine	HMDB0000086	Lipids and lipid-like molecules	Glycerophospholipids	Glycerophosphocholines	M+Na, M+K, 2M+Na	C8H20NO6P	53.7	71.3	-0.654542	4.04214	0.0133466	0.0645898	0.517356	1.43133	1.42678e+06	996820	961008	1.66047e+06	1.92342e+06	1.08469e+06	1.65859e+06	1.39695e+06	1.50775e+06	1.29949e+06	1.34865e+06	1.05237e+06	877781	881111	883423	912953	1.00121e+06	1.2005e+06	371873	926428	1.86055e+06
0.75_175.0957n	198.085	0.752683	pos	Citrulline	HMDB0000904	Organic acids and derivatives	Carboxylic acids and derivatives	Amino acids, peptides, and analogues	M+H, M+Na, M+K	C6H13N3O3	53.3	69.8	-0.119653	1.51117	0.00480922	0.0313475	0.334691	1.26111	269436	213650	332751	216201	226761	328667	244317	234492	239201	273460	329070	215209	174436	208151	191325	206800	243483	236432	236980	186563	237124
1.43_293.1472n	294.154	1.42827	pos	N-(1-Deoxy-1-fructosyl)leucine	HMDB0037840	Organic acids and derivatives	Carboxylic acids and derivatives	Amino acids, peptides, and analogues	M+H, M+Na, M+H-H2O	C12H23NO7	53.3	70.4	-0.82572	3.40143	4.46543e-05	0.000979759	-1.00531	0.498162	199606	400685	263145	200956	132861	162244	167293	179211	276997	200326	213422	385858	340209	391015	284972	394377	419844	486447	375304	292887	635937
8.55_511.3274n	512.335	8.55383	pos	Scyphostatin A	LMSP01080060	Lipids and lipid-like molecules	Sphingolipids	Sphingoid bases	M+H, M+Na	C31H45NO5	53.2	78.8	-4.60164	1.12254	0.026216	0.102488	-0.311244	0.805947	139798	173458	177749	157069	164923	108964	80694.3	199202	150687	130899	87996.4	153403	181348	159283	181048	164732	183560	179142	182364	150864	198841
8.48_372.3106m/z	372.311	8.4828	pos	Tetradecanoylcarnitine	HMDB0005066	Lipids and lipid-like molecules	Fatty Acyls	Fatty acid esters	M+H	C21H41NO4	53.1	70.8	-0.623673	1.54978	0.0113015	0.0573402	-0.951435	0.517118	59381.7	114832	51892.5	105189	74029	96920.4	39611.5	64028	29439.7	55314.6	18010	117004	108750	106250	121330	108316	78910.4	75840.4	56899	128588	246431
0.84_191.0191m/z	191.019	0.843233	neg	Isocitrate	3328	Organic acids and derivatives	Carboxylic acids and derivatives	Tricarboxylic acids and derivatives	M-H	C6H8O7	53	70.7	-3.2258	2.58729	0.0187421	0.081431	-0.540745	0.687416	381133	554443	283230	583907	424723	180212	274714	367489	419931	369317	526673	581687	397094	564803	414525	536248	799809	495801	437971	450093	866398
1.11_279.1316n	280.139	1.1106	pos	N-(1-Deoxy-1-fructosyl)valine	HMDB0037844	Organic acids and derivatives	Carboxylic acids and derivatives	Amino acids, peptides, and analogues	M+H-H2O, M+H	C11H21NO7	52.5	67	-0.602072	1.912	7.7307e-05	0.0014582	-0.704535	0.61364	105625	172129	135377	107673	78917.3	85474.6	69563.1	100206	118498	108887	146029	165792	163980	169433	138993	173201	224954	186361	136637	145134	216802
9.58_621.3049m/z	621.305	9.57928	neg	PI(20:3(8Z,11Z,14Z)/0:0)	LMGP06050021	Lipids and lipid-like molecules	Glycerophospholipids	Glycerophosphoinositols	M-H	C29H51O12P	52.3	67.2	0.525122	2.36283	4.43259e-05	0.000974923	-1.35651	0.390525	63759.6	163267	37188.5	117512	82601.8	35801.3	47812.2	96596.9	61653.5	57586.6	37084.3	103102	162028	143663	156521	155456	157871	271823	132452	136129	213621
9.12_526.2940m/z	526.294	9.1216	neg	PE(22:5(4Z,7Z,10Z,13Z,16Z)/0:0)	LMGP02050069	Lipids and lipid-like molecules	Glycerophospholipids	Glycerophosphoethanolamines	M-H	C27H46NO7P	52.1	69	0.189068	1.30853	0.00229093	0.0184791	-0.945716	0.519172	43731.6	84233.4	32124.2	74687.7	76170.4	20108.4	32919.9	30042.3	60024.2	39915.3	27592.1	75318.3	86856.3	75989.2	92751.3	79914.8	81400.1	154663	49376.6	78526.9	67537.6
9.66_382.2717n	400.306	9.65837	pos	14-F2-dihomo-IsoP	LMFA03110169	Lipids and lipid-like molecules	Fatty Acyls	Eicosanoids	M+NH4, M+K, M+Na, M+H	C22H38O5	52.1	65.7	-0.49924	6.25169	0.0135009	0.0650448	-5.15646	0.0280382	29100.7	1.03789e+06	32953.7	46708.2	25034.8	26364.4	24936.2	33277.6	22212	30049.1	20369.8	320273	1.21464e+06	1.26875e+06	200984	1.25085e+06	313234	805177	3.92874e+06	472760	603535
8.54_556.3258m/z	556.326	8.54143	neg	PS(O-18:0/0:0)	LMGP03060002	Lipids and lipid-like molecules	Glycerophospholipids	Glycerophosphoserines	M+FA-H	C24H50NO8P	52	63.4	0.466327	1.10228	0.00676178	0.0400761	-0.410771	0.752221	80230.2	106658	105429	98547.8	70552.7	69230.2	47509.9	119884	87546.5	74994.9	48377.7	100652	117288	97170.2	108200	100373	117738	109427	97080.9	93828.3	124820
9.07_400.3418m/z	400.342	9.07118	pos	L-Palmitoylcarnitine	HMDB0000222	Lipids and lipid-like molecules	Fatty Acyls	Fatty acid esters	M+H	C23H45NO4	51.8	64.2	-0.771238	3.64957	0.00762906	0.043305	-1.08726	0.470653	257702	547542	181290	632810	240404	315985	135083	276150	96601.5	243978	197020	593983	761551	517259	506182	512434	258936	334050	320347	565480	1.1052e+06
10.03_523.3635n	524.371	10.0274	pos	enantio-PAF C-16	43413	Unclassified	Unclassified	Unclassified	M+H, M+K, M+Na, M+H-H2O	C26H54NO7P	51.7	60	-0.494285	27.0687	0.00994962	0.0523013	-0.389043	0.763636	5.94875e+07	7.79003e+07	6.68624e+07	8.3911e+07	6.79702e+07	4.91552e+07	3.06604e+07	6.33653e+07	7.21837e+07	5.67418e+07	4.45373e+07	8.0008e+07	8.8815e+07	7.39151e+07	8.69727e+07	7.49551e+07	7.76316e+07	9.29289e+07	5.124e+07	7.47617e+07	7.77751e+07
3.36_366.1427n	367.15	3.35712	pos	Tetrahydropentoxyline	HMDB0029992	Alkaloids and derivatives	Harmala alkaloids	Unclassified	M+H, M+Na, M+H-H2O	C17H22N2O7	51.7	62.9	0.0835924	1.16724	8.80007e-05	0.00160135	-0.796476	0.575754	33273.8	57791.7	56121.3	28436.1	27481.1	30120.3	29386.6	33971.6	36624.8	33595.8	23726.6	51840.6	52653	58358.5	51958.1	57958.1	50260.6	78428.2	59677.9	41548.8	75233
4.67_418.1263n	436.16	4.66678	pos	Equol 7-O-glucuronide	HMDB0041732	Phenylpropanoids and polyketides	Isoflavonoids	Isoflavonoid O-glycosides	M+H, M+NH4, M+H-H2O	C21H22O9	51.3	59.8	-0.260088	1.27406	0.0008874	0.00903155	-1.55069	0.341348	18751.9	54935	14465.7	9810.2	18628.7	29311.2	42624.7	8847.03	13634.8	17429.1	14015.9	32609.8	39137.4	48027.1	49341.5	52239	111172	46605.8	32690.1	86808	50719.6
7.06_230.2477m/z	230.248	7.06188	pos	Xestoaminol C	53933	Unclassified	Unclassified	Unclassified	M+H	C14H31NO	51.3	59	-0.399327	2.04181	0.000129975	0.00214207	-0.326677	0.797371	324440	406888	315435	363573	346584	327824	273699	328067	365884	323345	275552	336826	482202	389761	396347	403352	427480	440529	377223	421375	393783
9.50_428.3732m/z	428.373	9.49983	pos	Stearoylcarnitine	HMDB0000848	Lipids and lipid-like molecules	Fatty Acyls	Fatty acid esters	M+H	C25H49NO4	51.2	62.8	-0.580263	1.78358	0.00172434	0.0149749	-0.820254	0.566342	82515.4	145699	85560.2	169818	79908.1	75275.1	37048.9	91839	42526.8	79254.5	81408.1	180126	187556	138607	159965	137759	98457.3	123404	83746.5	158484	188883
4.71_956.4845m/z	956.484	4.70987	neg	CDP-DG(16:1(9Z)/18:2(9Z,12Z))	HMDB0115952	Lipids and lipid-like molecules	Glycerophospholipids	CDP-glycerols	M-H2O-H	C46H79N3O15P2	50.2	57.8	3.79033	4.21567	0.00386469	0.0268952	2.11579	4.33426	531936	122728	1.39189e+06	768890	552388	404157	117840	216707	566331	488857	280363	45198	82433.8	111541	319761	114232	131458	175131	66805.9	129925	50797.6
8.97_547.3480m/z	547.348	8.96955	pos	LysoPE(0:0/22:4(7Z,10Z,13Z,16Z))	HMDB0011493	Lipids and lipid-like molecules	Glycerophospholipids	Glycerophosphoethanolamines	M+NH4	C27H48NO7P	50.2	80	-4.99233	1.37291	0.00435479	0.0292803	-0.382172	0.767282	150478	196118	180337	174129	190200	115936	116749	167644	158522	140140	110642	191001	208045	184886	236326	189584	199099	235045	128367	199021	189802
0.63_308.1583n	309.165	0.6342	pos	1-[(5-Amino-5-carboxypentyl)amino]-1-deoxyfructose	HMDB0034879	Organic oxygen compounds	Organooxygen compounds	Carbohydrates and carbohydrate conjugates	M+H-H2O, M+H	C12H24N2O7	50.1	54.6	-0.0430552	1.20264	0.000246726	0.00346731	-0.559042	0.678753	59933.2	88299	85499.9	51788.5	57754.2	64026.9	22921.9	53886.5	70607.4	60391	72522.1	88489	91840.5	84035.6	88820.6	85821.9	101473	95144.6	74550.9	77266	95547.2
0.00_201.1848m/z	201.185	0.00231667	pos	Lauric acid	357	Lipids and lipid-like molecules	Fatty Acyls	Fatty acids and conjugates	M+H	C12H24O2	49.6	50.6	-0.715317	1.01293	8.2559e-08	1.19735e-05	0.339628	1.26543	77625.7	61343.3	74198.1	70960.5	74963.2	77868.9	84023.4	78638	75805.5	79494.5	82679	60750.6	58525.6	63345.2	63142.9	63619.4	59412.7	56855.9	68562	63416.3	55802.4
0.71_180.0627n	225.061	0.712017	neg	Allose	HMDB0001151	Organic oxygen compounds	Organooxygen compounds	Carbohydrates and carbohydrate conjugates	M-H, M+FA-H	C6H12O6	48.8	51.3	-3.65066	4.17234	1.74892e-05	0.000486843	-0.383991	0.766315	984613	1.28487e+06	981310	1.12479e+06	903702	1.03048e+06	1.20087e+06	835576	901232	930817	952740	1.35326e+06	1.38242e+06	1.238e+06	1.20958e+06	1.26101e+06	1.36488e+06	1.36009e+06	1.27745e+06	1.04035e+06	1.36164e+06
1.17_343.1266n	344.134	1.17263	pos	N-(1-Deoxy-1-fructosyl)tyrosine	HMDB0037845	Organic acids and derivatives	Carboxylic acids and derivatives	Amino acids, peptides, and analogues	M+H-H2O, M+H	C15H21NO8	48.8	50.4	-0.440929	1.63531	1.54494e-06	8.36697e-05	-1.20768	0.432965	33602.4	77610.1	41724.4	34946	27195.4	29880.2	26053.9	24004.4	47481.4	33377.1	37759.2	67251.8	62262.1	75830.7	56781.1	76828.9	89615.8	91919.3	75667.8	66455.2	113488
9.19_426.3574m/z	426.357	9.19202	pos	Elaidic carnitine	HMDB0006464	Lipids and lipid-like molecules	Fatty Acyls	Fatty acid esters	M+H	C25H47NO4	48.6	49.3	-1.01051	2.89655	0.0321663	0.117568	-1.19462	0.436901	162556	372067	32229.7	533953	148535	131532	103211	256512	29672.8	151780	75583.3	367921	586412	338828	366619	345427	96131.4	140375	253185	341139	884633
9.60_690.4547n	708.489	9.59753	pos	Butyl 4'-O-butanoyl-6-O-hexadecanoyl-neohesperidoside	LMSL05000005	Lipids and lipid-like molecules	Saccharolipids	Other acyl sugars	M+NH4, M+K, M+Na, M+H	C36H66O12	47.8	41.1	-1.02446	16.3073	0.0481943	0.154569	-7.58412	0.00521137	43063	8.26328e+06	67270.7	140830	16592.3	18399.7	10395.4	84779.4	3099.86	44760.3	1439.23	1.437e+06	5.95531e+06	1.0106e+07	1.22554e+06	9.86214e+06	1.95593e+06	5.83395e+06	3.98289e+07	2.85394e+06	3.57408e+06
8.68_398.3264m/z	398.326	8.67795	pos	trans-Hexadec-2-enoyl carnitine	HMDB0006317	Lipids and lipid-like molecules	Fatty Acyls	Fatty acid esters	M+H	C23H43NO4	47.4	42.1	-0.196321	1.8191	0.0140105	0.0665544	-1.25393	0.419304	55386.2	132091	18586.4	126345	67457	77694	46526.3	79492	17170.9	50842.5	14361.4	126361	149388	118890	121487	123239	69708.4	72971.9	70484.8	135175	333202
4.85_201.0221m/z	201.022	4.84782	neg	4-ethylphenylsulfate	HMDB0062551	Organic acids and derivatives	Organic sulfuric acids and derivatives	Arylsulfates	M-H	C8H10O4S	47.1	45	-2.77563	1.88016	0.0113668	0.0575604	-1.25722	0.41835	62519.6	149443	10714.4	22080.4	3079.76	23706.9	72408.3	164935	125932	64215.2	75604.3	5924.45	103422	126394	85354.5	136196	231558	188689	265713	156602	194578
6.13_243.1834n	244.191	6.1308	pos	N-Undecanoylglycine	HMDB0013286	Organic acids and derivatives	Carboxylic acids and derivatives	Amino acids, peptides, and analogues	M+H, M+K, M+Na, 2M+Na, 2M+H, M+H-H2O	C13H25NO3	47.1	38	-0.269764	1.7362	0.00105995	0.0102964	-0.120824	0.919662	726988	790494	657519	705486	743161	722702	757110	770067	698366	723555	764923	782729	827324	769287	804945	785743	724313	816470	814987	825517	753629
0.00_163.0968m/z	163.097	0.00231667	pos	Dimethicone	89344	Unclassified	Unclassified	Unclassified	M+H	C6H18OSi2	47	46.7	-0.47377	2.04383	0.000305018	0.0040547	0.215032	1.16073	579638	499374	555396	517024	557863	585715	643538	567731	580877	591119	617480	570137	482888	517312	530979	517115	482472	443451	521453	489496	438439
4.45_843.4006m/z	843.401	4.45095	neg	Blasticidin S	HMDB0030452	Organooxygen compounds	Carbohydrates and carbohydrate conjugates	Sugar acids and derivatives	2M-H	C17H26N8O5	46.6	55.3	3.14434	3.26809	0.000138774	0.00226649	1.7875	3.45216	287450	83266.6	524924	342677	278651	335375	60892.3	170988	243792	269414	360336	78973.5	81169.3	78525.3	144317	79194.4	83229.9	80886.1	55213	103797	47360.1
14.03_191.0569m/z	191.057	14.027	neg	D-altro-D-manno-Heptose	HMDB0029952	Organic oxygen compounds	Organooxygen compounds	Carbohydrates and carbohydrate conjugates	M-H2O-H	C7H14O7	46.3	41.7	3.66304	2.42004	1.70306e-05	0.000481471	0.47929	1.39406	369746	265230	284114	308047	323229	385534	421486	404585	379233	387000	434486	267975	271047	283905	253423	281211	238023	257087	297893	256587	245149
0.76_195.0504m/z	195.05	0.755683	neg	D-Ribose	HMDB0000283	Organic oxygen compounds	Organooxygen compounds	Carbohydrates and carbohydrate conjugates	M+FA-H	C5H10O5	46.2	39.5	-3.99468	1.64512	0.0379069	0.13146	-0.622487	0.64955	155643	239617	192069	126085	72380.9	158972	211430	80778	129269	153397	276406	198407	170276	242332	132695	242103	455540	230339	147065	267819	309591
8.52_498.2627m/z	498.263	8.52395	neg	LysoPE(20:5(5Z,8Z,11Z,14Z,17Z)/0:0)	HMDB0011519	Lipids and lipid-like molecules	Glycerophospholipids	Glycerophosphoethanolamines	M-H	C25H42NO7P	45.8	36.5	0.188562	1.0961	0.000759643	0.00806523	-0.97624	0.508303	26666.4	52461.7	16351.1	38082.7	50804.8	7973.28	29734.2	24777.5	37440.1	24508.2	10326.1	44449.8	44016.8	47575	38289.7	49893.2	53635.5	85607.1	52565.9	45438	63146.1
8.87_619.2891m/z	619.289	8.87128	neg	1-arachidonoyl-sn-glycero-3-phospho-1D-myo-inositol	HMDB0062722	Lipids and lipid-like molecules	Glycerophospholipids	Glycerophosphoinositols	M-H	C29H49O12P	45	33.9	0.351369	1.36956	0.00836145	0.04624	-0.579166	0.669351	104711	156436	90688.6	113797	214589	80416.1	79019.9	109219	94802.8	99825.6	60040.1	115776	179956	150319	168815	152729	128408	218552	128317	143451	178041
0.95_269.0878m/z	269.088	0.94975	neg	D-erythro-L-galacto-Nonulose	HMDB0029955	Organooxygen compounds	Carbohydrates and carbohydrate conjugates	Glycosyl compounds	M-H	C9H18O9	44.8	28	-0.0863149	1.63757	0.00215855	0.0177078	-0.327658	0.796829	224952	282309	227019	185463	214268	235769	280410	193961	236244	211106	240325	299718	302012	268571	258123	270615	262561	324094	276510	209180	351702
14.19_136.1121m/z	136.112	14.1933	pos	4-Ethyl-2-methyl-5-propyloxazole	HMDB0037873	Organoheterocyclic compounds	Azoles	Oxazoles	M+H-H2O	C9H15NO	44.7	25.3	-0.152287	1.38999	0.00881259	0.0479044	0.121017	1.0875	608019	559097	580266	571311	566221	618519	654401	632082	581568	624671	643130	601377	568186	583238	580109	582175	520496	515690	598047	551377	490273
14.18_150.1277m/z	150.128	14.1759	pos	5-Butyl-4-ethyl-2-methyloxazole	HMDB0037885	Organoheterocyclic compounds	Azoles	Oxazoles	M+H-H2O	C10H17NO	44.3	23.9	-0.355038	1.43163	0.00659679	0.0394116	0.125092	1.09058	603333	553223	578910	567003	563600	612601	647124	621645	578856	619744	640511	594623	561217	577426	570910	576411	512523	508031	592575	552995	485520
0.71_161.1051n	184.094	0.70895	pos	Malonyl-Carnitin	HMDB0062496	Organic nitrogen compounds	Organonitrogen compounds	Quaternary ammonium salts	M+Na, M+K	C7H15NO3	44	24.4	-0.43739	1.49531	0.000292986	0.00392215	1.82752	3.54927	61081.6	17209.6	29271.3	75439.5	79317.2	125048	58396.6	55006	41371.1	55918.7	29966.1	21448.8	19015.3	14742.8	25277.8	15713.3	10158	15065.2	2423.72	25397.8	22853.7
2.25_250.0933m/z	250.093	2.25423	pos	Zidovudine	HMDB0014638	Nucleosides, nucleotides, and analogues	Pyrimidine nucleosides	Pyrimidine 2',3'-dideoxyribonucleosides	M+H-H2O	C10H13N5O4	44	33	-0.531544	1.14338	0.0158583	0.0724845	-1.28221	0.411165	22296.6	54227.8	11640	8867.55	17683.1	22451.4	43165.3	15544	30572.2	21043.1	29702.7	117504	42599.3	49838.8	24461.2	52514.6	15319.3	62504.9	30433.1	37655.8	109447
8.64_442.3525m/z	442.353	8.64248	pos	Hydroxypropionylcarnitine	HMDB0013125	Organic acids and derivatives	Hydroxy acids and derivatives	Beta hydroxy acids and derivatives	M+H	C25H47NO5	44	25.6	-0.414513	1.05835	0.0147306	0.0687875	-1.41843	0.374119	16279.6	43514.5	16097.2	23211.5	24799.1	22404.3	10223.9	19131.5	10456.5	14912.6	5279.55	35193.8	26136.8	41027.1	33392.8	40195.4	33361.6	27944.9	16789.5	60782.6	120320
0.75_117.0789n	257.147	0.752683	pos	Betaine	HMDB0000043	Organic acids and derivatives	Carboxylic acids and derivatives	Amino acids, peptides, and analogues	M+Na, 2M+Na, 2M+H	C5H11NO2	43.8	20.8	-0.434379	5.22646	3.658e-05	0.000833157	1.5337	2.89528	719202	248405	385496	407966	840109	592775	840744	660221	947526	698305	1.09968e+06	420506	111592	213594	208300	229981	471991	131696	218877	318310	159206
3.42_360.0856m/z	360.086	3.4227	neg	S-Lactoylglutathione	HMDB0001066	Organic acids and derivatives	Carboxylic acids and derivatives	Amino acids, peptides, and analogues	M-H2O-H	C13H21N3O8S	43.4	29.5	-3.87776	1.57003	4.55756e-05	0.000991067	-1.02112	0.492735	41194.8	83604.5	29348.3	42841	27357.4	37847.9	51425.4	47904.9	50326	45015.6	38686.9	80154.1	72336.8	85873.7	64594.7	87501.6	67047.6	101711	107301	48455.1	121069
0.84_347.0232m/z	347.023	0.843233	neg	Dehydro-L-(+)-ascorbic acid dimer	45119	Unclassified	Unclassified	Unclassified	M-H	C12H12O12	41.9	30	-6.98547	1.1964	0.00269444	0.0208061	-1.3724	0.386248	19983	51736.1	13392.7	29827.8	18398.5	1999.44	17585.4	15452.5	24772.4	18479.9	39938.2	59959.3	23954.6	51507.9	34815	48155.3	107775	44565.2	38605.6	29855.8	78167.6
1.80_417.1860n	418.193	1.79612	pos	Casimiroedine	68399	Phenylpropanoids and polyketides	Cinnamic acids and derivatives	Unclassified	M+Na, M+K, M+H	C21H27N3O6	41.9	28.3	-9.61051	1.06549	0.0281513	0.107413	-1.24988	0.420482	22565.7	53666.2	15613.8	11998.1	8631.66	21129.4	7491.89	32594.9	22038.6	27221	56371.9	140598	68224.4	49511.8	935.455	52178.6	36326	38350.4	37345.1	68649.8	44543.1
10.47_223.2055m/z	223.205	10.4743	pos	Nerolidol	90926	Lipids and lipid-like molecules	Prenol lipids	Sesquiterpenoids	M+H	C15H26O	41.8	13.2	-0.85381	1.36157	0.000476018	0.00577715	0.168801	1.12412	333323	296518	302950	317667	322640	331604	374023	336810	314209	344045	355958	300677	305985	311961	299877	310372	270149	285816	309025	295117	276199
7.01_273.2667n	274.274	7.01063	pos	C16 Sphinganine	LMSP01040001	Lipids and lipid-like molecules	Sphingolipids	Sphingoid bases	M+H-H2O, M+H	C16H35NO2	41.7	11.3	-0.117481	5.75	3.42518e-05	0.00079664	-0.304387	0.809786	2.53657e+06	3.13239e+06	2.56202e+06	2.55507e+06	2.3457e+06	2.46814e+06	2.3743e+06	2.48884e+06	3.03279e+06	2.56065e+06	2.44159e+06	3.48585e+06	3.3569e+06	3.18688e+06	3.24363e+06	3.10966e+06	2.89378e+06	3.1176e+06	2.54811e+06	3.20083e+06	3.1807e+06
13.56_131.0354m/z	131.035	13.5634	neg	(S)-2-Acetolactate	HMDB0006855	Organic acids and derivatives	Keto acids and derivatives	Short-chain keto acids and derivatives	M-H	C5H8O4	41.5	12.6	2.80397	5.33078	0.000221378	0.00321857	0.254049	1.19255	3.45425e+06	2.89653e+06	3.05516e+06	3.06678e+06	3.06085e+06	3.51297e+06	3.8532e+06	3.70423e+06	3.41717e+06	3.57691e+06	3.84103e+06	3.18256e+06	2.98081e+06	3.04332e+06	2.88224e+06	3.02163e+06	2.82456e+06	2.60289e+06	2.92575e+06	2.88088e+06	2.62064e+06
15.76_166.0482n	149.045	15.7591	pos	L-Lyxonate	HMDB0060255	Organic oxygen compounds	Organooxygen compounds	Carbohydrates and carbohydrate conjugates	M+H-H2O, M+H	C5H10O6	41.4	18.7	2.68624	1.51392	0.00120565	0.0113764	-0.697672	0.616566	79062.9	128231	58955.9	52271.8	63999.5	78456.4	63310.2	67466.7	57783.6	90460.2	178862	137081	124050	135344	135019	134672	122764	120634	135068	126563	111114
0.00_131.0887m/z	131.089	0.00231667	pos	3-Methylcyclohexanethiol	87746	Organosulfur compounds	Thiols	Alkylthiols	M+H	C7H14S	41.3	16.1	-1.23807	1.4189	6.88461e-09	1.88391e-06	0.491046	1.40546	108143	76944.6	102477	95884.1	103759	110472	119809	107152	108336	110740	114655	85702.7	73014.4	80088.7	81988.5	80110.2	72677.7	67457.7	80753.8	77656.3	69995.6
4.65_614.3458m/z	614.346	4.64908	pos	Gravelliferone	HMDB0030729	Phenylpropanoids and polyketides	Coumarins and derivatives	Hydroxycoumarins	2M+NH4	C19H22O3	41.1	15.2	-2.99599	5.10502	0.00653053	0.0391211	1.79064	3.45969	837596	242102	1.8992e+06	599974	853669	505288	603798	292821	1.65621e+06	771562	355849	31349.6	135158	209538	795294	223625	125046	339774	256363	252609	52262.2
15.97_271.2631m/z	271.263	15.9704	pos	2,6-Dimethyl-5-heptenyl octanoate	97290	Lipids and lipid-like molecules	Fatty Acyls	Fatty esters	M+H	C17H34O2	41	7.95	-0.367308	1.61375	0.000384942	0.00486308	-0.689644	0.620007	85630.6	138112	67525.6	62434.3	76009	77592	72732	71750.6	65305.1	96648.8	180678	141333	140031	143352	141263	143542	126486	127362	142723	145041	129989
0.71_156.0420m/z	156.042	0.70895	pos	5-amino-pentanoic acid	LMFA01100040	Lipids and lipid-like molecules	Fatty Acyls	Fatty Acids and Conjugates	M+K	C5H11NO2	40.9	11	-0.76945	2.28895	1.18649e-06	6.74812e-05	2.03133	4.08782	113247	27703.4	55974.9	74848.6	129887	123285	110352	111679	131221	107153	174819	55630.3	15768.9	23422.1	24009.6	25228.2	30975.1	14231.2	15102.7	47009.2	25656.7
14.03_157.0511m/z	157.051	14.027	neg	2-(Methoxymethyl)furan	HMDB0034247	Organoheterocyclic compounds	Heteroaromatic compounds	Unclassified	M+FA-H	C6H8O2	40.6	12	4.52099	3.33631	3.17298e-06	0.000139871	0.561222	1.47552	590989	400530	468410	473076	520501	614189	686660	652645	592014	618392	693012	423448	397942	426072	385321	422709	375156	368685	429828	396314	379823
14.04_159.0304m/z	159.03	14.0432	neg	Galactonolactone	HMDB0002541	Organoheterocyclic compounds	Lactones	Unclassified	M-H2O-H	C6H10O6	40.6	13.9	2.87821	1.51592	1.4895e-09	7.44902e-07	0.522992	1.43693	115633	80472.1	105847	104699	116318	122073	126131	120838	108222	119205	117365	86580.2	82215.9	85179.5	80097.8	84250.8	75714.9	73063.8	87218.8	77075.1	73324.6
0.74_177.1346m/z	177.135	0.737967	pos	Dimethylurea	HMDB0029198	Organic acids and derivatives	Organic carbonic acids and derivatives	Ureas	2M+H	C3H8N2O	40.3	4.48	-0.0326632	4.05288	8.62092e-05	0.00157467	-4.75897	0.0369324	11877.8	321610	23875.4	22171.7	20248.5	6697.8	4522.27	13792.3	596.154	13315.2	1681.18	140802	359478	316518	431760	335097	269854	286580	755659	203442	116913
1.10_381.0300m/z	381.03	1.09818	neg	hesperetin 3'-O-sulfate	HMDB0029202	Phenylpropanoids and polyketides	Flavonoids	O-methylated flavonoids	M-H	C16H14O9S	40.3	21.7	3.6486	1.83208	0.00027941	0.00380496	-0.717676	0.608076	97313.9	160036	70356.1	138988	71438.9	50945.1	78880	104513	124874	91251.7	144578	204319	147049	152667	151470	154222	207192	120953	155853	139200	167432
3.42_423.0813m/z	423.081	3.4227	neg	N-phosphocreatinate(2-)	HMDB0062567	Unclassified	Unclassified	Unclassified	2M-H	C4H11N3O5P+	40.3	13.5	3.2111	1.21694	0.000646341	0.00721624	-0.996499	0.501215	28267.3	56397.6	26849.7	27274.9	17027.4	26979.2	32501.2	32007.5	37103.5	29881.4	24780.8	44237.7	50072.1	54900.1	39330	55170.8	44870	77083.6	75806.8	30052.8	92451.9
9.09_608.3185m/z	608.318	9.08717	neg	OOB-PE	LMGP20020034	Lipids and lipid-like molecules	Glycerophospholipids	Oxidized glycerophospholipids	M+FA-H	C27H50NO9P	40.1	13.3	-3.63799	1.28012	0.00387369	0.0269449	-0.395789	0.760073	115619	152116	139655	152364	103994	84315	81021.9	138498	135998	109712	95012.8	136443	168153	143911	175381	146844	165122	176163	106579	153611	148948
0.48_166.0482n	149.045	0.479183	pos	L-Xylonate	HMDB0060256	Organic oxygen compounds	Organooxygen compounds	Carbohydrates and carbohydrate conjugates	M+H-H2O, M+H	C5H10O6	40	11.8	2.52409	2.50434	0.000151097	0.0023897	0.203136	1.1512	910408	790835	831376	875870	858957	917359	987115	919161	913081	935020	955729	867084	803308	825467	828010	822386	722005	730810	837696	781080	690504
1.10_314.0500n	359.048	1.09818	neg	5'-Phosphoribosyl-N-formylglycinamide	HMDB0001308	Nucleosides, nucleotides, and analogues	Glycinamide ribonucleotides	Unclassified	M-H, M+FA-H	C8H15N2O9P	40	8.3	-4.98266	2.07631	0.00263596	0.0204763	-0.617671	0.651722	177997	273118	107362	216957	155029	128913	183242	156058	229111	167029	258270	297273	217390	265694	205643	264158	420231	256933	244209	214568	345076
0.81_323.0247m/z	323.025	0.814217	neg	4-Hydroxy-2-oxoglutaric acid	HMDB0002070	Organic acids and derivatives	Keto acids and derivatives	Gamma-keto acids and derivatives	2M-H	C5H6O6	39.9	5.45	-2.66728	1.5067	0.00639509	0.0386289	-0.754182	0.592883	73435.9	123863	64942.2	67169	36634.5	69590	101038	46973.6	86689.6	70011.5	117875	135535	85106.1	119429	68838.8	116761	147832	120780	171593	72411.4	200340
14.03_113.0482n	225.089	14.027	neg	1-Pyrroline-2-carboxylic acid	HMDB0006875	Organoheterocyclic compounds	Pyrrolines	Unclassified	M+FA-H, 2M-H	C5H7NO2	39.9	13.4	4.3758	4.28466	8.63208e-07	5.64763e-05	0.779041	1.71599	727305	423840	530033	535577	668182	780622	862317	809353	735902	765674	858083	436455	425801	452686	405584	447618	377793	399751	460512	419508	412692
9.47_560.3111m/z	560.311	9.46785	pos	PC(18:1(11Z)/0:0)	LMGP01050138	Lipids and lipid-like molecules	Glycerophospholipids	Glycerophosphocholines	M+K	C26H52NO7P	39.5	0	-0.370159	1.41821	0.0257588	0.101214	-0.257609	0.836473	266181	318218	212713	306890	323659	191198	232743	374703	285173	244671	223880	345511	323819	296474	306797	304988	289110	331405	323425	281958	378697
0.72_244.0791m/z	244.079	0.723467	pos	N-Acetylgalactosamine	HMDB0000212	Organic oxygen compounds	Organooxygen compounds	Carbohydrates and carbohydrate conjugates	M+Na	C8H15NO6	39.3	0	-0.395539	1.36466	0.00100412	0.00991341	-0.428565	0.743	115059	154857	103925	112789	136101	125248	150785	103643	102890	109057	91089.3	196392	155343	144183	165406	149646	171860	167853	124569	111522	161792
0.75_279.1913m/z	279.191	0.752683	pos	hydroxyisovaleroyl carnitine	HMDB0062555	Lipids and lipid-like molecules	Fatty Acyls	Fatty acid esters	M+NH4	C12H23NO5	39.2	0	-0.511775	1.8685	1.25071e-05	0.00038925	1.16545	2.24304	109229	48697	94297	94885	93557.1	108979	96547.6	97253.7	117393	106409	173742	54785.1	29464.7	45157.2	38663.7	46140.6	83414.3	42784.9	35803.2	75022.3	35734
10.03_310.1617m/z	310.162	10.0274	pos	Histidinyl-Histidine	HMDB0028887	Organic acids and derivatives	Carboxylic acids and derivatives	Amino acids, peptides, and analogues	M+NH4	C12H16N6O3	39.2	0	-1.83808	1.12608	0.00600258	0.0368722	0.4028	1.32207	130765	98908.8	136077	164626	138525	109795	75172.7	144618	168493	125289	114285	84818.7	104196	93691.2	105317	95489.9	87007	109830	78366.4	108110	122262
14.04_172.0622m/z	172.062	14.0432	neg	N-Acetyl-L-glutamate 5-semialdehyde	HMDB0006488	Organic acids and derivatives	Carboxylic acids and derivatives	Amino acids, peptides, and analogues	M-H	C7H11NO4	39.2	4.95	3.81474	2.81443	1.65928e-06	8.75075e-05	0.658026	1.57792	366052	231983	293306	290935	308760	372813	424053	403291	370431	383509	447367	258249	234051	246457	217068	244701	222123	214154	246768	226663	209599
4.12_329.1641n	659.336	4.11908	pos	(S)-Reticuline	HMDB0003601	Organoheterocyclic compounds	Isoquinolines and derivatives	Benzylisoquinolines	2M+H, 2M+K, 2M+Na, M+H	C19H23NO4	39.2	9.73	4.32178	2.05167	3.39323e-05	0.000792465	1.64541	3.12836	106043	33897.2	117952	114158	152360	104729	22742.7	62650.5	141073	106184	132537	36971.5	42102	31841.8	28582.7	32144.9	41632.6	43407.3	23900.7	30236.1	28152.8
10.69_297.2898m/z	297.29	10.6908	pos	Linoleamide	HMDB0062656	Lipids and lipid-like molecules	Fatty Acyls	Fatty amides	M+NH4	C18H33NO	39	0	-0.75868	2.03341	0.000185939	0.00281196	-0.670946	0.628095	138997	221300	110451	130815	188747	148853	94730.3	146772	179923	140124	110558	221005	257982	223818	181661	220623	224307	291170	184631	147049	260749
12.57_186.1025m/z	186.102	12.5659	pos	Beta-Carboline	HMDB0012897	Organoheterocyclic compounds	Indoles and derivatives	Pyridoindoles	M+NH4	C11H8N2	39	0	-0.492959	1.48219	0.000168444	0.00259061	0.257969	1.19579	262964	219908	257472	276821	238391	246356	278152	274607	252184	267723	274973	256680	253063	225730	219659	225466	215646	197798	210138	214952	179945
10.31_510.3917m/z	510.392	10.3052	pos	LysoPC(O-18:0)	HMDB0011149	Lipids and lipid-like molecules	Glycerophospholipids	Glycerophosphocholines	M+H	C26H56NO6P	38.9	0	-0.177922	1.43936	0.0216956	0.0900032	-0.466791	0.723572	156254	215948	180757	224494	195761	118428	84550.2	128450	210826	145708	117313	203997	207855	199341	217406	202233	252184	312946	100107	211195	252219
9.58_565.3532m/z	565.353	9.58173	pos	Malonoben	HMDB0031799	Benzenoids	Benzene and substituted derivatives	Phenylpropanes	2M+H	C18H22N2O	38.9	0	-0.921253	1.33284	0.0431853	0.14408	-2.73151	0.150569	9625.64	63928.5	21231.1	11189.9	6460.69	8456.01	10807.1	4939.06	6312.51	9776.71	7457.75	18691.6	11507.8	55938.3	15726.8	59182.2	50188.2	176010	221356	8513.85	22170.6
0.48_205.1074m/z	205.107	0.479183	pos	2-hydroxy-7-methyl-Octanedioic acid	LMFA01170136	Lipids and lipid-like molecules	Fatty Acyls	Fatty Acids and Conjugates	M+H	C9H16O5	38.8	0	1.54163	1.00312	5.54207e-10	3.82746e-07	0.580588	1.49546	46742.7	31256.4	41122.5	44031.4	43160.9	47119.5	51327.5	47107.5	47317.5	48333.3	51163.9	32963	30481	32531.6	31827.1	32491.5	28554.7	29437.9	33740.7	31472	29064.4
14.03_147.0667m/z	147.067	14.027	neg	Propionic acid	LMFA01010003	Lipids and lipid-like molecules	Fatty Acyls	Fatty Acids and Conjugates	2M-H	C3H6O2	38.8	0	3.05019	1.74792	5.43231e-06	0.000209788	0.499516	1.41374	181493	128378	146377	152376	158597	184128	204397	200980	180421	189679	216479	135534	132153	137100	123101	135901	117932	122927	136794	124835	117500
14.29_627.5347m/z	627.535	14.2901	pos	DG(18:0/20:4(5Z,8Z,11Z,14Z)/0:0)	HMDB0007170	Lipids and lipid-like molecules	Glycerolipids	Diradylglycerols	M+H-H2O	C41H72O5	38.8	0	-0.0033268	2.46154	0.0223654	0.0918104	0.917355	1.88865	369670	195733	487762	462124	318641	337531	344379	162934	247309	373462	592892	2962.89	3.74188e-07	162451	3.74188e-07	178696	318774	179708	235462	454822	424450
9.64_338.2454n	356.279	9.64338	pos	(+/-)14,15-DiHETrE	LMFA03050010	Lipids and lipid-like molecules	Fatty Acyls	Eicosanoids	M+NH4, M+Na	C20H34O4	38.8	0	-1.01372	2.76738	0.00373254	0.0262654	-6.39172	0.0119097	2113.07	177424	3102.33	4902.1	574.679	1518.91	423.183	3526.37	1034.95	2204.87	1730.25	63717.7	250336	221077	34992.2	215160	60476.3	154203	567374	89450.6	117458
1.30_257.0278m/z	257.028	1.29505	neg	Thiophene-4,5-epoxide	HMDB0060925	Phenylpropanoids and polyketides	Phenylpropanoic acids	Unclassified	M-H2O-H	C14H12O4S	38.7	4.81	-0.0309968	2.35823	0.00827688	0.045957	-0.619237	0.651015	266157	408834	108121	66537.4	232426	351766	440105	195005	420389	249691	331372	462955	368821	381070	272167	392518	362872	528427	456556	393968	468984
4.70_480.2552m/z	480.255	4.70215	pos	Suberylglycine	HMDB0000953	Organic acids and derivatives	Carboxylic acids and derivatives	Amino acids, peptides, and analogues	2M+NH4	C10H17NO5	38.7	0	0.0983125	1.54613	0.00198803	0.0165928	2.13806	4.4017	67117.2	15248	165151	89344.7	72623	59207	17381.9	27684.2	74392.4	61829.2	36440.6	5883.9	10037.9	13706.4	42559.1	14254.6	15807.8	20407.9	8779.33	15483.6	5559.53
8.36_445.2461n	446.253	8.3604	pos	Mivacurium Metabolite (Isoquinolinium, 1,2,3,4-tetrahydro-2-(3-hydroxypropyl)-6,7-dimethoxy-2-methyl	1328	Unclassified	Unclassified	Unclassified	M+H, M+NH4	C25H35NO6	38.7	0.0284	-0.667041	2.09837	0.0153841	0.0708529	-0.397459	0.759194	344101	453245	455593	266672	296693	355623	245322	483372	360572	336908	296153	573451	336464	445514	473206	459581	387274	361768	591065	550403	353720
8.84_548.2757n	566.322	8.83663	pos	PKOHA-PA	LMGP20070010	Lipids and lipid-like molecules	Glycerophospholipids	Oxidized glycerophospholipids	M+H-H2O, M+NH4	C26H45O10P	38.7	0	1.2026	1.19747	0.00163004	0.0143363	-0.530546	0.692293	71533.8	103329	96448.8	96423.9	97729.8	46649.4	50489.4	70517.2	75140.2	65542.9	44862.6	107100	108990	91668.5	128936	96945.4	109520	118740	73768.2	98152.9	99467.8
8.95_504.3095m/z	504.309	8.95372	neg	LysoPE(20:2(11Z,14Z)/0:0)	HMDB0011513	Lipids and lipid-like molecules	Glycerophospholipids	Glycerophosphoethanolamines	M-H	C25H48NO7P	38.7	1.23	-0.126372	2.29309	1.42756e-05	0.000427766	-0.42328	0.745727	256514	343978	210274	339958	240066	209207	231912	290828	300223	241781	244374	350505	340081	326445	342108	334424	346962	343136	336132	346072	373916
0.74_292.1977m/z	292.198	0.737967	pos	Glutaminyllysine	HMDB0028802	Organic acids and derivatives	Carboxylic acids and derivatives	Amino acids, peptides, and analogues	M+NH4	C11H22N4O4	38.6	0	-0.890202	2.2212	7.02733e-07	4.86011e-05	2.44784	5.45599	99368.8	18212.8	92899.9	55036	98717.8	97926.2	69733.2	107473	106324	97861.9	168347	37887.6	5218.25	15392.1	11768.7	16557.1	27351	5767.69	3668.7	35102.8	23413.7
14.42_211.0038m/z	211.004	14.4211	pos	Benzyl sulfate	HMDB0034782	Benzenoids	Benzene and substituted derivatives	Unclassified	M+Na	C7H8O4S	38.6	0	1.16611	1.49919	0.000389711	0.00490198	-0.250106	0.840835	237026	281894	220463	233217	219727	240817	259992	240835	223702	243227	251255	330485	297929	295472	292321	294583	263138	255797	288445	268687	232081
9.23_534.2958m/z	534.296	9.22518	pos	PC(O-14:0/2:0)	LMGP01020019	Lipids and lipid-like molecules	Glycerophospholipids	Glycerophosphocholines	M+K	C24H50NO7P	38.6	0	0.300204	1.16031	9.19302e-05	0.00164804	-0.168584	0.889716	209856	235869	213128	210356	227565	221119	200457	202440	213675	213316	186648	253645	234313	237020	235185	239667	222829	241206	245844	219179	229799
0.74_217.0293m/z	217.029	0.741167	neg	Aspartyl-Cysteine	HMDB0028750	Organic acids and derivatives	Carboxylic acids and derivatives	Amino acids, peptides, and analogues	M-H2O-H	C7H12N2O5S	38.5	2.55	2.10287	3.26587	0.0331368	0.120176	-0.118222	0.921323	3.55689e+06	3.86063e+06	3.26324e+06	3.46228e+06	3.5939e+06	3.86663e+06	4.30367e+06	3.38249e+06	3.22768e+06	3.46381e+06	3.44829e+06	4.1105e+06	3.74291e+06	3.85051e+06	3.69993e+06	3.89856e+06	3.82935e+06	3.90389e+06	4.01133e+06	3.37327e+06	4.18607e+06
8.73_664.3456m/z	664.346	8.73123	pos	OHOHA-PS	LMGP20040027	Lipids and lipid-like molecules	Glycerophospholipids	Oxidized glycerophospholipids	M+H	C31H54NO12P	38.5	0	-0.0815601	1.27812	2.86532e-06	0.000130678	-1.85565	0.276308	10623.8	38449.2	8165.67	15729.9	15916.7	4622.87	8824.25	6861.95	14875	9813.7	10804.6	44895.8	30819.1	36116.6	23313.5	36744.8	39718.8	64734.9	42940.4	26220.1	38988.6
9.46_634.3340m/z	634.334	9.46047	neg	OHHdiA-PE	LMGP20020043	Lipids and lipid-like molecules	Glycerophospholipids	Oxidized glycerophospholipids	M-H	C30H54NO11P	38.5	6.5	-3.39232	1.60493	0.0225222	0.0921928	-0.248922	0.841525	339513	403450	277579	398744	316868	243639	334693	494699	362253	314516	312627	373724	454673	375790	404396	389452	417201	447761	385703	360441	425358
0.00_369.3514m/z	369.351	0.00231667	pos	Cholesterol	LMST01010001	Lipids and lipid-like molecules	Sterol Lipids	Sterols	M+H-H2O	C27H46O	38.4	0	-0.364866	1.0855	3.59955e-06	0.000153995	1.52317	2.87423	30254.2	10526	27565.4	12359.7	30115.1	36641.7	39163.7	31036.7	26907.2	31771.5	36727.3	8496.14	725.57	10642.7	12142.3	10805.4	13099.1	5690	15583.8	15964.1	12111.4
11.01_577.4106n	578.418	11.0084	pos	LysoPC(22:1(13Z))	HMDB0010399	Unclassified	Unclassified	Unclassified	M+H, M+Na	C30H60NO7P	38.4	0	-0.203814	1.55692	0.00824666	0.0458418	-0.686947	0.621167	101483	163374	107078	170660	112771	40042.1	52053.7	106692	154424	93186.1	76437.1	151140	240558	145262	156237	152103	191170	227790	75612.4	152473	141398
10.66_207.0174m/z	207.017	10.6609	pos	2-Pyrroloylglycine	HMDB0059778	Organic acids and derivatives	Carboxylic acids and derivatives	Amino acids, peptides, and analogues	M+K	C7H8N2O3	38.3	0	4.27467	3.62055	1.18997e-09	6.63772e-07	0.523342	1.43728	661832	460475	601107	604417	620843	673224	710026	669836	653843	682809	740380	467090	452665	481956	458271	482333	432746	433852	495353	476406	424075
2.03_241.1128n	505.225	2.02512	pos	2-(4-Methyl-5-thiazolyl)ethyl hexanoate	HMDB0032421	Organoheterocyclic compounds	Azoles	Thiazoles	M+K, 2M+Na	C12H19NO2S	38.3	3.36	-3.67572	1.26696	0.0378484	0.131382	-1.08474	0.471477	41364.6	87734.1	37798.6	21805.5	18486.3	56354.6	15902.5	75141.7	36294.9	46506.1	63991.2	203978	101715	82893.7	5055.42	84908.4	62447.4	56307.4	42619.5	166108	71308.4
8.67_606.3029m/z	606.303	8.66502	neg	PKHdiA-PE	LMGP20020016	Lipids and lipid-like molecules	Glycerophospholipids	Oxidized glycerophospholipids	M-H	C28H50NO11P	38.3	8.51	-3.26999	1.00562	0.00967353	0.0512587	-0.697297	0.616726	37518.3	60834.5	17563.9	42410.2	35040.9	9651.82	45126.9	86864.1	40287.9	33766.4	26952.3	43802.7	54089	52756.6	46494.8	56966.2	66963.4	75855.7	76941.6	60208.1	74267.2
8.99_528.3095m/z	528.309	8.98562	neg	PE(22:4(7Z,10Z,13Z,16Z)/0:0)	LMGP02050014	Lipids and lipid-like molecules	Glycerophospholipids	Glycerophosphoethanolamines	M-H	C27H48NO7P	38.3	9.25	-0.17956	1.38135	8.91013e-05	0.0016153	-0.550041	0.683001	76535.8	112058	81018.3	86484.8	75260.1	64002	66047.9	108635	75695.6	70919.5	60759.8	123693	131348	106336	121797	108338	125568	103175	98915	121539	79874.8
14.29_887.5639m/z	887.564	14.2901	pos	PI(16:0/22:4(7Z,10Z,13Z,16Z))	HMDB0009794	Lipids and lipid-like molecules	Glycerophospholipids	Glycerophosphoinositols	M+H	C47H83O13P	38.2	0	-0.622559	2.64617	0.0176024	0.0780933	1.0209	2.02919	384580	189524	532497	490519	337065	319809	314001	168334	256194	392303	650500	949.123	1868.5	156911	3.74188e-07	172602	279059	172675	188372	479356	443448
9.24_296.1461m/z	296.146	9.24122	pos	Dothiepin	2429	Unclassified	Unclassified	Unclassified	M+H	C19H21NS	38.2	0.158	-2.07194	2.03459	5.49925e-07	4.04583e-05	0.564607	1.47898	211582	143059	219806	240227	232224	185198	158053	227232	232843	201500	207153	137133	158946	137267	131028	140408	148386	148234	137832	143051	148304
9.32_534.3551m/z	534.355	9.32197	pos	PE(0:0/22:2(13Z,16Z))	LMGP02050056	Lipids and lipid-like molecules	Glycerophospholipids	Glycerophosphoethanolamines	M+H	C27H52NO7P	38.2	0	-0.51223	1.13728	0.00132982	0.0122298	-0.681527	0.623505	44343.3	71119.4	23966.9	52515.7	64733.4	24034.7	34252.8	68584.1	54739.6	41336.4	34926.4	64679	63058.4	64628.7	80728.1	68027.5	73027.8	79971.5	59423	55006.1	102644
9.57_587.3662m/z	587.366	9.56527	pos	Lysyl-Lysine	HMDB0028956	Organic acids and derivatives	Carboxylic acids and derivatives	Amino acids, peptides, and analogues	2M+K	C12H26N4O3	38.1	0	3.72965	1.20159	0.042997	0.143683	-2.59145	0.165919	8717.69	52541.8	20604.4	12242.3	4544.87	5273.87	10326.2	4560.4	4999.85	8654.17	7253.2	14989	10672	45655.6	13368.1	48192.7	42827.9	139307	181737	6796.75	21872.2
10.71_813.6822m/z	813.682	10.7054	pos	SM(d18:1/24:1(15Z))	HMDB0012107	Lipids and lipid-like molecules	Sphingolipids	Phosphosphingolipids	M+H	C47H93N2O6P	38	0	-2.662	12.2358	0.00103406	0.0101194	1.10458	2.15036	5.86512e+06	2.72751e+06	5.07293e+06	5.88455e+06	6.60372e+06	6.10911e+06	7.02892e+06	4.97385e+06	4.70509e+06	5.69081e+06	6.71711e+06	3.74188e-07	3.74188e-07	2.25707e+06	11306.1	2.48278e+06	3.03254e+06	6.03145e+06	3.19565e+06	5.09209e+06	5.17222e+06
14.04_163.0618m/z	163.062	14.0432	neg	Mannitol	HMDB0000765	Organic oxygen compounds	Organooxygen compounds	Carbohydrates and carbohydrate conjugates	M-H2O-H	C6H14O6	37.8	0	3.18978	1.04303	3.15518e-06	0.000139511	0.461162	1.37665	68936.9	50075.8	60970.9	58526.9	58645.2	74038.8	77877.1	74634.8	67629.1	71404.8	76704.5	57023.3	48530.4	53368	48050.6	52933.7	46321	48023.8	53650.7	48108.1	44748.6
14.28_205.0171m/z	205.017	14.2755	pos	O-methoxycatechol-O-sulphate	HMDB0060013	Organic acids and derivatives	Organic sulfuric acids and derivatives	Arylsulfates	M+H	C7H8O5S	37.8	0.169	2.85082	1.74173	0.00879376	0.0478918	-0.199725	0.870716	516465	593150	485826	497661	504636	520609	580771	526467	479814	527234	525169	728723	644160	621109	623339	619339	533339	517742	606971	556318	480458
10.12_398.3265m/z	398.326	10.1171	pos	Isopersin	LMFA05000670	Lipids and lipid-like molecules	Fatty Acyls	Fatty alcohols	M+NH4	C23H40O4	37.6	0	-0.0590006	1.07138	3.36227e-06	0.000145997	0.956228	1.94023	41711.6	21498.3	44012.9	51155.1	37666.4	43580.8	37622.4	41667	42660.2	42827.9	34211.7	21403.7	33650.6	23619.3	20285.9	23380.4	10737.8	30448.6	16803.6	9531.21	25121.6
10.12_442.3523m/z	442.352	10.1171	pos	Hydroxybutyrylcarnitine	HMDB0013127	Organic acids and derivatives	Hydroxy acids and derivatives	Beta hydroxy acids and derivatives	M+H	C25H47NO5	37.6	0	-0.965959	1.13764	1.42986e-07	1.60754e-05	0.629966	1.54753	61666.7	39848.5	61769.9	66065.9	54322.7	56088.7	59715.7	69962.8	68895.6	63397.6	54781	37559	47017	41749.1	36132.6	42250.3	30891.3	39104.2	43942.7	34185	45653.8
14.04_161.0825m/z	161.082	14.0432	neg	Methyl (S)-2-Methylbutanoate	LMFA07010934	Lipids and lipid-like molecules	Fatty Acyls	Fatty esters	M+FA-H	C6H12O2	37.6	0	4.46139	1.0357	1.67491e-05	0.000478412	0.465256	1.38056	70307.9	50927	58416.8	61933.3	57805.2	70196.3	78849.1	73808.9	70966	73645.8	87149.3	52549	53391.3	54602.2	50270.6	53913.2	44285.2	50285.5	54784.9	48366	46821.8
4.00_566.2220m/z	566.222	3.99677	pos	(1xi,3S)-1,2,3,4-Tetrahydro-1-methyl-beta-carboline-1,3-dicarboxylic acid	HMDB0035115	Alkaloids and derivatives	Harmala alkaloids	Unclassified	2M+NH4	C14H14N2O4	37.6	0	-4.65034	1.12853	0.0101757	0.0532389	0.619784	1.53665	84415.4	54934.9	117867	90357.3	90377.3	46263.2	91775.9	46979.5	122907	81776	71435.4	33997.6	50395	54190.5	49526.1	52703.7	76963.5	88099.1	63235.2	35970.9	44267.1
9.64_585.4105m/z	585.411	9.64338	pos	Campesteryl glucoside	LMST01031126	Lipids and lipid-like molecules	Sterol Lipids	Sterols	M+Na	C34H58O6	37.6	0	-3.58699	1.98026	0.0467682	0.151944	-9.69011	0.00121056	146.38	120919	3.74188e-07	1185.68	3.74188e-07	3.74188e-07	3.74188e-07	3.74188e-07	3.74188e-07	131.742	3.74188e-07	23558.9	112623	145994	12836	142633	25304.4	76095.7	579713	40580.1	49855.5
9.74_598.3867m/z	598.387	9.73893	pos	PC(22:2(13Z,16Z)/0:0)	LMGP01050135	Lipids and lipid-like molecules	Glycerophospholipids	Glycerophosphocholines	M+Na	C30H58NO7P	37.6	0	4.19886	1.07907	0.000115667	0.00195514	-0.872288	0.54628	28105.1	51448.3	30809.3	42180.1	46596.8	19497.6	15110.8	24202.3	32549.8	25603.4	16396.3	39193.5	55484.5	45942.3	62188.2	48261.9	61801.7	58959.7	35823.9	59203.2	47623.9
9.90_574.3859m/z	574.386	9.90297	pos	PC(O-16:0/4:0)	LMGP01020072	Lipids and lipid-like molecules	Glycerophospholipids	Glycerophosphocholines	M+Na	C28H58NO7P	37.5	0	2.87921	1.14857	3.77269e-05	0.000856265	-1.04505	0.484628	23056.8	47576.3	18804.8	35508.1	38216.9	13473.2	17533.4	31322.1	18479.6	20751.1	13422	34955	46574	41137.6	57142.1	44012.9	62978.5	58421.2	32947.2	48485.1	49109.1
14.03_213.0890m/z	213.089	14.027	neg	N2-Succinyl-L-ornithine	HMDB0001199	Organic acids and derivatives	Carboxylic acids and derivatives	Amino acids, peptides, and analogues	M-H2O-H	C9H16N2O5	37.4	0	3.85792	3.37521	1.04591e-06	6.21675e-05	0.603739	1.51965	555395	365475	439285	445762	503849	578282	646306	605221	550091	582440	647317	393630	367612	388230	348518	385572	337417	340431	390346	355825	347173
8.94_997.6243m/z	997.624	8.93805	pos	PIM1(17:0/18:0)	LMGP15010012	Lipids and lipid-like molecules	Glycerophospholipids	Glycerophosphoinositolglycans	M+H-H2O	C50H95O18P	37.3	0	1.9122	2.36884	0.000120633	0.00201839	-1.00292	0.498989	111243	222938	73896.1	143304	170609	56413.7	73083.4	111254	203241	100932	68456.7	220275	267841	193586	200330	206449	252434	322384	150612	208472	206993
9.05_643.2889m/z	643.289	9.05357	neg	PI(22:6(4Z,7Z,10Z,13Z,16Z,19Z)/0:0)	LMGP06050012	Lipids and lipid-like molecules	Glycerophospholipids	Glycerophosphoinositols	M-H	C31H49O12P	37.3	0	0.0599725	1.34068	6.43527e-05	0.0012891	-1.09073	0.469525	29193.9	62177.6	27071.3	34061.4	38593.9	14626.3	22452.4	42802.8	35023.1	26586.2	21527.9	49571.9	70221.6	57426.6	73436.7	59729.2	50844	98927.9	46703.9	43853	71061.3
3.43_364.0966m/z	364.097	3.42683	pos	Cefadroxil	HMDB0015271	Organoheterocyclic compounds	Lactams	Beta lactams	M+H	C16H17N3O5S	37.2	0	1.1014	1.57897	1.35588e-05	0.000413116	-1.12447	0.45867	35114.1	76556.3	20568.5	39877.9	21456.9	36674.3	41339.5	41990.5	39882	38955.7	35281.5	85529.9	61924.8	79127.9	56428.2	81684.9	70134.1	88147.5	94207.6	42348.1	106030
8.92_979.5769m/z	979.577	8.92212	pos	Erinacine D	HMDB0031896	Lipids and lipid-like molecules	Prenol lipids	Diterpenoids	2M+Na	C27H42O7	37.2	0	1.60494	1.21397	0.000794081	0.00834738	-1.40692	0.377116	20010.3	53061.5	18054.3	28806	42914.7	3642.87	3498.11	9233.41	43337.5	18009.3	12596.7	52113.4	56336.8	46622.6	46051.1	49215.3	66072.4	101971	34126.5	41419.4	36686.7
9.46_610.3726m/z	610.373	9.46047	neg	PC(10:0/10:0)	LMGP01010380	Lipids and lipid-like molecules	Glycerophospholipids	Glycerophosphocholines	M+FA-H	C28H56NO8P	37.2	0	0.106978	1.61105	0.00092279	0.00930036	-0.890225	0.53953	58044.1	107583	46658.4	87628.7	43705.4	29797.1	52133.2	96172.7	70179.4	52908.4	43213.9	58856.1	87247.7	95306.9	98190.4	99867.7	96696.5	148588	117561	107101	166412
10.90_642.3961m/z	642.396	10.9048	neg	1-(2-methoxy-docosanyl)-sn-glycero-3-phosphoserine	LMGP03060021	Lipids and lipid-like molecules	Glycerophospholipids	Glycerophosphoserines	M+FA-H	C29H60NO9P	37.1	0	-4.46479	1.22074	0.000234176	0.00334936	-1.63509	0.32195	13513.7	41974.5	8090.58	34827.3	13912	5636.55	1492.31	18150.4	27351.6	12162.3	3.74188e-07	50112.2	47079.6	37020.8	35299.4	38158.6	47473.7	68588.4	11773.2	34535.4	49703.5
4.98_867.9621m/z	867.962	4.98453	pos	4-Methylnonacosane	HMDB0040908	Hydrocarbons	Alkanes	Acyclic alkanes	2M+Na	C30H62	37	0	3.04309	1.33336	0.00339011	0.0245589	1.62405	3.0824	54147.9	17566.8	101126	17602.3	74047.9	47659.6	40981.2	15925	98522.9	50153.1	41313	1677.33	11079.1	15420.8	46193.6	16227.3	9551.26	28271.4	25380	17837.9	4029.3
8.82_632.3184m/z	632.318	8.82307	neg	OKHdiA-PE	LMGP20020041	Lipids and lipid-like molecules	Glycerophospholipids	Oxidized glycerophospholipids	M-H	C30H52NO11P	37	0	-3.42261	1.00992	0.0137494	0.0657896	-0.411699	0.751738	74519	99129	53464.3	93895	60351.7	63676.5	67336.4	98207.7	97906.5	69328.4	66504.5	94595.7	103027	91575.4	121708	95503.5	98663.9	119150	49266.4	95108	122692
8.71_688.3451m/z	688.345	8.71348	pos	Jubanine C	HMDB0037300	Organic acids and derivatives	Carboxylic acids and derivatives	Amino acids, peptides, and analogues	M+Na	C39H47N5O5	36.7	0	-2.6963	1.22934	3.22918e-06	0.000141918	-1.85367	0.276688	9877.99	35700.9	9338.54	17405.8	16107.6	4831.33	7397.43	5634.46	11923.7	9098.55	7164.46	40480.9	29077.7	33892.8	19837.9	34236.5	35758.6	58738.8	44021.5	26400.4	34563.8
4.86_323.0491m/z	323.049	4.86358	neg	1-Piperazinecarbodithioic acid	HMDB0038379	Organoheterocyclic compounds	Diazinanes	Piperazines	2M-H	C5H10N2S2	36.6	0	-2.10207	1.01815	4.11047e-08	7.35978e-06	-2.12032	0.229996	4915.82	21373.5	7991.46	3799.47	3356.72	4310.51	12136.4	1427.5	3041.31	4482.39	3696.61	15485.9	21936.3	18695.4	18910	20237.1	26410.7	17264	20544.6	25140.8	29110.4
0.83_289.0177m/z	289.018	0.828717	neg	cis-Resveratrol 3-sulfate	HMDB0041712	Phenylpropanoids and polyketides	Stilbenes	Unclassified	M-H2O-H	C14H12O6S	36.5	1.52	0.32628	1.01942	0.0190322	0.0822726	-0.987886	0.504216	28344.9	56215.7	23758.9	26942	19050.1	14586.7	40306	19281.3	27125.1	25845.6	58207.9	55481.9	15075.7	55604.8	38081.9	51674.7	121684	40274.7	67797.4	34064.8	82416.8
10.69_181.0143m/z	181.014	10.6908	pos	3-(but-3-en-1-yn-1-yl)-6-methyl-1,2-dithiine	LMFA12000365	Lipids and lipid-like molecules	Fatty Acyls	Oxygenated hydrocarbons	M+H	C9H8S2	36.5	0.372	1.67398	3.34483	2.57661e-05	0.00064876	0.220204	1.1649	1.41517e+06	1.21485e+06	1.3095e+06	1.34355e+06	1.32333e+06	1.44036e+06	1.50406e+06	1.43219e+06	1.38993e+06	1.45859e+06	1.53505e+06	1.29955e+06	1.27877e+06	1.27502e+06	1.21769e+06	1.27173e+06	1.12869e+06	1.14977e+06	1.25745e+06	1.18203e+06	1.08777e+06
9.24_523.2988m/z	523.299	9.24122	pos	(Z,Z)-2,9,16-Heptadecatriene-4,6-diyn-8-ol	HMDB0032674	Lipids and lipid-like molecules	Fatty Acyls	Fatty alcohols	2M+K	C17H22O	35.9	0.0151	3.07467	1.54843	0.0138133	0.0659525	0.320879	1.24909	318628	255088	350354	392406	361024	249449	201818	341731	378514	300299	292056	225785	277521	238815	219707	246745	277602	310008	200673	255616	298404
8.95_608.3571m/z	608.357	8.95372	neg	PC(18:1(9Z)/2:0)	LMGP01010900	Lipids and lipid-like molecules	Glycerophospholipids	Glycerophosphocholines	M+FA-H	C28H54NO8P	35.7	0	0.426176	1.74767	2.0683e-05	0.000549389	-0.899797	0.535962	61438.3	114632	63958	71005.6	58993.3	56450	62949.2	64695.3	66306	58269.1	50318.6	58913.3	86926.7	111918	130024	111567	101967	126983	147934	129669	140417
10.92_794.5669m/z	794.567	10.9161	pos	PE(22:2(13Z,16Z)/18:3(9Z,12Z,15Z))	HMDB0009557	Lipids and lipid-like molecules	Glycerophospholipids	Glycerophosphoethanolamines	M+H	C45H80NO8P	35.6	0	-3.24381	2.84893	0.0174256	0.0775464	-0.47658	0.718679	518296	721179	350327	410792	283845	528759	726989	823577	464297	517315	558765	912839	973768	716092	767192	737544	594809	870458	480807	544310	613968
4.00_565.5538m/z	565.554	3.99677	pos	DG(16:0e/18:0/0:0)	HMDB0011146	Lipids and lipid-like molecules	Glycerolipids	Diradylglycerols	M+H-H2O	C37H74O4	35.5	0	-2.82646	1.76074	0.0128809	0.0631123	0.65333	1.57279	202125	128513	289256	228137	223510	107175	204780	105012	298274	193966	169013	70009.4	126564	126479	108283	123657	178007	222255	150845	77209	101825
10.66_152.0467m/z	152.047	10.6609	pos	2-Acetylpyrrolidine	HMDB0037293	Organoheterocyclic compounds	Pyrrolidines	Unclassified	M+K	C6H11NO	35.3	0	-4.57487	1.30255	1.01794e-06	6.12157e-05	-0.621442	0.650021	53164.7	81789.2	50483	51570	50173.3	52328.3	57241.9	51937.4	51255.1	54911.5	58581.4	100118	93478	87264.5	85446.1	86199.4	76047	70133.9	82983.4	73011.5	63209.8
6.64_886.5561n	909.545	6.64115	pos	PI(18:1(9Z)/20:3(8Z,11Z,14Z))	HMDB0009843	Lipids and lipid-like molecules	Glycerophospholipids	Glycerophosphoinositols	M+Na, M+K	C47H83O13P	35.1	0	-1.14025	1.36432	0.00100665	0.00993163	1.5298	2.88746	62746.6	21730.7	65992.3	90547.2	90363.9	76602	49114.1	62816.4	21241.7	64095.9	43946.3	1537.49	623.256	18084	1332.05	19877.3	367.174	43758.1	34817.2	28448.9	68461.5
5.67_683.4763m/z	683.476	5.67293	pos	5-Hydroxymethyl tolterodine	HMDB0013973	Benzenoids	Benzene and substituted derivatives	Diphenylmethanes	2M+H	C22H31NO2	34.9	0	-2.79944	1.08192	2.05272e-05	0.000547668	2.42927	5.38622	25217.1	4681.77	12139.4	31767.8	37686.6	21340.9	13895.9	35116.5	38406.6	24672.2	11927.7	586.645	1724.42	4458.33	4229.3	4686.43	6341.13	6715.09	6274.47	4637.06	7164.87
9.60_543.3403m/z	543.34	9.59753	pos	1-(2-methoxy-6Z-heptadecenyl)-sn-glycero-3-phosphoserine	LMGP03060015	Lipids and lipid-like molecules	Glycerophospholipids	Glycerophosphoserines	M+NH4	C24H48NO9P	34.9	0	-0.39769	1.26306	0.0355926	0.126241	-2.81155	0.142442	7848.14	55097.1	17259	9922.96	3196.35	7751.66	10311.9	3971.68	4454.21	8005.48	5760.11	18471.7	8681.94	47624.1	11761	50088.2	49382.3	161388	174329	8681.01	20563.5
5.02_688.3811m/z	688.381	5.02	pos	PHODiA-PC	LMGP20010014	Lipids and lipid-like molecules	Glycerophospholipids	Oxidized glycerophospholipids	M+Na	C32H60NO11P	34.8	0	2.21645	1.27081	0.00752942	0.0429832	1.64934	3.13691	52241.5	16653.8	67231.6	27590.5	65621.3	18255.4	52097.4	12576.5	129379	49701.2	47720.1	1219.05	11469.5	14653	36771.9	15395.3	9193.34	31299.1	32117.7	10094	4325.13
7.31_886.5560n	909.545	7.3079	pos	PI(20:2(11Z,14Z)/18:2(9Z,12Z))	HMDB0009877	Lipids and lipid-like molecules	Glycerophospholipids	Glycerophosphoinositols	M+Na, M+K	C47H83O13P	34.8	0	-1.31512	1.00094	0.000959863	0.00960724	1.50816	2.84446	33996.5	11951.8	38411.8	46578.7	47359.3	37389.7	31172.2	33616.2	13541.8	34264.3	23634.3	236.836	0.465453	9894.38	3.74188e-07	10883.3	3.74188e-07	24785.6	18055.9	15867.8	39794
5.69_759.6401m/z	759.64	5.69057	pos	3-nonadecylphenol	LMPK15010006	Lipids and lipid-like molecules	Polyketides	Phenolic lipids	2M+K	C25H44O	34.7	0	-2.07405	1.17129	5.26371e-05	0.00110959	2.94794	7.71644	27526.9	3567.3	11143.4	30950.2	51910	25017.5	14630.8	33980.7	42422.2	26974.5	10712.5	880.828	3009.3	3330.68	1934.01	3538.5	3671.93	3976.02	4319.04	5029.11	5983.59
8.95_571.3489m/z	571.349	8.95353	pos	LysoPE(0:0/24:6(6Z,9Z,12Z,15Z,18Z,21Z))	HMDB0011499	Lipids and lipid-like molecules	Glycerophospholipids	Glycerophosphoethanolamines	M+NH4	C29H48NO7P	34.2	0	-3.22305	1.20103	0.00287773	0.0217261	-0.437575	0.738374	90118.1	122049	91904.2	125413	118278	64156.6	61322.2	112346	92655	83985.8	61002	122729	133456	113328	153518	117099	108833	134006	109918	109672	117932
3.48_223.0397n	241.074	3.47558	pos	Methyl 4-chloro-1H-indole-3-acetate	HMDB0032937	Organoheterocyclic compounds	Indoles and derivatives	Indolyl carboxylic acids and derivatives	M+H, M+NH4	C11H10ClNO2	34	0.0989	-1.30451	1.17199	5.81726e-06	0.000221438	-0.488206	0.712911	57200.6	80235.3	45968.9	51598.7	49821	61198.3	65910.7	65281	61410.2	58078.3	55538.8	92331.2	83652.4	80297.7	80691	81242.8	69711.3	83187.9	91208.4	66563.9	73466.6
14.42_196.0168m/z	196.017	14.4211	pos	m-Chlorohippuric acid	HMDB0001309	Benzenoids	Benzene and substituted derivatives	Benzoic acids and derivatives	M+H-H2O	C9H8ClNO3	32.8	0	3.60459	5.76483	1.26622e-05	0.000393232	-0.341096	0.789441	2.20552e+06	2.79378e+06	2.1009e+06	2.12911e+06	2.06798e+06	2.2659e+06	2.37698e+06	2.25201e+06	2.10784e+06	2.26678e+06	2.28221e+06	3.25621e+06	3.00019e+06	2.9262e+06	2.92719e+06	2.9166e+06	2.59281e+06	2.51882e+06	2.82258e+06	2.65879e+06	2.3184e+06
14.42_194.0215m/z	194.021	14.4211	pos	2-chloromuconic acid	LMFA01030967	Lipids and lipid-like molecules	Fatty Acyls	Fatty Acids and Conjugates	M+NH4	C6H5ClO4	32.5	0	-0.0659119	1.57293	1.4096e-05	0.000423258	-0.337294	0.791525	167571	211707	156757	163452	159467	171175	176436	167142	163267	172270	178178	247431	228968	222097	218686	221784	195503	191406	214658	200227	176314
14.32_213.9828m/z	213.983	14.3191	pos	Chloroxine	HMDB0015373	Organoheterocyclic compounds	Quinolines and derivatives	Haloquinolines	M+H	C9H5Cl2NO	32.4	11.7	3.16938	1.88279	0.000370601	0.00471476	-0.233006	0.85086	397564	467249	387040	386391	364702	405655	431415	411538	371891	407588	411855	548022	492931	487452	484606	486398	437467	415245	463999	454353	402021
3.43_361.0925n	362.1	3.42683	pos	Methoxyzotepine	3105	Unclassified	Unclassified	Unclassified	M+H-H2O, M+H	C19H20ClNO2S	32	0.659	6.0655	2.96521	1.71901e-05	0.000483097	-1.00395	0.498632	147711	296233	90817.9	145261	105375	138824	191778	161969	186384	163425	145568	310523	253447	306235	243184	314766	249035	331947	378489	172984	401718
5.92_956.1369m/z	956.137	5.92	pos	Punicafolin	HMDB0029950	Phenylpropanoids and polyketides	Tannins	Hydrolyzable tannins	M+NH4	C41H30O26	31.9	0	0.56737	1.00683	0.0227942	0.0929048	-0.742696	0.597621	42254.9	70705.2	23360.6	67183.3	34603.7	33099.8	16830.3	48645.7	80433.4	40368.8	35768.9	34506.9	60798.6	61228.3	89846.4	66589.6	111926	85621.6	20019.7	81126.9	95387.7
9.09_557.3209m/z	557.321	9.08717	neg	29:2(5Z,9Z)(6Br)	LMFA01030891	Lipids and lipid-like molecules	Fatty Acyls	Fatty Acids and Conjugates	M+FA-H	C29H53BrO2	30.7	7.25	-0.347297	1.64877	0.00064111	0.00716787	-0.463433	0.725258	143422	197753	179128	199889	136741	100930	102164	152026	168001	135509	116409	201158	232330	184741	207572	189673	213217	201498	149836	205478	192027
9.97_815.6920m/z	815.692	9.9656	pos	TG(15:0/o-18:0/14:1(9Z))	HMDB0043807	Lipids and lipid-like molecules	Glycerolipids	Triradylcglycerols	M+K	C50H96O5	30.7	0	3.97113	1.17515	6.46141e-05	0.00129255	1.75719	3.3804	37198	11004	33299.8	31620.8	38558.1	38675.5	52255.6	34182	21328.3	37146.5	47715	3.74188e-07	3.74188e-07	9094.23	3.74188e-07	10003.7	3.74188e-07	28023.2	10498.2	18746.7	33674.1

## Sheet: PBA5_Control
ID	m/z	Retention time (min)	Ion mode	Metabolites	Compound ID	Super Class	Class	Sub Class	Adducts	Formula	Score	Fragmentation Score	Mass Error (ppm)	VIP	P-value	adj.P-value	log2(FC)	FC	average(PBA5)	average(Control)	PBA5-1	PBA5-2	PBA5-3	PBA5-4	PBA5-5	PBA5-6	PBA5-7	PBA5-8	PBA5-9	Control-1	Control-2	Control-3	Control-4	Control-5	Control-6	Control-7	Control-8	Control-9	Control-10
8.82_564.3307m/z	564.331	8.82307	neg	LysoPC(18:2(9Z,12Z))	HMDB0010386	Lipids and lipid-like molecules	Glycerophospholipids	Glycerophosphocholines	M+FA-H	C26H50NO7P	59	96.1	0.0415904	6.46217	0.0114783	0.0471718	-0.411218	0.751988	3.29363e+06	4.3799e+06	3.26987e+06	4.8585e+06	2.64432e+06	3.97241e+06	2.99357e+06	4.82696e+06	1.87046e+06	2.96229e+06	2.2443e+06	3.83492e+06	4.47122e+06	4.01662e+06	4.69218e+06	4.2043e+06	4.65863e+06	5.30736e+06	3.38365e+06	4.28107e+06	4.94903e+06
8.95_564.3307m/z	564.331	8.95372	neg	2-linoleoyl-sn-glycero-3-phosphocholine	HMDB0062711	Lipids and lipid-like molecules	Glycerophospholipids	Glycerophosphocholines	M+FA-H	C26H50NO7P	58.8	94.5	-0.0726939	15.6142	0.00112175	0.00837728	-0.316394	0.803075	2.11079e+07	2.62839e+07	2.13785e+07	2.68499e+07	1.88216e+07	2.42055e+07	2.11052e+07	2.58575e+07	1.50263e+07	2.00208e+07	1.67061e+07	2.57295e+07	2.68315e+07	2.50136e+07	2.77547e+07	2.57313e+07	2.65022e+07	2.73337e+07	2.43492e+07	2.55963e+07	2.79973e+07
10.03_568.3620m/z	568.362	10.0333	neg	LysoPC(18:0)	HMDB0010384	Lipids and lipid-like molecules	Glycerophospholipids	Glycerophosphocholines	M+FA-H	C26H54NO7P	58.7	95	0.0823124	16.5	0.000861667	0.00689666	-0.441861	0.736184	1.5137e+07	2.05614e+07	1.48152e+07	1.63606e+07	1.27569e+07	1.70137e+07	1.42882e+07	1.70303e+07	9.62062e+06	1.85708e+07	1.57766e+07	2.06182e+07	2.45464e+07	1.97677e+07	2.25099e+07	1.99078e+07	2.00877e+07	2.44385e+07	1.34397e+07	1.95011e+07	2.0797e+07
8.95_612.3308m/z	612.331	8.95372	neg	LysoPC(22:6(4Z,7Z,10Z,13Z,16Z,19Z))	HMDB0010404	Lipids and lipid-like molecules	Glycerophospholipids	Glycerophosphocholines	M+FA-H	C30H50NO7P	58.7	94.5	0.105963	11.9355	3.52027e-07	1.63636e-05	-0.624434	0.648674	4.15104e+06	6.39927e+06	4.0835e+06	4.24927e+06	5.10783e+06	3.87674e+06	4.37386e+06	4.74598e+06	2.9819e+06	4.21299e+06	3.72726e+06	5.8426e+06	7.17419e+06	6.18503e+06	7.68166e+06	6.28303e+06	5.95128e+06	6.66657e+06	5.76978e+06	6.31853e+06	6.11998e+06
8.99_588.3308m/z	588.331	8.98562	neg	LysoPC(20:4(5Z,8Z,11Z,14Z))	HMDB0010395	Unclassified	Unclassified	Unclassified	M+FA-H	C28H50NO7P	58.2	91.7	0.166618	17.3116	3.36918e-06	9.71435e-05	-0.650385	0.63711	8.63504e+06	1.35534e+07	8.38319e+06	7.48481e+06	1.21091e+07	7.13195e+06	8.02864e+06	1.06591e+07	6.07535e+06	9.17492e+06	8.66829e+06	1.33347e+07	1.45247e+07	1.29391e+07	1.53654e+07	1.32155e+07	1.34589e+07	1.50588e+07	1.0701e+07	1.39591e+07	1.29773e+07
9.09_540.3308m/z	540.331	9.08717	neg	LysoPC(16:0)	HMDB0010382	Lipids and lipid-like molecules	Glycerophospholipids	Glycerophosphocholines	M+FA-H	C24H50NO7P	58.2	92.1	0.253009	10.7675	0.000336657	0.00345544	-0.61871	0.651253	4.26806e+06	6.55361e+06	4.17719e+06	5.94032e+06	3.23489e+06	5.23634e+06	3.89916e+06	5.55736e+06	2.28972e+06	5.09287e+06	2.9847e+06	6.05484e+06	7.57727e+06	6.0411e+06	7.22271e+06	6.23952e+06	7.26789e+06	7.63155e+06	4.48429e+06	6.24485e+06	6.77213e+06
9.21_453.2857n	452.278	9.20877	neg	LysoPE(16:0/0:0)	HMDB0011503	Lipids and lipid-like molecules	Glycerophospholipids	Glycerophosphoethanolamines	M-H, 2M-H	C21H44NO7P	58.2	93.3	0.276365	2.84029	0.0174399	0.0632327	-0.366905	0.775445	753746	972018	727920	974447	504012	893554	707250	854424	429360	1.08579e+06	606950	968777	1.00354e+06	903646	1.04981e+06	919357	1.18645e+06	1.08907e+06	665650	1.01494e+06	918941
9.24_540.3308m/z	540.331	9.24193	neg	LysoPC(0:0/16:0)	HMDB0240262	Lipids and lipid-like molecules	Glycerophospholipids	Glycerophosphocholines	M+FA-H	C24H50NO7P	58.1	92	0.183464	24.4476	3.28195e-06	9.55784e-05	-0.46145	0.726256	2.66461e+07	3.66897e+07	2.66339e+07	3.06595e+07	2.37545e+07	2.84751e+07	2.62643e+07	3.01601e+07	1.9614e+07	3.02694e+07	2.39842e+07	3.72532e+07	4.0027e+07	3.53974e+07	4.00938e+07	3.58276e+07	3.79924e+07	3.77334e+07	3.06422e+07	3.68224e+07	3.51079e+07
9.65_554.3464m/z	554.346	9.64692	neg	LysoPC(17:0)	HMDB0012108	Lipids and lipid-like molecules	Glycerophospholipids	Glycerophosphocholines	M+FA-H	C25H52NO7P	58.1	91.3	0.156172	6.49248	0.00045937	0.00438017	-0.557651	0.679407	1.68826e+06	2.4849e+06	1.70926e+06	2.02617e+06	1.26734e+06	1.42637e+06	1.45392e+06	2.38707e+06	1.09067e+06	2.32769e+06	1.50583e+06	2.14482e+06	2.96912e+06	2.29086e+06	2.7951e+06	2.35379e+06	2.51805e+06	2.80359e+06	1.89964e+06	2.3407e+06	2.73333e+06
8.99_543.3320n	566.321	8.98595	pos	PC(20:4(8Z,11Z,14Z,17Z)/0:0)	LMGP01050140	Lipids and lipid-like molecules	Glycerophospholipids	Glycerophosphocholines	M+Na, M+K	C28H50NO7P	57.9	95.4	-0.857606	2.35172	0.000578807	0.0050999	-0.356715	0.780941	375598	480956	361705	265100	515491	305070	352667	439623	361931	394538	384256	483769	502470	478738	525570	477601	445712	490310	420070	504116	481203
10.00_481.3169n	480.31	9.99977	neg	LysoPE(18:0/0:0)	HMDB0011130	Lipids and lipid-like molecules	Glycerophospholipids	Glycerophosphoethanolamines	M-H, 2M-H	C23H48NO7P	57.8	92.8	0.147889	3.30693	0.00469896	0.024261	-0.502638	0.705815	620668	879363	597260	704856	416995	715741	504475	693387	395935	921541	635821	983933	1.01119e+06	825875	877247	832143	1.12042e+06	1.05377e+06	507663	879536	701853
3.43_204.0898n	205.097	3.42683	pos	L-Tryptophan	33	Organoheterocyclic compounds	Indoles and derivatives	Indolyl carboxylic acids and derivatives	M+H, M+K, M+Na, 2M+Na, 2M+K, 2M+H	C11H12N2O2	57.5	98.5	-0.387031	4.09867	0.0415509	0.118625	0.221384	1.16585	3.36647e+06	2.88757e+06	3.21233e+06	3.57069e+06	2.02128e+06	4.03261e+06	3.46621e+06	3.5713e+06	3.74424e+06	3.00671e+06	3.67286e+06	2.40032e+06	2.90383e+06	2.85449e+06	3.05329e+06	2.76595e+06	2.57118e+06	3.68334e+06	2.8539e+06	2.73997e+06	3.04939e+06
9.46_526.3515m/z	526.352	9.46047	neg	PC(O-16:0/0:0)	LMGP01060010	Lipids and lipid-like molecules	Glycerophospholipids	Glycerophosphocholines	M+FA-H	C24H52NO6P	57.4	92.4	0.165412	2.01221	0.00189698	0.0124126	-0.584165	0.667035	177788	266535	170891	201536	138788	162165	154088	241602	101382	261262	168381	274447	257792	255298	312991	253398	346156	283508	133053	277252	271456
3.46_181.0500m/z	181.05	3.45708	neg	Hydroxyphenyllactic acid	34515	Phenylpropanoids and polyketides	Phenylpropanoic acids	Unclassified	M-H	C9H10O4	57.1	91.6	-3.55331	1.0301	0.00302428	0.0174052	-0.563152	0.676822	53894.9	79629.3	51824.6	72053.3	39896.1	68084.8	57992.1	67531.5	46716.9	45485.7	35468.6	80355	72495.5	79492.7	48641.9	76117.3	96098	97421.2	81484.7	55223.1	108964
8.59_562.3152m/z	562.315	8.59457	neg	LysoPC(18:3(6Z,9Z,12Z))	HMDB0010387	Lipids and lipid-like molecules	Glycerophospholipids	Glycerophosphocholines	M+FA-H	C26H48NO7P	57.1	88.5	0.219865	2.14054	0.0111455	0.0461971	-0.369468	0.774068	398838	515249	392228	595093	371329	485395	377267	522414	234375	367961	243478	493509	511937	462989	592397	492852	503529	548873	438170	548858	559375
7.10_318.3001m/z	318.3	7.09627	pos	17-hydroxy stearic acid	LMFA02000135	Lipids and lipid-like molecules	Fatty Acyls	Octadecanoids	M+NH4	C18H36O3	57	88.4	-0.448351	1.27402	2.41228e-05	0.000460333	-0.410017	0.752614	91236.7	121226	96622.1	99013.1	66626.1	94969.1	92971.7	110563	89195.3	91454.4	79715.4	128377	131765	122583	121532	119146	129250	109764	97938.5	122376	129533
8.82_482.3238m/z	482.324	8.81952	pos	LysoPC(15:0)	HMDB0010381	Lipids and lipid-like molecules	Glycerophospholipids	Glycerophosphocholines	M+H	C23H48NO7P	56.9	87.2	-0.599651	3.13051	0.0114585	0.0471174	-0.433327	0.740552	687449	928293	676582	907026	507767	564785	726847	1.16468e+06	361402	851427	426528	873896	997274	825405	968901	872355	1.0772e+06	1.00151e+06	891747	894308	880324
8.94_502.2923m/z	502.292	8.93805	pos	LysoPE(0:0/20:4(8Z,11Z,14Z,17Z))	HMDB0011488	Lipids and lipid-like molecules	Glycerophospholipids	Glycerophosphoethanolamines	M+H	C25H44NO7P	56.8	87.5	-1.11484	7.13192	0.0108224	0.0452719	-0.502288	0.705986	3.02741e+06	4.2882e+06	2.90227e+06	3.37781e+06	1.86922e+06	2.27499e+06	2.85234e+06	4.46824e+06	1.39742e+06	3.34328e+06	4.76116e+06	4.21085e+06	4.48411e+06	4.05655e+06	4.46463e+06	4.13479e+06	4.91746e+06	6.05176e+06	3.28853e+06	3.96629e+06	3.30707e+06
1.20_136.0757m/z	136.076	1.20457	pos	2-Phenylacetamide	3260	Benzenoids	Benzene and substituted derivatives	Phenylacetamides	M+H	C8H9NO	56.7	84.9	0.208322	1.73784	7.95657e-05	0.0011488	-0.383574	0.766536	190355	248331	183146	174699	179272	177081	195674	208619	183809	178340	232553	233074	231110	241931	206450	236376	279784	309996	249412	248997	246177
4.66_417.1193m/z	417.119	4.65765	neg	Equol 4'-O-glucuronide	HMDB0041731	Phenylpropanoids and polyketides	Isoflavonoids	Isoflavonoid O-glycosides	M-H	C21H22O9	56.7	88.9	0.39296	1.6309	0.00421701	0.0224982	-1.23434	0.425038	51635.4	121484	52296.2	81258.2	38872.3	108564	25291	64490.6	5454.63	63523.9	24967.8	67229.4	87010.5	106854	101424	115916	246609	110867	71066.6	190831	117034
8.94_500.2784m/z	500.278	8.93803	neg	LysoPE(20:4(5Z,8Z,11Z,14Z)/0:0)	HMDB0011517	Lipids and lipid-like molecules	Glycerophospholipids	Glycerophosphoethanolamines	M-H	C25H44NO7P	56.7	86.5	0.299503	6.94034	0.000836355	0.00674244	-0.684286	0.622314	1.61812e+06	2.60017e+06	1.55417e+06	1.83494e+06	993654	1.15174e+06	1.52979e+06	2.39406e+06	753802	1.77553e+06	2.57541e+06	2.47728e+06	2.75374e+06	2.49247e+06	2.59408e+06	2.51924e+06	2.98998e+06	3.57804e+06	2.05968e+06	2.4994e+06	2.03778e+06
10.92_551.3946n	574.384	10.9161	pos	LysoPC(20:0/0:0)	HMDB0010390	Lipids and lipid-like molecules	Glycerophospholipids	Glycerophosphocholines	M+Na, M+K	C28H58NO7P	56.4	87.7	-0.951579	2.50798	0.0453102	0.126105	-1.10164	0.465985	153533	329480	139295	277622	97630.9	57917.1	178298	288321	26850.5	117031	198832	273941	735584	281337	217991	301169	209321	738972	32295	220005	284188
1.20_181.0739n	182.081	1.20457	pos	L-Tyrosine	34	Organic acids and derivatives	Carboxylic acids and derivatives	Amino acids, peptides, and analogues	M+H, M+Na, M+K, 2M+H	C9H11NO3	56.3	91.8	0.285111	5.35849	4.67188e-05	0.000765608	-0.395204	0.760382	1.71718e+06	2.25831e+06	1.65028e+06	1.59482e+06	1.56378e+06	1.5982e+06	1.78968e+06	1.89667e+06	1.64887e+06	1.63641e+06	2.07586e+06	2.21794e+06	2.09729e+06	2.20005e+06	1.86565e+06	2.14808e+06	2.54905e+06	2.79272e+06	2.21008e+06	2.23126e+06	2.27095e+06
3.52_260.1370n	261.144	3.52378	pos	gamma-Glutamylleucine	HMDB0011171	Organic acids and derivatives	Carboxylic acids and derivatives	Amino acids, peptides, and analogues	M+H, M+Na	C11H20N2O5	56.3	85	-0.668067	2.51255	0.00637569	0.0305473	-0.725688	0.604709	261891	433086	250061	263227	235969	296831	267260	402688	159601	243693	237686	332284	353601	391678	284107	406283	776905	603721	298187	487042	397048
4.86_321.0438m/z	321.044	4.86358	neg	[4-(7-hydroxy-3,4-dihydro-2H-1-benzopyran-3-yl)phenyl]oxidanesulfonic acid	HMDB0141213	Phenylpropanoids and polyketides	Isoflavonoids	Isoflavans	M-H	C15H14O6S	56.3	85.8	-0.178362	6.85494	0.000239345	0.00268048	-1.21959	0.429406	727495	1.69419e+06	701478	816272	771374	1.83393e+06	406148	903452	81019.1	583958	449828	1.05823e+06	1.7513e+06	1.47899e+06	1.41897e+06	1.59998e+06	2.17508e+06	1.30051e+06	1.61682e+06	2.14911e+06	2.39294e+06
10.03_508.3406m/z	508.341	10.0333	neg	1-O-(2-methoxy-4Z-hexadecenyl)-sn-glycero-3-phosphocholine	LMGP01060043	Lipids and lipid-like molecules	Glycerophospholipids	Glycerophosphocholines	M-H	C25H52NO7P	56.2	89.6	-0.54445	1.87722	0.00141271	0.00997464	-0.503266	0.705508	167438	237329	164153	189156	136567	170670	148710	204170	92352.7	222270	178891	236796	315314	228393	244350	229225	219443	278830	154398	235015	231533
10.90_552.4021m/z	552.402	10.901	pos	PC(20:0/0:0)	LMGP01050045	Lipids and lipid-like molecules	Glycerophospholipids	Glycerophosphocholines	M+H	C28H58NO7P	56.2	85.2	-0.470024	5.39596	0.00264384	0.0157824	-0.885904	0.541148	731506	1.35177e+06	689024	1.02753e+06	485811	694517	762758	1.25904e+06	277130	763810	623935	1.4503e+06	2.10429e+06	1.20954e+06	1.2674e+06	1.2711e+06	1.22256e+06	1.8433e+06	392280	1.5583e+06	1.19859e+06
6.23_335.0596m/z	335.06	6.22745	neg	{4-[(1E)-3-(4-hydroxy-2-methoxyphenyl)prop-1-en-1-yl]phenyl}oxidanesulfonic acid	HMDB0130353	Unclassified	Unclassified	Unclassified	M-H	C16H16O6S	56.1	85.9	0.349262	2.11615	0.0164035	0.0605936	-0.927623	0.525724	137822	262156	129199	159575	183033	277384	100076	266635	23368.5	60398	40725.6	134169	255250	226356	189967	245280	289086	263230	432082	131421	454715
10.00_481.3165n	482.324	9.99667	pos	PE(18:0/0:0)	LMGP02050001	Lipids and lipid-like molecules	Glycerophospholipids	Glycerophosphoethanolamines	M+H, 2M+H, M+Na, M+H-H2O	C23H48NO7P	55.9	82.6	-0.765651	5.45133	0.002392	0.0146314	-0.557649	0.679408	1.40504e+06	2.06804e+06	1.33804e+06	1.65453e+06	873820	1.54714e+06	1.14418e+06	1.53279e+06	848881	2.1834e+06	1.52259e+06	2.20288e+06	2.29643e+06	1.93014e+06	2.15404e+06	1.95831e+06	2.65954e+06	2.33855e+06	1.23341e+06	2.22796e+06	1.67911e+06
8.92_524.2783m/z	524.278	8.9224	neg	LysoPE(22:6(4Z,7Z,10Z,13Z,16Z,19Z)/0:0)	HMDB0011526	Lipids and lipid-like molecules	Glycerophospholipids	Glycerophosphoethanolamines	M-H	C27H44NO7P	55.9	82	0.104998	8.61544	0.00013265	0.00169202	-0.790984	0.57795	1.87531e+06	3.24476e+06	1.78497e+06	2.14e+06	1.34925e+06	1.33802e+06	1.91474e+06	2.77389e+06	805536	2.31568e+06	2.45568e+06	3.04836e+06	3.48146e+06	3.09236e+06	3.50863e+06	3.11613e+06	3.55142e+06	4.56004e+06	2.48993e+06	3.06907e+06	2.53017e+06
5.05_433.1141m/z	433.114	5.05317	neg	6-{3-[3-(2,5-dihydroxyphenyl)-3-oxopropyl]phenoxy}-3,4,5-trihydroxyoxane-2-carboxylic acid	HMDB0135371	Phenylpropanoids and polyketides	Flavonoids	Flavonoid glycosides	M-H	C21H22O10	55.7	83	0.0742791	1.13036	0.00284302	0.0166326	-1.94169	0.260312	10509.5	40372.7	9867.19	3111.29	435.657	16855.6	5400.71	48729.7	524.353	7525.88	2135.07	7828.73	26939.1	39170.9	52547.4	42675.9	48942.9	49321.7	21322.3	85400	29577.5
9.07_619.2890m/z	619.289	9.07025	neg	1-Arachidonoylglycerophosphoinositol	HMDB0061690	Lipids and lipid-like molecules	Glycerophospholipids	Glycerophosphoinositols	M-H	C29H49O12P	55.7	80.5	0.22394	5.52325	0.00206731	0.0132131	-0.642661	0.64053	1.16415e+06	1.81748e+06	1.15634e+06	1.62551e+06	1.14892e+06	1.36174e+06	1.29878e+06	1.5431e+06	523629	791987	1.02735e+06	1.31487e+06	2.10385e+06	1.68411e+06	1.93144e+06	1.75445e+06	1.56789e+06	2.75799e+06	1.48102e+06	1.47707e+06	2.10212e+06
9.07_620.2958n	603.292	9.07118	pos	PI(20:4(5Z,8Z,11Z,14Z)/0:0)	LMGP06050006	Lipids and lipid-like molecules	Glycerophospholipids	Glycerophosphoinositols	M+H-H2O, M+Na, M+NH4, M+H	C29H49O12P	55.7	81.8	-0.631871	3.85638	0.00160383	0.010977	-0.585565	0.666388	619763	930033	613746	814555	630247	713704	733049	795965	298850	426321	551427	719993	1.10307e+06	862736	1.02877e+06	899158	766846	1.31337e+06	807879	764239	1.03426e+06
2.05_245.1141m/z	245.114	2.04608	neg	gamma-Glutamylvaline	HMDB0011172	Organic acids and derivatives	Carboxylic acids and derivatives	Amino acids, peptides, and analogues	M-H	C10H18N2O5	55.6	82	-0.953972	1.54076	0.00236782	0.0145572	-1.56734	0.337431	30029.6	88994.9	28336.3	29906.6	27064.6	29099.6	31386.4	52151.8	16620.8	34127.7	21573	66853.7	63928.8	79537.7	46463.5	83401.5	204900	125347	31702.1	100494	87321
9.23_504.3085m/z	504.308	9.22518	pos	LysoPE(20:3(11Z,14Z,17Z)/0:0)	HMDB0011514	Lipids and lipid-like molecules	Glycerophospholipids	Glycerophosphoethanolamines	M+H	C25H46NO7P	55.4	85.8	0.0389925	1.47598	0.0395017	0.114566	-0.48311	0.715434	173423	242403	167500	303427	90083.1	174989	196440	302054	72634.3	125299	128382	201957	233662	221302	194221	230577	297096	357744	238583	224092	224795
2.34_328.1389m/z	328.139	2.33875	pos	N-(1-Deoxy-1-fructosyl)phenylalanine	HMDB0037846	Organic acids and derivatives	Carboxylic acids and derivatives	Amino acids, peptides, and analogues	M+H	C15H21NO7	55.3	81.9	-0.542033	1.43409	0.000115769	0.00152359	-0.974427	0.508942	40678.2	79927	40905.6	48419.2	45021.9	50658.9	22357	42921	40549.9	42108	33162.4	76164.7	64136.5	81159.4	56135.2	78732.1	77860.8	96392.7	80451	55871.2	132366
0.78_229.0884n	230.096	0.78185	pos	Ergothioneine	53	Organic acids and derivatives	Carboxylic acids and derivatives	Amino acids, peptides, and analogues	M+H, M+Na, M+K	C9H15N3O2S	55.2	85	-0.236663	1.18499	0.00141906	0.0100101	-1.50178	0.353118	16354.4	46314.2	15686.5	33542.6	14623.5	6665.45	7489.1	9407.51	13245	6980.99	39548.7	87802.7	53538.9	64452.7	16428.9	47131.5	41343	40169.4	28500.8	27308	56466.2
0.75_161.1051n	162.112	0.752683	pos	L-Carnitine	34532	Organic nitrogen compounds	Organonitrogen compounds	Quaternary ammonium salts	M+H, 2M+H	C7H15NO3	55.1	84.2	-0.337414	3.68397	0.0168017	0.0617054	0.397449	1.31718	1.64902e+06	1.25193e+06	1.6061e+06	1.13768e+06	2.50816e+06	1.38919e+06	1.28822e+06	1.67593e+06	1.78723e+06	1.8732e+06	1.57546e+06	1.36922e+06	1.40186e+06	1.22935e+06	1.40743e+06	1.26045e+06	1.20017e+06	1.58412e+06	664145	1.2616e+06	1.141e+06
1.11_233.1130m/z	233.113	1.1106	pos	4-(Glutamylamino) butanoate	HMDB0012161	Organic acids and derivatives	Carboxylic acids and derivatives	Amino acids, peptides, and analogues	M+H	C9H16N2O5	55.1	80.8	-0.877163	1.31245	0.00399116	0.0215904	-2.01277	0.247797	14911.6	60176.7	13806.7	11112.5	19959	11157.1	10326.9	25964.8	11678	23027.8	7171.55	59000.5	42507.4	53319.6	26364.1	56048.8	163622	80655.7	19532.1	56918.7	43799
2.55_310.1164n	311.124	2.54658	pos	gamma-Glutamyltyrosine	HMDB0011741	Organic acids and derivatives	Carboxylic acids and derivatives	Amino acids, peptides, and analogues	M+H, M+Na	C14H18N2O6	55	78.7	-0.270922	1.818	5.74077e-05	0.000895905	-0.854138	0.553196	79783.9	144224	76135.4	78517.6	72702.2	78296.3	87809.7	98133.4	56687.8	80058.6	89714.4	115167	128919	133804	111261	136841	216055	190167	114163	158470	137389
9.24_495.3321n	496.339	9.24122	pos	PC(16:0/0:0)[U] / PC(16:0/0:0)[rac]	182	Unclassified	Unclassified	Unclassified	M+H, M+Na, 2M+H, M+H-H2O	C24H50NO7P	54.8	79.2	-0.834879	43.0827	0.00280627	0.0164708	-0.439681	0.737298	1.15528e+08	1.56691e+08	1.12791e+08	1.5368e+08	8.7557e+07	1.41091e+08	1.0737e+08	1.42651e+08	6.76726e+07	1.4041e+08	8.65311e+07	1.56699e+08	1.80666e+08	1.44185e+08	1.76638e+08	1.4946e+08	1.66909e+08	1.75191e+08	1.10942e+08	1.54941e+08	1.51283e+08
1.20_164.0474n	165.055	1.20457	pos	2-Hydroxycinnamic acid	306	Phenylpropanoids and polyketides	Cinnamic acids and derivatives	Hydroxycinnamic acids and derivatives	M+H, M+H-H2O	C9H8O3	54.7	74.4	0.107902	2.01346	0.000606489	0.00528283	-0.303799	0.810116	362759	447786	348025	345780	326112	337316	366993	401963	345525	349878	443236	424410	421114	435893	369095	426317	500977	553546	447881	449112	449514
0.71_174.1116n	175.119	0.70895	pos	L-Arginine	13	Organic acids and derivatives	Carboxylic acids and derivatives	Amino acids, peptides, and analogues	M+K, M+H	C6H14N4O2	54.4	79.7	-0.558778	2.71528	0.000322675	0.00334521	0.417442	1.33556	569857	426681	555600	533422	506483	533290	562402	475621	668061	541999	751834	492268	364890	417595	385437	414899	415463	374274	413227	505978	482778
1.10_191.0191m/z	191.019	1.09818	neg	3-Oxoglutaric acid	HMDB0013701	Organic acids and derivatives	Keto acids and derivatives	Short-chain keto acids and derivatives	M+FA-H	C5H6O5	54.1	76	-4.08104	3.17572	0.0170925	0.0623316	-0.39268	0.761713	1.00254e+06	1.31617e+06	981088	1.20837e+06	779977	1.27521e+06	1.04761e+06	1.1244e+06	896523	999171	710549	1.36199e+06	1.05789e+06	1.37114e+06	979072	1.29104e+06	1.80486e+06	1.1686e+06	1.11598e+06	1.12123e+06	1.88987e+06
9.24_480.3095m/z	480.309	9.24193	neg	PC(15:0/0:0)	LMGP01050016	Lipids and lipid-like molecules	Glycerophospholipids	Glycerophosphocholines	M-H	C23H48NO7P	54.1	75.8	-0.217938	3.38171	2.00861e-06	6.44487e-05	-0.532455	0.691377	420714	608515	420706	485545	372811	422029	449467	444894	301238	495693	394040	619738	660455	585908	700748	594060	599907	631508	510714	646074	536040
9.76_507.2730m/z	507.273	9.76287	neg	PG(18:2(9Z,12Z)/0:0)	LMGP04050014	Lipids and lipid-like molecules	Glycerophospholipids	Glycerophosphoglycerols	M-H	C24H45O9P	54	79.1	0.336265	1.02359	0.00382733	0.0209306	-0.583158	0.667501	45405	68022.3	44556.9	69161.6	31506.6	46231.9	34121.8	69388.8	16584.1	42666.9	54426.3	54192.2	68228.8	62974.3	63420.2	64633.5	52919.8	93566	80589.7	71070.3	68628.3
0.71_257.1027n	280.092	0.70895	pos	Glycerophosphocholine	HMDB0000086	Lipids and lipid-like molecules	Glycerophospholipids	Glycerophosphocholines	M+Na, M+K, 2M+Na	C8H20NO6P	53.7	71.3	-0.654542	4.74482	0.00628673	0.0302009	0.643198	1.56179	1.55682e+06	996820	1.46252e+06	1.51118e+06	1.29825e+06	1.59005e+06	2.24265e+06	2.06859e+06	1.02101e+06	1.74416e+06	1.073e+06	1.05237e+06	877781	881111	883423	912953	1.00121e+06	1.2005e+06	371873	926428	1.86055e+06
0.83_289.1272n	290.134	0.826717	pos	Ophthalmic acid	HMDB0005765	Organic acids and derivatives	Carboxylic acids and derivatives	Amino acids, peptides, and analogues	M+H, M+Na	C11H19N3O6	53.7	74.1	-0.795607	1.54692	0.0269926	0.0871686	-2.8951	0.134428	12975.1	96520.9	11833.7	7780.17	33513.7	4046.94	4585.61	20261.9	8449.58	21816.8	4487.53	108892	45688.5	83595.7	19611.2	89108.4	374801	93353.6	18480.6	86189.2	45488.3
1.10_288.1201m/z	288.12	1.09818	neg	Prolyl-Gamma-glutamate	HMDB0029031	Organic acids and derivatives	Carboxylic acids and derivatives	Amino acids, peptides, and analogues	M+FA-H	C10H17N3O4	53.5	75.6	0.0677654	1.24347	0.0303783	0.0949723	-3.40407	0.0944655	5771.84	61099.9	5262.78	280.387	15840.9	3.74188e-07	527.017	13737.1	4654.68	11096.7	546.903	61792.9	36859.6	53090.9	13603.5	56656.1	251703	53508.1	4603.54	54517.9	24664
1.43_293.1472n	294.154	1.42827	pos	N-(1-Deoxy-1-fructosyl)leucine	HMDB0037840	Organic acids and derivatives	Carboxylic acids and derivatives	Amino acids, peptides, and analogues	M+H, M+Na, M+H-H2O	C12H23NO7	53.3	70.4	-0.82572	3.24389	6.81314e-05	0.00101449	-0.979473	0.507165	203213	400685	208404	257000	241698	256729	116942	240034	174172	203051	130890	385858	340209	391015	284972	394377	419844	486447	375304	292887	635937
8.48_372.3106m/z	372.311	8.4828	pos	Tetradecanoylcarnitine	HMDB0005066	Lipids and lipid-like molecules	Fatty Acyls	Fatty acid esters	M+H	C21H41NO4	53.1	70.8	-0.623673	1.19995	0.0464966	0.128275	-0.677051	0.625442	71820.8	114832	65588.6	39992.9	116593	114565	63057.3	66397	48736.3	103418	28038.6	117004	108750	106250	121330	108316	78910.4	75840.4	56899	128588	246431
0.84_191.0191m/z	191.019	0.843233	neg	Isocitrate	3328	Organic acids and derivatives	Carboxylic acids and derivatives	Tricarboxylic acids and derivatives	M-H	C6H8O7	53	70.7	-3.2258	2.05912	0.0328689	0.100606	-0.444626	0.734775	407390	554443	396642	553301	288244	571657	389196	456612	338689	412398	259774	581687	397094	564803	414525	536248	799809	495801	437971	450093	866398
0.81_254.9815m/z	254.981	0.814217	neg	Ascorbic acid-2-sulfate	HMDB0060649	Organoheterocyclic compounds	Dihydrofurans	Furanones	M-H	C6H8O9S	52.9	75.2	-0.54162	1.4418	0.00927989	0.0405869	0.509727	1.42378	170760	119934	167792	187436	136746	241147	192739	160091	190787	168298	91803.7	129413	99451.6	116427	87731	114060	79986.7	120161	167545	97101.4	187465
5.87_363.2164m/z	363.216	5.86708	pos	Cortisol	272	Lipids and lipid-like molecules	Steroids and steroid derivatives	Hydroxysteroids	M+H	C21H30O5	52.9	69	-0.425515	1.50459	0.00768056	0.0351392	2.05647	4.15967	71626.5	17219.2	67354.8	57665.5	55301.2	59737.1	197746	70280.7	90806.3	30669.2	15077.4	4393.7	2779.34	15116.8	2789.96	15826.1	5320.27	13683.2	73812.6	5606.92	32863.6
8.09_386.2305n	385.223	8.08943	neg	10,11-dihydro-20-trihydroxy-leukotriene B4	HMDB0012503	Lipids and lipid-like molecules	Fatty Acyls	Eicosanoids	M-H, 2M-H	C20H34O7	52.9	68.5	0.182103	3.1685	0.0014242	0.0100315	-1.84584	0.278194	89920.5	323229	81112.9	114390	227599	81314.6	31444.7	47996.6	45709.4	66985.9	112732	201521	401912	294194	334229	313094	710493	330979	34831	404062	206979
6.96_210.1619n	228.196	6.95862	pos	9-tridecynoic acid	LMFA01030602	Lipids and lipid-like molecules	Fatty Acyls	Fatty Acids and Conjugates	M+H, M+NH4, M+H-H2O	C13H22O2	52.6	65.7	-0.551809	1.8696	0.0144121	0.0549903	0.101017	1.07253	1.48335e+06	1.38304e+06	1.51477e+06	1.35066e+06	1.47246e+06	1.38719e+06	1.49566e+06	1.39251e+06	1.60473e+06	1.57543e+06	1.55675e+06	1.4307e+06	1.47333e+06	1.43429e+06	1.40032e+06	1.436e+06	1.29445e+06	1.34113e+06	1.42113e+06	1.33844e+06	1.26063e+06
9.35_358.3676m/z	358.368	9.35377	pos	Behenic acid	LMFA01010022	Lipids and lipid-like molecules	Fatty Acyls	Fatty Acids and Conjugates	M+NH4	C22H44O2	52.6	69	-1.03406	2.41613	0.0173316	0.0629661	-0.283674	0.821496	683721	832287	703379	629081	701474	649270	658068	656931	753627	668114	733543	764401	965994	859491	703222	848198	696010	1.16459e+06	685643	658237	977081
1.11_279.1316n	280.139	1.1106	pos	N-(1-Deoxy-1-fructosyl)valine	HMDB0037844	Organic acids and derivatives	Carboxylic acids and derivatives	Amino acids, peptides, and analogues	M+H-H2O, M+H	C11H21NO7	52.5	67	-0.602072	2.15861	2.57842e-06	7.80686e-05	-0.940327	0.521115	89698.7	172129	94767.2	127381	86519.2	104074	61960.2	102869	75526.3	86680.6	67510.6	165792	163980	169433	138993	173201	224954	186361	136637	145134	216802
7.30_372.2148n	371.208	7.30408	neg	Blumenol C glucoside	HMDB0040668	Lipids and lipid-like molecules	Fatty Acyls	Fatty acyl glycosides	M-H, 2M-H	C19H32O7	52.4	66.1	0.0159589	2.06776	0.00479502	0.0246691	-2.63332	0.161173	21496.4	133375	19346.8	27162.3	69352.9	18036.9	3391.33	11012.2	2697.74	20032.8	22434.8	46844.7	173021	115760	106395	123449	373917	91440.7	7756.67	205773	89391.9
3.46_784.1499m/z	784.15	3.45708	neg	Flavin adenine dinucleotide (FAD)	2302	Unclassified	Unclassified	Unclassified	M-H	C27H33N9O15P2	52.3	70.1	0.00486737	1.02357	0.000329181	0.00339553	-0.401774	0.756927	65908.8	87074.1	63543	66005.1	61008.1	68385.7	66946.1	60990	62306.8	64468.4	79525.4	72244.5	69790	90209	73499.3	82713.4	88157.9	111391	88852.5	94366.2	99517
9.66_382.2717n	400.306	9.65837	pos	14-F2-dihomo-IsoP	LMFA03110169	Lipids and lipid-like molecules	Fatty Acyls	Eicosanoids	M+NH4, M+K, M+Na, M+H	C22H38O5	52.1	65.7	-0.49924	6.31905	0.0137908	0.0534354	-4.98505	0.0315755	32772	1.03789e+06	32231	46173.5	41412.4	26052.9	20355.4	24637.5	24169.8	21875.9	58039.5	320273	1.21464e+06	1.26875e+06	200984	1.25085e+06	313234	805177	3.92874e+06	472760	603535
3.75_269.0667m/z	269.067	3.75137	neg	Phenol glucuronide	HMDB0060014	Organic oxygen compounds	Organooxygen compounds	Carbohydrates and carbohydrate conjugates	M-H	C12H14O7	52	62.7	-0.0732354	1.26513	0.0139307	0.0537913	-1.59424	0.331197	22908	69167.3	21140.1	36096.1	31218.9	6580.59	20319.4	29621.4	1850	44591.7	14753.7	23647.2	46607.1	59880.3	19812.5	64786.2	179418	65928.5	48023.8	128080	55489.5
3.51_259.1298m/z	259.13	3.50767	neg	Glutamylisoleucine	HMDB0028822	Organic acids and derivatives	Carboxylic acids and derivatives	Amino acids, peptides, and analogues	M-H	C11H20N2O5	51.9	62.8	-0.416313	1.66998	0.00196828	0.0127437	-0.817099	0.567582	88045.7	155124	84359.7	91909.3	75846.8	101446	93096.3	137406	51530.8	79580.7	77235.6	117940	132889	141822	104118	145821	261578	220236	107500	169313	150024
9.07_400.3418m/z	400.342	9.07118	pos	L-Palmitoylcarnitine	HMDB0000222	Lipids and lipid-like molecules	Fatty Acyls	Fatty acid esters	M+H	C23H45NO4	51.8	64.2	-0.771238	4.16776	0.000888554	0.00703038	-1.40837	0.376737	206279	547542	189478	168905	194469	284983	200164	171105	187507	344066	115836	593983	761551	517259	506182	512434	258936	334050	320347	565480	1.1052e+06
10.03_523.3635n	524.371	10.0274	pos	enantio-PAF C-16	43413	Unclassified	Unclassified	Unclassified	M+H, M+K, M+Na, M+H-H2O	C26H54NO7P	51.7	60	-0.494285	34.0893	0.000502562	0.00463797	-0.498735	0.707727	5.51322e+07	7.79003e+07	5.32824e+07	5.81039e+07	4.16142e+07	6.44922e+07	5.24797e+07	6.35827e+07	3.33639e+07	7.10618e+07	5.82087e+07	8.0008e+07	8.8815e+07	7.39151e+07	8.69727e+07	7.49551e+07	7.76316e+07	9.29289e+07	5.124e+07	7.47617e+07	7.77751e+07
3.36_366.1427n	367.15	3.35712	pos	Tetrahydropentoxyline	HMDB0029992	Alkaloids and derivatives	Harmala alkaloids	Unclassified	M+H, M+Na, M+H-H2O	C17H22N2O7	51.7	62.9	0.0835924	1.09214	0.000111363	0.00148492	-0.718302	0.607812	35126.5	57791.7	34915.2	44923.1	28765.3	47839.1	23065.3	37337.4	35160.8	36662.2	27470.1	51840.6	52653	58358.5	51958.1	57958.1	50260.6	78428.2	59677.9	41548.8	75233
3.51_172.9907m/z	172.991	3.50767	neg	Phenol sulphate	HMDB0060015	Organic acids and derivatives	Organic sulfuric acids and derivatives	Arylsulfates	M-H	C6H6O4S	51.5	73.1	-4.0819	2.22681	0.0328523	0.100603	-0.752295	0.593658	215808	363523	202537	346881	233650	98033.4	218155	253304	28025.8	383356	178334	178571	250529	323871	106618	344931	652253	423362	421338	493388	440369
4.67_418.1263n	436.16	4.66678	pos	Equol 7-O-glucuronide	HMDB0041732	Phenylpropanoids and polyketides	Isoflavonoids	Isoflavonoid O-glycosides	M+H, M+NH4, M+H-H2O	C21H22O9	51.3	59.8	-0.260088	1.02652	0.00749148	0.0344698	-1.1113	0.462877	25428.1	54935	25643.5	40394.9	19123	53811.2	12691.9	32880.4	2321.34	29979.8	12007.2	32609.8	39137.4	48027.1	49341.5	52239	111172	46605.8	32690.1	86808	50719.6
9.50_428.3732m/z	428.373	9.49983	pos	Stearoylcarnitine	HMDB0000848	Lipids and lipid-like molecules	Fatty Acyls	Fatty acid esters	M+H	C25H49NO4	51.2	62.8	-0.580263	2.22916	1.80159e-05	0.000363906	-1.22325	0.428316	62405.1	145699	58327.7	58314.3	48828.6	62276.2	46084.2	58693.3	53840.4	122563	52718.6	180126	187556	138607	159965	137759	98457.3	123404	83746.5	158484	188883
1.11_132.0245n	150.058	1.1106	pos	THTC	68817	Unclassified	Unclassified	Unclassified	M+H, M+NH4	C5H8O2S	51	64.7	0.133794	2.20896	0.00585233	0.0287633	-0.278222	0.824607	556549	674926	534779	566930	397432	510186	507420	620535	595140	532777	743739	608216	737622	673141	642090	642471	694757	803858	572070	730516	644520
4.71_956.4845m/z	956.484	4.70987	neg	CDP-DG(16:1(9Z)/18:2(9Z,12Z))	HMDB0115952	Lipids and lipid-like molecules	Glycerophospholipids	CDP-glycerols	M-H2O-H	C46H79N3O15P2	50.2	57.8	3.79033	4.01481	0.00111951	0.00836485	1.99948	3.99856	490736	122728	457749	427328	280011	304659	726653	373486	65372.3	889654	891716	45198	82433.8	111541	319761	114232	131458	175131	66805.9	129925	50797.6
8.97_547.3480m/z	547.348	8.96955	pos	LysoPE(0:0/22:4(7Z,10Z,13Z,16Z))	HMDB0011493	Lipids and lipid-like molecules	Glycerophospholipids	Glycerophosphoethanolamines	M+NH4	C27H48NO7P	50.2	80	-4.99233	1.71236	0.000813807	0.0066144	-0.499264	0.707468	138747	196118	133677	116618	188869	114369	134187	166688	84029	156821	153465	191001	208045	184886	236326	189584	199099	235045	128367	199021	189802
0.63_308.1583n	309.165	0.6342	pos	1-[(5-Amino-5-carboxypentyl)amino]-1-deoxyfructose	HMDB0034879	Organic oxygen compounds	Organooxygen compounds	Carbohydrates and carbohydrate conjugates	M+H-H2O, M+H	C12H24N2O7	50.1	54.6	-0.0430552	1.62178	4.61363e-08	3.46164e-06	-0.959399	0.514271	45409.6	88299	44866.4	61769.9	27669.7	49804.8	32939.6	51610.6	37282	42204.8	60538.6	88489	91840.5	84035.6	88820.6	85821.9	101473	95144.6	74550.9	77266	95547.2
0.00_201.1848m/z	201.185	0.00231667	pos	Lauric acid	357	Lipids and lipid-like molecules	Fatty Acyls	Fatty acids and conjugates	M+H	C12H24O2	49.6	50.6	-0.715317	1.08911	4.7629e-07	2.11076e-05	0.394214	1.31423	80619	61343.3	82723	72635.5	78807.8	74884.9	80634.8	78100.5	94454.2	76652.4	86677.6	60750.6	58525.6	63345.2	63142.9	63619.4	59412.7	56855.9	68562	63416.3	55802.4
11.56_284.2945m/z	284.294	11.5646	pos	Safingol ( L-threo-sphinganine)	LMSP01080055	Lipids and lipid-like molecules	Sphingolipids	Sphingoid bases	M+H-H2O	C18H39NO2	49.2	51.1	-0.968571	1.37273	0.0154157	0.0578757	-0.410577	0.752322	140868	187245	144404	190584	139689	130467	116192	128902	114716	161442	141421	152589	260491	184143	143886	183282	184993	250601	149680	129106	233676
0.71_180.0627n	225.061	0.712017	neg	Allose	HMDB0001151	Organic oxygen compounds	Organooxygen compounds	Carbohydrates and carbohydrate conjugates	M-H, M+FA-H	C6H12O6	48.8	51.3	-3.65066	4.42587	6.0559e-05	0.000928422	-0.489554	0.712245	915141	1.28487e+06	867457	905099	1.01422e+06	1.23358e+06	927126	1.01492e+06	761101	975194	537571	1.35326e+06	1.38242e+06	1.238e+06	1.20958e+06	1.26101e+06	1.36488e+06	1.36009e+06	1.27745e+06	1.04035e+06	1.36164e+06
1.17_343.1266n	344.134	1.17263	pos	N-(1-Deoxy-1-fructosyl)tyrosine	HMDB0037845	Organic acids and derivatives	Carboxylic acids and derivatives	Amino acids, peptides, and analogues	M+H-H2O, M+H	C15H21NO8	48.8	50.4	-0.440929	1.67808	3.62387e-07	1.66848e-05	-1.34712	0.393076	30506.7	77610.1	30980.5	34362.7	38787.2	34491.2	24075.1	35171.2	26215.6	27149.4	23327.1	67251.8	62262.1	75830.7	56781.1	76828.9	89615.8	91919.3	75667.8	66455.2	113488
9.19_426.3574m/z	426.357	9.19202	pos	Elaidic carnitine	HMDB0006464	Lipids and lipid-like molecules	Fatty Acyls	Fatty acid esters	M+H	C25H47NO4	48.6	49.3	-1.01051	3.21426	0.00847589	0.0378699	-1.44066	0.368398	137069	372067	124867	51204	132632	180138	115067	124018	168918	298040	38734.5	367921	586412	338828	366619	345427	96131.4	140375	253185	341139	884633
8.87_448.3417m/z	448.342	8.87003	pos	Vaccenyl carnitine	HMDB0006351	Lipids and lipid-like molecules	Fatty Acyls	Fatty acid esters	M+Na	C25H47NO4	47.9	47.6	4.60106	1.35156	0.0315526	0.097842	-2.52344	0.173928	10353.5	59527.3	9329.4	114.411	821.97	12447.8	9091.95	3691.12	36924.6	20560.8	199.318	20155.1	144200	52135.2	25799.4	54429.7	534.936	1740.36	76919.2	31512.1	187848
9.60_690.4547n	708.489	9.59753	pos	Butyl 4'-O-butanoyl-6-O-hexadecanoyl-neohesperidoside	LMSL05000005	Lipids and lipid-like molecules	Saccharolipids	Other acyl sugars	M+NH4, M+K, M+Na, M+H	C36H66O12	47.8	41.1	-1.02446	16.37	0.0487167	0.132808	-7.00386	0.00779162	64384.3	8.26328e+06	58583.3	137770	112154	45084.4	5868.19	3093.82	2373.57	2316.2	212215	1.437e+06	5.95531e+06	1.0106e+07	1.22554e+06	9.86214e+06	1.95593e+06	5.83395e+06	3.98289e+07	2.85394e+06	3.57408e+06
0.00_163.0968m/z	163.097	0.00231667	pos	Dimethicone	89344	Unclassified	Unclassified	Unclassified	M+H	C6H18OSi2	47	46.7	-0.47377	2.55406	0.000113186	0.00150317	0.314107	1.24324	620843	499374	636613	531994	627733	562415	612041	594819	735901	585532	700540	570137	482888	517312	530979	517115	482472	443451	521453	489496	438439
8.59_260.2140n	278.248	8.58933	pos	6-[5]-ladderane-1-hexanol	LMFA05000063	Lipids and lipid-like molecules	Fatty Acyls	Fatty alcohols	M+H, M+NH4, M+H-H2O	C18H28O	47	38.4	-0.0611366	1.03378	0.018082	0.0649277	-0.477006	0.718467	77095	107305	88733.6	70445.8	72778.6	68141.1	67720.2	81735.1	80383.2	83041.6	80875.5	78419.6	77719.2	112823	104748	117080	120827	95618.4	77048.2	97126.5	191638
0.53_124.0871m/z	124.087	0.531983	pos	L-Histidinol	HMDB0003431	Organic nitrogen compounds	Organonitrogen compounds	Amines	M+H-H2O	C6H11N3O	46.8	36.8	1.11568	1.32705	0.000461283	0.00438728	0.221793	1.16618	265636	227782	268687	253130	239558	261054	267156	253488	265021	300264	282364	213583	258716	237308	231150	237692	209818	208200	253370	230985	197003
10.69_256.2632m/z	256.263	10.6908	pos	Palmitic amide	HMDB0012273	Lipids and lipid-like molecules	Fatty Acyls	Fatty amides	M+H	C16H33NO	46.8	38.2	-1.15341	2.63893	0.0429657	0.121303	-0.236384	0.848871	1.09107e+06	1.28532e+06	1.11891e+06	1.24756e+06	1.09032e+06	909292	1.04513e+06	1.03709e+06	993623	1.23811e+06	1.13961e+06	1.19486e+06	1.45924e+06	1.29311e+06	1.08482e+06	1.2801e+06	1.23926e+06	1.7178e+06	1.09976e+06	901446	1.58281e+06
4.45_843.4006m/z	843.401	4.45095	neg	Blasticidin S	HMDB0030452	Organooxygen compounds	Carbohydrates and carbohydrate conjugates	Sugar acids and derivatives	2M-H	C17H26N8O5	46.6	55.3	3.14434	2.7591	0.000714967	0.00599665	1.60454	3.04099	253213	83266.6	240458	380779	133245	117366	408156	226381	71391.2	398996	302142	78973.5	81169.3	78525.3	144317	79194.4	83229.9	80886.1	55213	103797	47360.1
9.68_311.1687m/z	311.169	9.6792	neg	N-Undecylbenzenesulfonic acid	HMDB0032549	Benzenoids	Benzene and substituted derivatives	Benzenesulfonic acids and derivatives	M-H	C17H28O3S	46.4	39.5	0.19225	2.76996	0.0424429	0.120281	-0.285205	0.820625	1.04591e+06	1.27452e+06	1.07503e+06	1.10709e+06	980130	1.00834e+06	970797	989845	1.11878e+06	1.00104e+06	1.16211e+06	1.1522e+06	1.12255e+06	1.30347e+06	1.04564e+06	1.29989e+06	1.03474e+06	1.5828e+06	1.98781e+06	994139	1.22201e+06
14.03_191.0569m/z	191.057	14.027	neg	D-altro-D-manno-Heptose	HMDB0029952	Organic oxygen compounds	Organooxygen compounds	Carbohydrates and carbohydrate conjugates	M-H2O-H	C7H14O7	46.3	41.7	3.66304	3.0402	1.97138e-10	6.64904e-08	0.617966	1.53471	407051	265230	418517	363845	417602	385591	417696	393845	461979	397218	407168	267975	271047	283905	253423	281211	238023	257087	297893	256587	245149
0.76_195.0504m/z	195.05	0.755683	neg	D-Ribose	HMDB0000283	Organic oxygen compounds	Organooxygen compounds	Carbohydrates and carbohydrate conjugates	M+FA-H	C5H10O5	46.2	39.5	-3.99468	2.4479	0.000623741	0.00540067	-1.19621	0.436422	104574	239617	100653	92096.8	108677	118895	88562.4	155065	83602.6	121691	71922.8	198407	170276	242332	132695	242103	455540	230339	147065	267819	309591
10.06_616.4181n	634.452	10.0582	pos	Nonoxynol-9	HMDB0015680	Organic oxygen compounds	Organooxygen compounds	Ethers	M+NH4, M+Na, M+H	C33H60O10	45.4	36	-0.844786	4.28658	0.0283607	0.0902007	-0.178222	0.883792	3.93111e+06	4.44801e+06	4.0265e+06	3.51317e+06	3.95926e+06	3.74204e+06	3.83382e+06	3.84354e+06	4.3398e+06	4.06914e+06	4.05275e+06	4.49324e+06	4.26645e+06	4.68033e+06	4.409e+06	4.67528e+06	3.97665e+06	4.05601e+06	5.94678e+06	4.23568e+06	3.74066e+06
8.87_619.2891m/z	619.289	8.87128	neg	1-arachidonoyl-sn-glycero-3-phospho-1D-myo-inositol	HMDB0062722	Lipids and lipid-like molecules	Glycerophospholipids	Glycerophosphoinositols	M-H	C29H49O12P	45	33.9	0.351369	1.51913	0.00242996	0.0148199	-0.543504	0.686103	107331	156436	107797	134432	136127	112965	123362	124071	51973.8	66407.4	108847	115776	179956	150319	168815	152729	128408	218552	128317	143451	178041
8.87_424.3418m/z	424.342	8.87003	pos	Butenylcarnitine	HMDB0013126	Organic acids and derivatives	Hydroxy acids and derivatives	Beta hydroxy acids and derivatives	M+H-H2O	C25H47NO5	44.9	31.1	-0.853135	2.23896	0.0189151	0.0671216	-1.59737	0.330479	60928.1	184363	55005.7	9054.75	38431.8	66520.8	50652.3	43716.6	120622	151825	12524.2	134011	352740	164081	157894	170031	18975.5	39764.8	150477	183378	472279
0.95_269.0878m/z	269.088	0.94975	neg	D-erythro-L-galacto-Nonulose	HMDB0029955	Organooxygen compounds	Carbohydrates and carbohydrate conjugates	Glycosyl compounds	M-H	C9H18O9	44.8	28	-0.0863149	1.3249	0.0300366	0.0941412	-0.290413	0.817668	230835	282309	218254	276414	205700	318338	243347	265382	176261	238969	134846	299718	302012	268571	258123	270615	262561	324094	276510	209180	351702
14.19_136.1121m/z	136.112	14.1933	pos	4-Ethyl-2-methyl-5-propyloxazole	HMDB0037873	Organoheterocyclic compounds	Azoles	Oxazoles	M+H-H2O	C9H15NO	44.7	25.3	-0.152287	1.521	0.00519892	0.0261714	0.138882	1.10105	615595	559097	631136	559562	636895	576539	599366	588583	678554	614128	655588	601377	568186	583238	580109	582175	520496	515690	598047	551377	490273
14.18_150.1277m/z	150.128	14.1759	pos	5-Butyl-4-ethyl-2-methyloxazole	HMDB0037885	Organoheterocyclic compounds	Azoles	Oxazoles	M+H-H2O	C10H17NO	44.3	23.9	-0.355038	1.49997	0.00559897	0.0277329	0.137891	1.1003	608709	553223	623636	553704	628682	572075	589965	580331	670045	609778	650165	594623	561217	577426	570910	576411	512523	508031	592575	552995	485520
3.43_187.0633n	188.071	3.42683	pos	Indoleacrylic acid	HMDB0000734	Organoheterocyclic compounds	Indoles and derivatives	Indoles	M+H, M+H-H2O	C11H9NO2	44.1	32.9	-0.368348	3.90311	0.0124797	0.050012	0.26332	1.20024	2.21329e+06	1.84404e+06	2.11949e+06	2.37203e+06	1.38646e+06	2.62643e+06	2.25638e+06	2.36439e+06	2.4239e+06	2.00421e+06	2.36632e+06	1.53503e+06	1.85334e+06	1.8232e+06	1.95489e+06	1.77044e+06	1.70498e+06	2.3216e+06	1.77909e+06	1.75609e+06	1.94175e+06
0.71_161.1051n	184.094	0.70895	pos	Malonyl-Carnitin	HMDB0062496	Organic nitrogen compounds	Organonitrogen compounds	Quaternary ammonium salts	M+Na, M+K	C7H15NO3	44	24.4	-0.43739	1.27752	0.000211582	0.00242767	1.5698	2.96864	51089.3	17209.6	49089.1	23692.7	53670.2	40486.9	42635.3	75907.2	54332.2	91690.8	28298.9	21448.8	19015.3	14742.8	25277.8	15713.3	10158	15065.2	2423.72	25397.8	22853.7
0.75_117.0789n	257.147	0.752683	pos	Betaine	HMDB0000043	Organic acids and derivatives	Carboxylic acids and derivatives	Amino acids, peptides, and analogues	M+Na, 2M+Na, 2M+H	C5H11NO2	43.8	20.8	-0.434379	5.74963	1.28697e-05	0.000275294	1.6903	3.22723	801661	248405	858286	1.16323e+06	572758	923881	1.07609e+06	894379	809494	564740	352098	420506	111592	213594	208300	229981	471991	131696	218877	318310	159206
0.78_143.0946n	144.102	0.78185	pos	L-2-Amino-3-methylenehexanoic acid	HMDB0030410	Organic acids and derivatives	Carboxylic acids and derivatives	Amino acids, peptides, and analogues	M+H, M+Na	C7H13NO2	43.7	20.9	-0.11415	1.28866	0.000547662	0.00491506	0.631276	1.54893	91146.6	58844.7	91421.9	111015	73284.1	100836	110836	101580	105472	71903.1	53970.7	61016.1	52472.8	55740.4	63930.7	58448.3	56067.2	46257.1	84843.7	39856.8	69814.1
3.42_360.0856m/z	360.086	3.4227	neg	S-Lactoylglutathione	HMDB0001066	Organic acids and derivatives	Carboxylic acids and derivatives	Amino acids, peptides, and analogues	M-H2O-H	C13H21N3O8S	43.4	29.5	-3.87776	1.37898	0.000447354	0.00429668	-0.848827	0.555236	46420.2	83604.5	48619.7	50390.6	69017.9	55834.2	18528	36806.2	44482.3	54120.2	39982.7	80154.1	72336.8	85873.7	64594.7	87501.6	67047.6	101711	107301	48455.1	121069
6.34_469.1105m/z	469.111	6.34127	pos	3,6,7-Trihydroxy-4'-methoxyflavone 7-rhamnoside	HMDB0041455	Phenylpropanoids and polyketides	Flavonoids	Flavonoid glycosides	M+Na	C22H22O10	41.9	12.1	0.0497178	1.2091	2.26576e-08	2.00368e-06	-0.554263	0.681005	48550.9	71293.1	49176.8	48590.1	51012.6	48266.3	45214.3	57851.9	42902.2	51072.7	42871.6	71504.1	77596.6	66591	82758.5	70308.6	70095.6	70735.1	69763.9	70331.7	63245.8
10.47_223.2055m/z	223.205	10.4743	pos	Nerolidol	90926	Lipids and lipid-like molecules	Prenol lipids	Sesquiterpenoids	M+H	C15H26O	41.8	13.2	-0.85381	1.32237	0.0011771	0.00866575	0.184351	1.13631	336935	296518	345400	305243	359493	281835	324661	332836	366927	348332	367687	300677	305985	311961	299877	310372	270149	285816	309025	295117	276199
13.56_131.0354m/z	131.035	13.5634	neg	(S)-2-Acetolactate	HMDB0006855	Organic acids and derivatives	Keto acids and derivatives	Short-chain keto acids and derivatives	M-H	C5H8O4	41.5	12.6	2.80397	6.64365	5.69793e-08	3.87968e-06	0.318776	1.24727	3.61276e+06	2.89653e+06	3.72849e+06	3.45924e+06	3.76603e+06	3.37058e+06	3.49997e+06	3.49679e+06	3.80233e+06	3.64724e+06	3.74414e+06	3.18256e+06	2.98081e+06	3.04332e+06	2.88224e+06	3.02163e+06	2.82456e+06	2.60289e+06	2.92575e+06	2.88088e+06	2.62064e+06
15.76_166.0482n	149.045	15.7591	pos	L-Lyxonate	HMDB0060255	Organic oxygen compounds	Organooxygen compounds	Carbohydrates and carbohydrate conjugates	M+H-H2O, M+H	C5H10O6	41.4	18.7	2.68624	1.75129	8.87473e-05	0.00124599	-0.806689	0.571693	73308.7	128231	73170	42416.8	68482.2	67453.2	69071.7	41545.6	70066.9	154682	72890.3	137081	124050	135344	135019	134672	122764	120634	135068	126563	111114
0.00_131.0887m/z	131.089	0.00231667	pos	3-Methylcyclohexanethiol	87746	Organosulfur compounds	Thiols	Alkylthiols	M+H	C7H14S	41.3	16.1	-1.23807	1.67281	4.22027e-08	3.23844e-06	0.659244	1.57925	121515	76944.6	123790	98580.6	120525	111117	119798	114930	141567	120871	142458	85702.7	73014.4	80088.7	81988.5	80110.2	72677.7	67457.7	80753.8	77656.3	69995.6
4.65_614.3458m/z	614.346	4.64908	pos	Gravelliferone	HMDB0030729	Phenylpropanoids and polyketides	Coumarins and derivatives	Hydroxycoumarins	2M+NH4	C19H22O3	41.1	15.2	-2.99599	4.32203	0.0302054	0.0945494	1.76407	3.39656	822313	242102	776740	301650	599889	791808	690201	397692	80582.4	1.13563e+06	2.62663e+06	31349.6	135158	209538	795294	223625	125046	339774	256363	252609	52262.2
15.97_271.2631m/z	271.263	15.9704	pos	2,6-Dimethyl-5-heptenyl octanoate	97290	Lipids and lipid-like molecules	Fatty Acyls	Fatty esters	M+H	C17H34O2	41	7.95	-0.367308	1.8357	6.52887e-05	0.000980148	-0.804667	0.572494	79068.5	138112	79445.2	45930	69230.8	71430.8	77449.3	49814.2	69172.8	165626	83517.7	141333	140031	143352	141263	143542	126486	127362	142723	145041	129989
0.71_156.0420m/z	156.042	0.70895	pos	5-amino-pentanoic acid	LMFA01100040	Lipids and lipid-like molecules	Fatty Acyls	Fatty Acids and Conjugates	M+K	C5H11NO2	40.9	11	-0.76945	2.42435	6.53989e-07	2.73337e-05	2.14253	4.41537	122321	27703.4	119463	132378	80473.8	155192	171444	140192	133955	114148	53640.9	55630.3	15768.9	23422.1	24009.6	25228.2	30975.1	14231.2	15102.7	47009.2	25656.7
0.00_270.2557n	271.263	0.00231667	pos	Isopropyl tetradecanoate	HMDB0040392	Lipids and lipid-like molecules	Fatty Acyls	Fatty acid esters	M+H-H2O, M+H	C17H34O2	40.8	7.41	-0.612692	1.07563	4.43706e-05	0.000738814	0.282322	1.21615	119505	98265.1	121958	109546	113311	105860	118143	122093	136732	113287	134616	99801.1	95988.7	102631	99792.7	102295	91294.4	88076.6	108074	101305	93391.6
14.03_157.0511m/z	157.051	14.027	neg	2-(Methoxymethyl)furan	HMDB0034247	Organoheterocyclic compounds	Heteroaromatic compounds	Unclassified	M+FA-H	C6H8O2	40.6	12	4.52099	4.04317	7.48501e-13	1.43456e-09	0.689527	1.61275	645956	400530	664922	581789	671084	616037	643806	637979	693690	640496	663803	423448	397942	426072	385321	422709	375156	368685	429828	396314	379823
14.04_159.0304m/z	159.03	14.0432	neg	Galactonolactone	HMDB0002541	Organoheterocyclic compounds	Lactones	Unclassified	M-H2O-H	C6H10O6	40.6	13.9	2.87821	1.24438	5.56511e-09	7.35057e-07	0.387055	1.30772	105235	80472.1	108843	100777	111038	97909.1	100020	106424	109061	107072	105974	86580.2	82215.9	85179.5	80097.8	84250.8	75714.9	73063.8	87218.8	77075.1	73324.6
0.74_177.1346m/z	177.135	0.737967	pos	Dimethylurea	HMDB0029198	Organic acids and derivatives	Organic carbonic acids and derivatives	Ureas	2M+H	C3H8N2O	40.3	4.48	-0.0326632	4.06938	9.35507e-05	0.00129834	-4.55903	0.0424225	13643.5	321610	12888.7	43121	24118.7	12450.5	1812.57	339.822	1192.88	2.11251	26865.5	140802	359478	316518	431760	335097	269854	286580	755659	203442	116913
1.10_381.0300m/z	381.03	1.09818	neg	hesperetin 3'-O-sulfate	HMDB0029202	Phenylpropanoids and polyketides	Flavonoids	O-methylated flavonoids	M-H	C16H14O9S	40.3	21.7	3.6486	1.2907	0.0022289	0.0139371	-0.421501	0.746647	119490	160036	112485	146790	100782	140697	132281	120472	116491	128769	76644.8	204319	147049	152667	151470	154222	207192	120953	155853	139200	167432
1.11_229.1546m/z	229.155	1.1106	pos	Isoproterenol	HMDB0015197	Benzenoids	Phenols	Benzenediols	M+NH4	C11H17NO3	40.3	4.64	-0.445624	1.53417	0.0158061	0.0588992	0.508754	1.42282	217851	153112	207714	293463	114948	279539	178902	265969	162803	273014	184308	143138	121740	154573	101498	145273	121831	183399	119910	221054	218707
3.42_423.0813m/z	423.081	3.4227	neg	N-phosphocreatinate(2-)	HMDB0062567	Unclassified	Unclassified	Unclassified	2M-H	C4H11N3O5P+	40.3	13.5	3.2111	1.09269	0.00188939	0.0123766	-0.868367	0.547766	30892.7	56397.6	30972.9	36025.4	35477.8	40373.5	14461.6	25027.3	29675.7	36048.5	29971.6	44237.7	50072.1	54900.1	39330	55170.8	44870	77083.6	75806.8	30052.8	92451.9
9.09_608.3185m/z	608.318	9.08717	neg	OOB-PE	LMGP20020034	Lipids and lipid-like molecules	Glycerophospholipids	Oxidized glycerophospholipids	M+FA-H	C27H50NO9P	40.1	13.3	-3.63799	1.25113	0.00631792	0.0303407	-0.40462	0.755435	114913	152116	113032	162117	85465.1	136938	100087	130470	68756.1	144359	92996.7	136443	168153	143911	175381	146844	165122	176163	106579	153611	148948
0.48_166.0482n	149.045	0.479183	pos	L-Xylonate	HMDB0060256	Organic oxygen compounds	Organooxygen compounds	Carbohydrates and carbohydrate conjugates	M+H-H2O, M+H	C5H10O6	40	11.8	2.52409	2.89881	6.56464e-05	0.000983543	0.262906	1.19989	948918	790835	972578	836164	961540	876288	932026	926271	1.05771e+06	924281	1.0534e+06	867084	803308	825467	828010	822386	722005	730810	837696	781080	690504
1.10_314.0500n	359.048	1.09818	neg	5'-Phosphoribosyl-N-formylglycinamide	HMDB0001308	Nucleosides, nucleotides, and analogues	Glycinamide ribonucleotides	Unclassified	M-H, M+FA-H	C8H15N2O9P	40	8.3	-4.98266	1.38356	0.0334719	0.101864	-0.431829	0.741322	202468	273118	190688	242038	154050	338073	239313	216464	149652	179191	112743	297273	217390	265694	205643	264158	420231	256933	244209	214568	345076
0.81_323.0247m/z	323.025	0.814217	neg	4-Hydroxy-2-oxoglutaric acid	HMDB0002070	Organic acids and derivatives	Keto acids and derivatives	Gamma-keto acids and derivatives	2M-H	C5H6O6	39.9	5.45	-2.66728	1.28763	0.0133808	0.0523924	-0.689509	0.620065	76802.8	123863	72986.7	79029.9	80742	118543	129070	67397	52887	54181.4	36389	135535	85106.1	119429	68838.8	116761	147832	120780	171593	72411.4	200340
10.07_572.3920n	590.426	10.0732	pos	IC202A	LMFA08020182	Lipids and lipid-like molecules	Fatty Acyls	Fatty amides	M+NH4, M+Na, M+K, M+H	C27H52N6O7	39.9	9.61	4.01494	4.18563	0.0331205	0.101113	-0.15233	0.899796	4.53056e+06	5.0351e+06	4.62819e+06	4.0709e+06	4.48999e+06	4.37411e+06	4.45892e+06	4.42159e+06	4.97251e+06	4.67404e+06	4.68482e+06	5.12871e+06	4.88658e+06	5.27562e+06	5.00466e+06	5.27514e+06	4.50622e+06	4.64762e+06	6.50683e+06	4.79852e+06	4.32111e+06
14.03_113.0482n	225.089	14.027	neg	1-Pyrroline-2-carboxylic acid	HMDB0006875	Organoheterocyclic compounds	Pyrrolines	Unclassified	M+FA-H, 2M-H	C5H7NO2	39.9	13.4	4.3758	4.99115	5.44252e-14	4.7276e-10	0.908712	1.87737	795704	423840	819382	708669	825806	765671	792092	772746	867669	785811	823487	436455	425801	452686	405584	447618	377793	399751	460512	419508	412692
0.72_244.0791m/z	244.079	0.723467	pos	N-Acetylgalactosamine	HMDB0000212	Organic oxygen compounds	Organooxygen compounds	Carbohydrates and carbohydrate conjugates	M+Na	C8H15NO6	39.3	0	-0.395539	1.17031	0.00618775	0.0298937	-0.372767	0.7723	119596	154857	113776	122362	130933	163881	116991	124576	112098	124509	67237.5	196392	155343	144183	165406	149646	171860	167853	124569	111522	161792
0.75_279.1913m/z	279.191	0.752683	pos	hydroxyisovaleroyl carnitine	HMDB0062555	Lipids and lipid-like molecules	Fatty Acyls	Fatty acid esters	M+NH4	C12H23NO5	39.2	0	-0.511775	1.78521	1.22709e-06	4.3942e-05	1.04576	2.06446	100533	48697	108064	102589	121437	84565.6	106081	103152	104128	94813.8	79964.8	54785.1	29464.7	45157.2	38663.7	46140.6	83414.3	42784.9	35803.2	75022.3	35734
10.03_310.1617m/z	310.162	10.0274	pos	Histidinyl-Histidine	HMDB0028887	Organic acids and derivatives	Carboxylic acids and derivatives	Amino acids, peptides, and analogues	M+NH4	C12H16N6O3	39.2	0	-1.83808	1.23702	0.000384313	0.00382319	0.409906	1.3286	131410	98908.8	127588	146530	107798	140182	133255	144204	94781.1	148943	139410	84818.7	104196	93691.2	105317	95489.9	87007	109830	78366.4	108110	122262
14.04_172.0622m/z	172.062	14.0432	neg	N-Acetyl-L-glutamate 5-semialdehyde	HMDB0006488	Organic acids and derivatives	Carboxylic acids and derivatives	Amino acids, peptides, and analogues	M-H	C7H11NO4	39.2	4.95	3.81474	3.44724	1.08459e-13	4.7276e-10	0.817772	1.76268	408913	231983	422339	378416	414885	388674	409605	403654	447896	405320	409427	258249	234051	246457	217068	244701	222123	214154	246768	226663	209599
4.12_329.1641n	659.336	4.11908	pos	(S)-Reticuline	HMDB0003601	Organoheterocyclic compounds	Isoquinolines and derivatives	Benzylisoquinolines	2M+H, 2M+K, 2M+Na, M+H	C19H23NO4	39.2	9.73	4.32178	2.37639	0.000111397	0.00148492	2.13541	4.39361	148931	33897.2	142085	216957	66948.5	43825.7	200091	167577	69990.9	244662	188245	36971.5	42102	31841.8	28582.7	32144.9	41632.6	43407.3	23900.7	30236.1	28152.8
10.69_297.2898m/z	297.29	10.6908	pos	Linoleamide	HMDB0062656	Lipids and lipid-like molecules	Fatty Acyls	Fatty amides	M+NH4	C18H33NO	39	0	-0.75868	2.49234	2.27543e-06	7.09689e-05	-0.903529	0.534578	118302	221300	122000	135601	118233	99639.2	114947	116536	101643	138819	117297	221005	257982	223818	181661	220623	224307	291170	184631	147049	260749
10.72_237.2211m/z	237.221	10.72	pos	cis-9-palmitoleic acid	LMFA01030056	Lipids and lipid-like molecules	Fatty Acyls	Fatty Acids and Conjugates	M+H-H2O	C16H30O2	39	0	-0.936373	1.13513	2.36241e-05	0.000452005	0.213316	1.15935	175795	151633	178925	172436	181726	156544	174316	180813	187493	168706	181198	167231	157135	158857	148241	156824	137621	148923	155932	140657	144906
12.57_186.1025m/z	186.102	12.5659	pos	Beta-Carboline	HMDB0012897	Organoheterocyclic compounds	Indoles and derivatives	Pyridoindoles	M+NH4	C11H8N2	39	0	-0.492959	1.52817	0.000101742	0.00139073	0.271931	1.20742	265522	219908	272778	270274	288243	245710	253013	243421	270791	265428	280035	256680	253063	225730	219659	225466	215646	197798	210138	214952	179945
10.31_510.3917m/z	510.392	10.3052	pos	LysoPC(O-18:0)	HMDB0011149	Lipids and lipid-like molecules	Glycerophospholipids	Glycerophosphocholines	M+H	C26H56NO6P	38.9	0	-0.177922	1.47943	0.0226652	0.0764582	-0.472913	0.720508	155593	215948	150000	188093	92429.6	155762	157033	235100	82264.6	210888	128763	203997	207855	199341	217406	202233	252184	312946	100107	211195	252219
0.48_205.1074m/z	205.107	0.479183	pos	2-hydroxy-7-methyl-Octanedioic acid	LMFA01170136	Lipids and lipid-like molecules	Fatty Acyls	Fatty Acids and Conjugates	M+H	C9H16O5	38.8	0	1.54163	1.15797	1.32637e-10	5.29996e-08	0.730424	1.65913	51858.4	31256.4	53025.7	45180.6	51239.4	48164.3	49806.3	49946.7	57278.2	52736.9	59347	32963	30481	32531.6	31827.1	32491.5	28554.7	29437.9	33740.7	31472	29064.4
14.03_147.0667m/z	147.067	14.027	neg	Propionic acid	LMFA01010003	Lipids and lipid-like molecules	Fatty Acyls	Fatty Acids and Conjugates	2M-H	C3H6O2	38.8	0	3.05019	2.10083	3.44623e-11	2.49903e-08	0.606351	1.5224	195443	128378	201440	171970	200971	188534	199119	193110	214316	191316	198209	135534	132153	137100	123101	135901	117932	122927	136794	124835	117500
14.03_175.0619m/z	175.062	14.027	neg	(-)-Bornesitol	HMDB0031437	Organooxygen compounds	Alcohols and polyols	Cyclic alcohols and derivatives	M-H2O-H	C7H14O6	38.8	0	3.50542	1.15955	1.10704e-08	1.23503e-06	0.379215	1.30063	92191.5	70882	94704.3	83613.9	93280.4	90822.2	91401.7	91897.8	97882.4	92357.3	93763.6	76488.9	71783.4	75650.9	68848.6	74873.5	65322.5	65693.7	77280.7	69396.7	63481
9.64_338.2454n	356.279	9.64338	pos	(+/-)14,15-DiHETrE	LMFA03050010	Lipids and lipid-like molecules	Fatty Acyls	Eicosanoids	M+NH4, M+Na	C20H34O4	38.8	0	-1.01372	2.80565	0.00387284	0.0210761	-5.88684	0.0168999	2998.46	177424	2866.84	5236	5016.6	2551	1529.12	1200.56	1508.94	822.886	6254.17	63717.7	250336	221077	34992.2	215160	60476.3	154203	567374	89450.6	117458
4.70_480.2552m/z	480.255	4.70215	pos	Suberylglycine	HMDB0000953	Organic acids and derivatives	Carboxylic acids and derivatives	Amino acids, peptides, and analogues	2M+NH4	C10H17NO5	38.7	0	0.0983125	1.53455	0.00109081	0.00820116	2.17595	4.51884	68903.3	15248	64408.1	57962.1	34520.4	39171.1	106391	54152.4	9885.38	126393	127246	5883.9	10037.9	13706.4	42559.1	14254.6	15807.8	20407.9	8779.33	15483.6	5559.53
8.33_195.0890n	194.082	8.33247	neg	2-Phenyl-1,3-propanediol monocarbamate	HMDB0060351	Benzenoids	Benzene and substituted derivatives	Unclassified	M-H, 2M-H	C10H13NO3	38.7	0	-3.01951	1.56236	4.85646e-06	0.000127828	0.277555	1.21214	246049	202987	251631	224567	241512	231195	235533	229562	262810	269540	268089	209683	198047	215973	204730	214258	193571	187288	214619	202729	188974
8.36_445.2461n	446.253	8.3604	pos	Mivacurium Metabolite (Isoquinolinium, 1,2,3,4-tetrahydro-2-(3-hydroxypropyl)-6,7-dimethoxy-2-methyl	1328	Unclassified	Unclassified	Unclassified	M+H, M+NH4	C25H35NO6	38.7	0.0284	-0.667041	2.09838	0.0133604	0.0523918	-0.420404	0.747215	338671	453245	330813	237031	511457	265348	344038	366707	416347	261138	315162	573451	336464	445514	473206	459581	387274	361768	591065	550403	353720
8.95_504.3095m/z	504.309	8.95372	neg	LysoPE(20:2(11Z,14Z)/0:0)	HMDB0011513	Lipids and lipid-like molecules	Glycerophospholipids	Glycerophosphoethanolamines	M-H	C25H48NO7P	38.7	1.23	-0.126372	2.30705	2.47624e-05	0.000471298	-0.475676	0.71913	247365	343978	252400	307617	185300	306180	236406	304097	170008	251445	212831	350505	340081	326445	342108	334424	346962	343136	336132	346072	373916
0.74_292.1977m/z	292.198	0.737967	pos	Glutaminyllysine	HMDB0028802	Organic acids and derivatives	Carboxylic acids and derivatives	Amino acids, peptides, and analogues	M+NH4	C11H22N4O4	38.6	0	-0.890202	2.18942	1.15114e-08	1.26477e-06	2.32598	5.01405	91319.8	18212.8	90108.4	106447	59088.5	100157	116877	82839.9	109944	78607.4	77809.9	37887.6	5218.25	15392.1	11768.7	16557.1	27351	5767.69	3668.7	35102.8	23413.7
0.86_132.0246n	150.058	0.857333	pos	3-methyl sulfolene	96259	Organoheterocyclic compounds	Dihydrothiophenes	Unclassified	M+H, M+NH4	C5H8O2S	38.6	2.32	0.576252	1.29011	0.00264768	0.0157892	-0.367289	0.775238	132985	171541	126792	135545	91978.7	130125	117520	154843	128818	117728	193513	153303	168694	174127	158350	163074	180627	207300	140483	189660	179790
14.42_211.0038m/z	211.004	14.4211	pos	Benzyl sulfate	HMDB0034782	Benzenoids	Benzene and substituted derivatives	Unclassified	M+Na	C7H8O4S	38.6	0	1.16611	1.59403	0.000180949	0.0021617	-0.274087	0.826974	233119	281894	239286	213666	239191	220357	226271	223531	259888	229958	245920	330485	297929	295472	292321	294583	263138	255797	288445	268687	232081
9.23_534.2958m/z	534.296	9.22518	pos	PC(O-14:0/2:0)	LMGP01020019	Lipids and lipid-like molecules	Glycerophospholipids	Glycerophosphocholines	M+K	C24H50NO7P	38.6	0	0.300204	1.34746	1.20384e-06	4.33234e-05	-0.195202	0.873451	206020	235869	210065	206088	199158	210542	200332	200989	198126	209617	219260	253645	234313	237020	235185	239667	222829	241206	245844	219179	229799
9.87_523.3647n	562.327	9.87177	pos	PC(O-16:0/2:0)	LMGP01020046	Lipids and lipid-like molecules	Glycerophospholipids	Glycerophosphocholines	M+H-H2O, M+K	C26H54NO7P	38.6	0	1.64502	1.13924	0.0024448	0.0148916	-0.664415	0.630944	47684.2	75575.9	44813.3	47537	27553.3	67831.2	49762.4	57698.7	21880.3	65932.5	46149.3	70414.5	99601.8	71058.3	87262.6	72174.7	67554	102927	38180.4	68665.1	77920.5
8.73_664.3456m/z	664.346	8.73123	pos	OHOHA-PS	LMGP20040027	Lipids and lipid-like molecules	Glycerophospholipids	Oxidized glycerophospholipids	M+H	C31H54NO12P	38.5	0	-0.0815601	1.11215	5.5799e-05	0.000880098	-1.28372	0.410736	15792.5	38449.2	15052.8	19937.2	9958.44	13759.9	11869.8	24427.8	7589.35	17212.2	22324.8	44895.8	30819.1	36116.6	23313.5	36744.8	39718.8	64734.9	42940.4	26220.1	38988.6
0.00_369.3514m/z	369.351	0.00231667	pos	Cholesterol	LMST01010001	Lipids and lipid-like molecules	Sterol Lipids	Sterols	M+H-H2O	C27H46O	38.4	0	-0.364866	1.14374	1.08729e-06	4.05371e-05	1.5968	3.02473	31838.4	10526	33153.7	15566.1	25160.4	34032.3	32074.4	36736.1	41912.3	37939.1	29971.2	8496.14	725.57	10642.7	12142.3	10805.4	13099.1	5690	15583.8	15964.1	12111.4
11.01_577.4106n	578.418	11.0084	pos	LysoPC(22:1(13Z))	HMDB0010399	Unclassified	Unclassified	Unclassified	M+H, M+Na	C30H60NO7P	38.4	0	-0.203814	1.89901	0.00105017	0.00799506	-0.867366	0.548147	89553.1	163374	84101.3	157815	72831	68017.2	85214.6	119218	49834.8	99177.6	69768.2	151140	240558	145262	156237	152103	191170	227790	75612.4	152473	141398
11.71_161.0825m/z	161.082	11.7086	neg	2-(1-Ethoxyethoxy)propanoic acid	HMDB0059918	Organic acids and derivatives	Carboxylic acids and derivatives	Carboxylic acids	M-H	C7H14O4	38.4	0	3.24239	1.11298	2.12038e-10	6.83374e-08	0.703129	1.62803	49139.9	30183.6	51218.5	41863.9	48349.8	45463.4	52473.8	49906.6	52430.1	48304.4	52249	32400	27964.4	32438.9	29803.2	32014.1	28340.3	24681	32864.3	30340.9	30989.2
10.66_207.0174m/z	207.017	10.6609	pos	2-Pyrroloylglycine	HMDB0059778	Organic acids and derivatives	Carboxylic acids and derivatives	Amino acids, peptides, and analogues	M+K	C7H8N2O3	38.3	0	4.27467	4.01812	4.63358e-10	1.28772e-07	0.625169	1.54239	710233	460475	723294	626849	733407	637363	693467	694963	813475	713677	755597	467090	452665	481956	458271	482333	432746	433852	495353	476406	424075
8.99_528.3095m/z	528.309	8.98562	neg	PE(22:4(7Z,10Z,13Z,16Z)/0:0)	LMGP02050014	Lipids and lipid-like molecules	Glycerophospholipids	Glycerophosphoethanolamines	M-H	C27H48NO7P	38.3	9.25	-0.17956	1.46521	0.000658099	0.00560447	-0.682316	0.623164	69830.6	112058	66985.8	36005.9	113743	45640.6	59442.7	111963	50934.9	81388.3	62372.1	123693	131348	106336	121797	108338	125568	103175	98915	121539	79874.8
10.89_323.3056m/z	323.306	10.8858	pos	Clavepictine B	LMSP01080053	Lipids and lipid-like molecules	Sphingolipids	Sphingoid bases	M+NH4	C20H35NO	38.2	0	-0.246493	1.04688	3.62765e-06	0.000102399	-1.0976	0.467292	16544.9	35405.9	17927.8	16027.5	16524.1	13408.5	17646.4	15752.1	18151.9	18814.6	14651.1	28567.9	37035	36005.1	27964.1	36452.2	39941.3	41554.9	26876.2	26916.6	52745.7
11.36_175.0619m/z	175.062	11.3584	neg	2-Isopropylmalic acid	HMDB0000402	Lipids and lipid-like molecules	Fatty Acyls	Fatty acids and conjugates	M-H	C7H12O5	38.2	0	3.93202	1.19491	2.31426e-10	7.14123e-08	0.489873	1.40432	76496.6	54472.3	78710.4	67771.1	78488.8	72613.4	75628.2	77190.4	83112.4	75313.2	79641	55023.8	54530	58020.1	51764.6	57250.6	49676	51431.6	55311.7	57104.4	54609.9
14.29_887.5639m/z	887.564	14.2901	pos	PI(16:0/22:4(7Z,10Z,13Z,16Z))	HMDB0009794	Lipids and lipid-like molecules	Glycerophospholipids	Glycerophosphoinositols	M+H	C47H83O13P	38.2	0	-0.622559	2.24469	0.0417563	0.119073	0.826194	1.773	336026	189524	342186	399182	526739	314083	245139	350431	376728	134533	335217	949.123	1868.5	156911	3.74188e-07	172602	279059	172675	188372	479356	443448
9.24_296.1461m/z	296.146	9.24122	pos	Dothiepin	2429	Unclassified	Unclassified	Unclassified	M+H	C19H21NS	38.2	0.158	-2.07194	1.95239	9.34851e-08	5.6967e-06	0.516001	1.42999	204572	143059	204975	214798	183850	236569	218633	205417	172356	218467	186086	137133	158946	137267	131028	140408	148386	148234	137832	143051	148304
3.20_367.0871n	368.094	3.19872	pos	Zeanoside B	93479	Unclassified	Unclassified	Unclassified	M+H, M+Na	C16H17NO9	38.1	8.9	-8.67233	2.13061	0.00357654	0.0197907	-2.15072	0.2252	33194.6	147401	30046.8	46984.8	40555.3	11717	18249.8	85153	6024.91	39310	20710	115521	195449	139374	67188.7	144237	379486	201969	17033.1	123263	90484.6
0.00_223.0635m/z	223.063	0.00231667	pos	Benzidine	HMDB0041835	Benzenoids	Benzene and substituted derivatives	Biphenyls and derivatives	M+K	C12H12N2	38	0	1.59406	1.03209	2.51998e-08	2.17543e-06	0.533245	1.44718	54250.8	37487.3	55307.7	47756.5	54387.1	49583.2	56309.4	52577.2	62966.8	51207.4	58162.2	41506.6	36604.5	39032.3	39119.4	39034	36069.6	33527.5	39672.2	37553	32753.7
10.71_813.6822m/z	813.682	10.7054	pos	SM(d18:1/24:1(15Z))	HMDB0012107	Lipids and lipid-like molecules	Sphingolipids	Phosphosphingolipids	M+H	C47H93N2O6P	38	0	-2.662	10.796	0.00705333	0.0329769	0.992062	1.98903	5.42509e+06	2.72751e+06	5.90681e+06	6.55396e+06	6.78091e+06	6.61774e+06	5.20168e+06	4.19925e+06	6.88043e+06	3.49591e+06	3.18911e+06	3.74188e-07	3.74188e-07	2.25707e+06	11306.1	2.48278e+06	3.03254e+06	6.03145e+06	3.19565e+06	5.09209e+06	5.17222e+06
5.90_913.2120m/z	913.212	5.90237	pos	Flavin Mononucleotide	HMDB0001520	Nucleosides, nucleotides, and analogues	Flavin nucleotides	Unclassified	2M+H	C17H21N4O9P	38	0	-4.88857	1.13857	0.000475739	0.0044611	0.689641	1.61288	70663.9	43812.1	72722.2	66534.9	53712	63395.7	95941.1	99450.7	49084.3	54279.8	80854	36281.5	42769.1	40372.2	39776	41422.4	35024.8	51944.8	58300.8	47619.6	44610.1
14.04_163.0618m/z	163.062	14.0432	neg	Mannitol	HMDB0000765	Organic oxygen compounds	Organooxygen compounds	Carbohydrates and carbohydrate conjugates	M-H2O-H	C6H14O6	37.8	0	3.18978	1.17504	5.48118e-10	1.42384e-07	0.514752	1.42875	71545.7	50075.8	73694.8	64203.3	75153.3	67697.1	73181.6	70430.3	73944.7	71836.9	73769.7	57023.3	48530.4	53368	48050.6	52933.7	46321	48023.8	53650.7	48108.1	44748.6
14.08_229.0840m/z	229.084	14.0752	neg	1-Isothiocyanatobutane	HMDB0031328	Organosulfur compounds	Isothiocyanates	Unclassified	2M-H	C5H9NS	37.8	0	0.662276	1.0099	1.38676e-08	1.44692e-06	0.731135	1.65994	41462.4	24978.2	42500.3	33533.7	48045.2	34992	41601.4	45935.3	42920.7	40795.8	42837	25958.8	24067.5	26970.7	21303.2	26684.6	22395	24420.2	27776	23537.1	26668.7
14.28_205.0171m/z	205.017	14.2755	pos	O-methoxycatechol-O-sulphate	HMDB0060013	Organic acids and derivatives	Organic sulfuric acids and derivatives	Arylsulfates	M+H	C7H8O5S	37.8	0.169	2.85082	2.09418	0.00198983	0.0128374	-0.252183	0.839625	498023	593150	515841	453168	512590	467860	485494	497106	555826	475612	518712	728723	644160	621109	623339	619339	533339	517742	606971	556318	480458
10.03_640.2927m/z	640.293	10.0333	neg	S-(9-deoxy-delta9,12-PGD2)-glutathione	HMDB0013058	Organic acids and derivatives	Carboxylic acids and derivatives	Amino acids, peptides, and analogues	M-H	C30H47N3O10S	37.7	0.0468	2.67256	1.45724	0.017965	0.0646255	-0.195093	0.873517	349605	400227	349398	413062	340796	329951	314960	362200	268998	389381	377699	434216	462480	398295	424262	394665	370114	425079	324403	353150	415606
10.12_442.3523m/z	442.352	10.1171	pos	Hydroxybutyrylcarnitine	HMDB0013127	Organic acids and derivatives	Hydroxy acids and derivatives	Beta hydroxy acids and derivatives	M+H	C25H47NO5	37.6	0	-0.965959	1.12778	1.29798e-06	4.56907e-05	0.643017	1.56159	62227	39848.5	63759.4	59246.4	72203.9	46142.3	63836.8	61093	67672.8	55478	70610.7	37559	47017	41749.1	36132.6	42250.3	30891.3	39104.2	43942.7	34185	45653.8
14.04_161.0825m/z	161.082	14.0432	neg	Methyl (S)-2-Methylbutanoate	LMFA07010934	Lipids and lipid-like molecules	Fatty Acyls	Fatty esters	M+FA-H	C6H12O2	37.6	0	4.46139	1.25946	5.4097e-10	1.42384e-07	0.571481	1.48605	75680	50927	77980.2	68210.3	76766.5	70094	78114.9	72525.3	85194.1	76954.4	75280.1	52549	53391.3	54602.2	50270.6	53913.2	44285.2	50285.5	54784.9	48366	46821.8
9.64_585.4105m/z	585.411	9.64338	pos	Campesteryl glucoside	LMST01031126	Lipids and lipid-like molecules	Sterol Lipids	Sterols	M+Na	C34H58O6	37.6	0	-3.58699	1.9981	0.046968	0.129231	-8.80925	0.00222921	269.554	120919	242.599	964.059	395.19	3.74188e-07	3.74188e-07	3.74188e-07	3.74188e-07	3.74188e-07	824.14	23558.9	112623	145994	12836	142633	25304.4	76095.7	579713	40580.1	49855.5
9.74_598.3867m/z	598.387	9.73893	pos	PC(22:2(13Z,16Z)/0:0)	LMGP01050135	Lipids and lipid-like molecules	Glycerophospholipids	Glycerophosphocholines	M+Na	C30H58NO7P	37.6	0	4.19886	1.1038	0.000104766	0.00141738	-0.859065	0.55131	28363.9	51448.3	26725.1	35197.4	21455.4	30299.4	29824.9	49073.5	12512.4	31893.7	18293.5	39193.5	55484.5	45942.3	62188.2	48261.9	61801.7	58959.7	35823.9	59203.2	47623.9
10.12_600.4025m/z	600.403	10.1171	pos	PC(22:1(13Z)/0:0)	LMGP01050141	Lipids and lipid-like molecules	Glycerophospholipids	Glycerophosphocholines	M+Na	C30H60NO7P	37.5	0	4.44128	1.06375	0.00119116	0.00874706	-0.967613	0.511351	25527.8	49922.3	23185.6	29114.9	21690.9	23698.1	23615.4	44006.9	8458.15	36499	19481.5	37735.8	53982.7	44578.5	69574.7	45987.6	72223.1	66635.2	19716.7	44930.9	43857.7
14.03_213.0890m/z	213.089	14.027	neg	N2-Succinyl-L-ornithine	HMDB0001199	Organic acids and derivatives	Carboxylic acids and derivatives	Amino acids, peptides, and analogues	M-H2O-H	C9H16N2O5	37.4	0	3.85792	4.10205	1.25237e-13	4.7276e-10	0.756529	1.68942	617442	365475	636868	556813	646818	594599	619300	605427	654142	616126	626882	393630	367612	388230	348518	385572	337417	340431	390346	355825	347173
8.94_578.3927m/z	578.393	8.93805	pos	C-6 NBD-dihydro-Ceramide	44979	Unclassified	Unclassified	Unclassified	M+H	C30H51N5O6	37.4	0.0208	2.65914	1.24075	0.0199365	0.0697731	0.198315	1.14736	318309	277428	333526	316502	300689	335099	311673	271375	372893	301031	321990	308964	269717	296621	256039	294962	243473	233790	361267	273823	235620
3.43_364.0966m/z	364.097	3.42683	pos	Cefadroxil	HMDB0015271	Organoheterocyclic compounds	Lactams	Beta lactams	M+H	C16H17N3O5S	37.2	0	1.1014	1.25896	0.000564509	0.00501045	-0.789298	0.578626	44297.4	76556.3	46581	46055.1	63436.1	56297.1	19502.3	32667.6	48318.9	51186.3	34632.5	85529.9	61924.8	79127.9	56428.2	81684.9	70134.1	88147.5	94207.6	42348.1	106030
9.88_640.2927m/z	640.293	9.882	neg	S-(PGA2)-glutathione	HMDB0013062	Organic acids and derivatives	Carboxylic acids and derivatives	Amino acids, peptides, and analogues	M-H	C30H47N3O10S	37.1	0	2.69019	1.0365	0.00797324	0.0361588	-0.511461	0.701512	59009.3	84117.4	56608.4	78367.5	47115.7	63085.4	53383	79019.6	29081.1	69804.3	54619	83010.7	110082	78848	92077.6	79678.3	83119.7	109763	41770.7	67852.4	94971.6
9.23_949.6245m/z	949.625	9.22518	pos	di-trans,poly-cis-undecaprenyl diphosphate	LMPR03030008	Lipids and lipid-like molecules	Prenol lipids	Polyprenols	M+Na	C55H92O7P2	36.8	1.25	3.75653	2.32268	0.00421756	0.0224982	-0.591666	0.663576	250685	377779	238435	352650	149888	325742	228600	307468	104769	365752	182858	399237	423992	333758	418544	349766	484367	446817	218808	364858	337638
14.14_550.2951m/z	550.295	14.1408	pos	3-hydroxy-estra-1,3,5(10),6,8-pentaen-17-one	LMST02010007	Lipids and lipid-like molecules	Sterol Lipids	Steroids	2M+NH4	C18H18O2	36.7	0	-0.103328	1.04075	1.17783e-06	4.25988e-05	0.416017	1.33424	73605	55166.3	75828.4	64463	70999.5	69458.8	68985.4	70595.7	82703.3	80909.4	78501.1	65895.3	52091.6	56706	58491	56892.4	49761.5	53838.8	54327.1	54256.5	49402.5
8.71_688.3451m/z	688.345	8.71348	pos	Jubanine C	HMDB0037300	Organic acids and derivatives	Carboxylic acids and derivatives	Amino acids, peptides, and analogues	M+Na	C39H47N5O5	36.7	0	-2.6963	1.09505	4.50611e-05	0.000745178	-1.33478	0.396454	14153.7	35700.9	13238.3	15371.6	10585.2	11414.9	9842.04	25115.2	6100.19	19089	16627.3	40480.9	29077.7	33892.8	19837.9	34236.5	35758.6	58738.8	44021.5	26400.4	34563.8
1.20_559.1862n	582.175	1.20457	pos	Neoacrimarine K	HMDB0033192	Phenylpropanoids and polyketides	Coumarins and derivatives	Furanocoumarins	M+Na, M+K, M+H-H2O	C31H29NO9	36.6	0	3.57879	1.069	6.68258e-05	0.00099812	-1.00215	0.499254	21707.3	43479.5	20131.9	23025.9	18073.5	16254.6	21339.4	23930.6	15131	18898.7	38580.4	38051.7	35238.1	42163.4	34803.2	40263.2	56602.4	66639	43561.8	44435.5	33036.9
10.69_181.0143m/z	181.014	10.6908	pos	3-(but-3-en-1-yn-1-yl)-6-methyl-1,2-dithiine	LMFA12000365	Lipids and lipid-like molecules	Fatty Acyls	Oxygenated hydrocarbons	M+H	C9H8S2	36.5	0.372	1.67398	3.80524	1.39545e-05	0.000295478	0.281044	1.21507	1.47613e+06	1.21485e+06	1.50772e+06	1.35605e+06	1.55096e+06	1.32107e+06	1.44802e+06	1.40284e+06	1.67375e+06	1.4407e+06	1.58406e+06	1.29955e+06	1.27877e+06	1.27502e+06	1.21769e+06	1.27173e+06	1.12869e+06	1.14977e+06	1.25745e+06	1.18203e+06	1.08777e+06
5.90_913.4627m/z	913.463	5.90237	pos	PA(20:5(5Z,8Z,11Z,14Z,17Z)/0:0)	LMGP10050033	Lipids and lipid-like molecules	Glycerophospholipids	Glycerophosphates	2M+H	C23H37O7P	36.5	0	-0.00663917	1.12879	0.000347792	0.00354465	0.718398	1.64535	66864.7	40638.5	69031.8	57243.7	51249.2	66069.3	84725.1	97061.6	43655	57787.2	74959	32400	42086.9	36897.8	32530.5	38649.8	30239.1	47010.5	53048.7	47165.5	46355.8
0.78_383.1535m/z	383.154	0.78185	pos	2-Methoxyestradiol-17beta 3-sulfate	LMST05020007	Lipids and lipid-like molecules	Sterol Lipids	Steroid conjugates	M+H	C19H26O6S	36.4	0	3.28113	1.24978	6.96453e-07	2.88407e-05	1.65282	3.14448	37203	11831.2	33920.5	35836.6	28442.9	43043.5	50780.6	46997	27577.4	33495.7	34733	20584.3	7036.13	10281.4	11559.6	10775	16381.5	6124.06	331.962	20736.9	14501.2
9.24_523.2988m/z	523.299	9.24122	pos	(Z,Z)-2,9,16-Heptadecatriene-4,6-diyn-8-ol	HMDB0032674	Lipids and lipid-like molecules	Fatty Acyls	Fatty alcohols	2M+K	C17H22O	35.9	0.0151	3.07467	1.2096	0.0421433	0.119843	0.237415	1.17888	300717	255088	297085	365095	247326	374229	300430	302802	203341	334609	281539	225785	277521	238815	219707	246745	277602	310008	200673	255616	298404
4.00_565.5538m/z	565.554	3.99677	pos	DG(16:0e/18:0/0:0)	HMDB0011146	Lipids and lipid-like molecules	Glycerolipids	Diradylglycerols	M+H-H2O	C37H74O4	35.5	0	-2.82646	1.41026	0.0359874	0.107194	0.570146	1.48467	190800	128513	181977	142660	136434	140532	213499	213291	112949	226791	349068	70009.4	126564	126479	108283	123657	178007	222255	150845	77209	101825
10.66_152.0467m/z	152.047	10.6609	pos	2-Acetylpyrrolidine	HMDB0037293	Organoheterocyclic compounds	Pyrrolidines	Unclassified	M+K	C6H11NO	35.3	0	-4.57487	1.31897	1.98293e-06	6.37659e-05	-0.639181	0.642077	52515	81789.2	53442.2	45772.9	56958	46992.8	50373.8	47802.8	64004.4	51887.6	55400.2	100118	93478	87264.5	85446.1	86199.4	76047	70133.9	82983.4	73011.5	63209.8
9.84_748.5270m/z	748.527	9.83927	pos	PC(15:0/20:5(5Z,8Z,11Z,14Z,17Z))	HMDB0007951	Lipids and lipid-like molecules	Glycerophospholipids	Glycerophosphocholines	M+H-H2O	C43H76NO8P	35.3	0	-0.750537	1.0522	0.00471589	0.024331	-1.09607	0.46779	22983	49131.1	23165.8	25374.3	618.415	18037.8	29845.5	24264.4	23381.6	20139.7	42019.7	99454.7	57065.5	46496.7	66219.2	50826.2	41260.5	24100.8	31251.6	43624.8	31010.5
6.64_886.5561n	909.545	6.64115	pos	PI(18:1(9Z)/20:3(8Z,11Z,14Z))	HMDB0009843	Lipids and lipid-like molecules	Glycerophospholipids	Glycerophosphoinositols	M+Na, M+K	C47H83O13P	35.1	0	-1.14025	1.54871	0.000195142	0.00227503	1.64568	3.12896	67994.5	21730.7	72890.4	59584.8	75376.2	90995.4	80685.3	54432.2	85384.3	66574.1	26028.1	1537.49	623.256	18084	1332.05	19877.3	367.174	43758.1	34817.2	28448.9	68461.5
0.00_141.0101m/z	141.01	0.00231667	pos	Benzoyl chloride	72903	Unclassified	Unclassified	Unclassified	M+H	C7H5ClO	35	0.311	-0.441652	1.04354	3.42912e-06	9.83598e-05	0.414058	1.33243	74025.6	55556.9	75253.3	62995.7	74456.1	69096.8	75180.1	71538	84484.1	71465.8	81760.5	47281.2	50086.5	57390.4	55697.6	57533.8	53615.6	52984.9	65609.5	62512.1	52857.5
5.67_683.4763m/z	683.476	5.67293	pos	5-Hydroxymethyl tolterodine	HMDB0013973	Benzenoids	Benzene and substituted derivatives	Diphenylmethanes	2M+H	C22H31NO2	34.9	0	-2.79944	1.55963	9.93375e-08	6.00288e-06	3.23138	9.39164	43969.5	4681.77	40635.3	54557.7	24303.4	43383.6	49103.8	72769.6	31105.7	41347.1	38519.6	586.645	1724.42	4458.33	4229.3	4686.43	6341.13	6715.09	6274.47	4637.06	7164.87
9.60_543.3403m/z	543.34	9.59753	pos	1-(2-methoxy-6Z-heptadecenyl)-sn-glycero-3-phosphoserine	LMGP03060015	Lipids and lipid-like molecules	Glycerophospholipids	Glycerophosphoserines	M+NH4	C24H48NO9P	34.9	0	-0.39769	1.18801	0.0449579	0.125558	-2.41989	0.186871	10296	55097.1	10446.6	13114	7085.34	19899.8	7850.58	7187.33	11172.4	5164.29	10743.9	18471.7	8681.94	47624.1	11761	50088.2	49382.3	161388	174329	8681.01	20563.5
7.31_886.5560n	909.545	7.3079	pos	PI(20:2(11Z,14Z)/18:2(9Z,12Z))	HMDB0009877	Lipids and lipid-like molecules	Glycerophospholipids	Glycerophosphoinositols	M+Na, M+K	C47H83O13P	34.8	0	-1.31512	1.03493	0.000983461	0.00759485	1.52215	2.87218	34327.8	11951.8	36975.1	32021.4	36771.5	50240.3	36286	25540.3	44204.3	35790.8	11120	236.836	0.465453	9894.38	3.74188e-07	10883.3	3.74188e-07	24785.6	18055.9	15867.8	39794
15.99_226.9749m/z	226.975	15.9881	pos	oltipraz	96195	Unclassified	Unclassified	Unclassified	M+H	C8H6N2S3	34.7	3.83	-7.30752	1.1512	4.5618e-05	0.000752671	-1.14016	0.453709	19465.3	42902.7	19833.5	10056.5	12402.8	13836	21520.1	16570.6	12138.9	29288.3	39541.4	62190.1	50991.2	45250.1	47895.5	44749.1	36761.7	35038	38300.5	36619.2	31231.6
5.69_759.6401m/z	759.64	5.69057	pos	3-nonadecylphenol	LMPK15010006	Lipids and lipid-like molecules	Polyketides	Phenolic lipids	2M+K	C25H44O	34.7	0	-2.07405	1.65265	5.91324e-08	3.95206e-06	3.75494	13.5005	48160.5	3567.3	44443.2	62815.6	28244.5	36226.5	59504.9	75668.7	33402.8	50594	42543.7	880.828	3009.3	3330.68	1934.01	3538.5	3671.93	3976.02	4319.04	5029.11	5983.59
8.95_571.3489m/z	571.349	8.95353	pos	LysoPE(0:0/24:6(6Z,9Z,12Z,15Z,18Z,21Z))	HMDB0011499	Lipids and lipid-like molecules	Glycerophospholipids	Glycerophosphoethanolamines	M+NH4	C29H48NO7P	34.2	0	-3.22305	1.61994	4.15535e-06	0.000112856	-0.638201	0.642514	78418.3	122049	76606.4	84513.5	94044.1	88366.9	78889.7	92298.7	49262.9	77133.9	64648.8	122729	133456	113328	153518	117099	108833	134006	109918	109672	117932
3.48_223.0397n	241.074	3.47558	pos	Methyl 4-chloro-1H-indole-3-acetate	HMDB0032937	Organoheterocyclic compounds	Indoles and derivatives	Indolyl carboxylic acids and derivatives	M+H, M+NH4	C11H10ClNO2	34	0.0989	-1.30451	1.24298	4.44502e-06	0.000119161	-0.565241	0.675843	54226.4	80235.3	53505.5	51605.6	52343.9	50109.4	41872.2	49166.8	61334.6	54927.4	73172.5	92331.2	83652.4	80297.7	80691	81242.8	69711.3	83187.9	91208.4	66563.9	73466.6
14.15_300.0065m/z	300.006	14.1541	neg	Lamotrigine	HMDB0014695	Benzenoids	Benzene and substituted derivatives	Halobenzenes	M+FA-H	C9H7Cl2N5	33.4	0	1.64936	1.23885	1.51018e-08	1.50159e-06	0.406067	1.32507	99079.4	74773	101033	82525.9	101644	98688.2	100969	97420.1	107336	102544	99554.6	78653.4	75574.9	78726.5	76790.8	78143.2	70383.2	69263.7	73888.5	72683.4	73622.5
8.95_288.1344m/z	288.134	8.95353	pos	10,11-Dihydroxycarbamazepine	HMDB0060568	Organoheterocyclic compounds	Benzazepines	Dibenzazepines	M+NH4	C15H14N2O3	33.1	0	0.398735	1.11641	0.000247745	0.00274698	0.407356	1.32625	97395.3	73436.4	100248	116149	93547.3	112056	96119.3	108212	77992.2	89630.4	82603.2	54709.3	62239.2	69773.2	79082.3	72279.9	75416	88019.2	74628.1	77935	80282.1
6.04_930.0680m/z	930.068	6.04342	pos	3,7,11,15,18-pentamethyloctacosane	LMFA11000011	Lipids and lipid-like molecules	Fatty Acyls	Hydrocarbons	2M+H	C33H68	33	0	-3.72025	1.19604	0.000352191	0.00356941	-1.60914	0.327794	13870.8	42315.6	13954.9	19433.5	8738.85	11479.9	5545.15	28321	13386	18486.9	5490.92	17529.3	51352.7	37772.7	77956.1	41123.1	47858.5	57865.4	19617.1	37455.7	34625.3
14.42_196.0168m/z	196.017	14.4211	pos	m-Chlorohippuric acid	HMDB0001309	Benzenoids	Benzene and substituted derivatives	Benzoic acids and derivatives	M+H-H2O	C9H8ClNO3	32.8	0	3.60459	6.05477	7.75593e-06	0.000184099	-0.37276	0.772303	2.15764e+06	2.79378e+06	2.21513e+06	1.97132e+06	2.22783e+06	2.04912e+06	2.10478e+06	2.06017e+06	2.41439e+06	2.10326e+06	2.27281e+06	3.25621e+06	3.00019e+06	2.9262e+06	2.92719e+06	2.9166e+06	2.59281e+06	2.51882e+06	2.82258e+06	2.65879e+06	2.3184e+06
14.42_194.0215m/z	194.021	14.4211	pos	2-chloromuconic acid	LMFA01030967	Lipids and lipid-like molecules	Fatty Acyls	Fatty Acids and Conjugates	M+NH4	C6H5ClO4	32.5	0	-0.0659119	1.73378	3.92891e-06	0.000108535	-0.400606	0.75754	160377	211707	164935	145924	167404	153326	158888	150648	180235	156294	165736	247431	228968	222097	218686	221784	195503	191406	214658	200227	176314
14.32_213.9828m/z	213.983	14.3191	pos	Chloroxine	HMDB0015373	Organoheterocyclic compounds	Quinolines and derivatives	Haloquinolines	M+H	C9H5Cl2NO	32.4	11.7	3.16938	2.03094	0.000130242	0.00166864	-0.263612	0.833	389219	467249	399531	362611	404513	366619	384886	368881	432190	383497	400238	548022	492931	487452	484606	486398	437467	415245	463999	454353	402021
0.67_912.7785m/z	912.778	0.665383	pos	PC(23:0/23:0)	LMGP01011135	Lipids and lipid-like molecules	Glycerophospholipids	Glycerophosphocholines	M+H-H2O	C54H108NO8P	32.3	0	0.518701	1.03351	0.0194717	0.0685265	0.191752	1.14215	227799	199448	229469	196390	221901	235515	200525	224169	254234	251112	236878	219883	208329	192499	257712	198203	212020	187128	172569	182925	163212
3.43_361.0925n	362.1	3.42683	pos	Methoxyzotepine	3105	Unclassified	Unclassified	Unclassified	M+H-H2O, M+H	C19H20ClNO2S	32	0.659	6.0655	2.47731	0.000627251	0.00541812	-0.765144	0.588395	174302	296233	182303	175707	275220	195578	65566.4	130200	177361	214790	151990	310523	253447	306235	243184	314766	249035	331947	378489	172984	401718
0.67_908.7860n	909.802	0.665383	pos	TG(18:2(9Z,12Z)/18:2(9Z,12Z)/20:1(11Z))	HMDB0005473	Lipids and lipid-like molecules	Glycerolipids	Triradylcglycerols	M+H-H2O, M+H	C59H104O6	31.9	0	2.98527	1.24583	0.000141612	0.00178591	0.619135	1.53595	88403.9	57556.3	94142.6	76885.4	102439	68613.4	73256.9	87913.5	117405	88965.7	86013.7	68630	69235.4	61019.9	61512.6	63262.2	42226.6	69159.7	54028.5	55046.1	31442.2
9.09_557.3209m/z	557.321	9.08717	neg	29:2(5Z,9Z)(6Br)	LMFA01030891	Lipids and lipid-like molecules	Fatty Acyls	Fatty Acids and Conjugates	M+FA-H	C29H53BrO2	30.7	7.25	-0.347297	1.56437	0.00132726	0.00950113	-0.431608	0.741435	146621	197753	144701	182462	113805	170643	140106	183349	87118.6	182284	115122	201158	232330	184741	207572	189673	213217	201498	149836	205478	192027
9.97_815.6920m/z	815.692	9.9656	pos	TG(15:0/o-18:0/14:1(9Z))	HMDB0043807	Lipids and lipid-like molecules	Glycerolipids	Triradylcglycerols	M+K	C50H96O5	30.7	0	3.97113	1.1877	3.02283e-05	0.000545274	1.74705	3.35671	36937.3	11004	42716.4	41253.7	39811.2	33019.3	35031.5	29369.1	48721	34271	28242.5	3.74188e-07	3.74188e-07	9094.23	3.74188e-07	10003.7	3.74188e-07	28023.2	10498.2	18746.7	33674.1
14.15_275.0112m/z	275.011	14.1541	neg	4-Hydroxycyclophosphamide	HMDB0013856	Organic nitrogen compounds	Organonitrogen compounds	Nitrogen mustard compounds	M-H	C7H15Cl2N2O3P	30.4	1.51	-4.61313	1.85218	0.0103962	0.0440608	0.1705	1.12545	807515	717506	819097	644831	840502	773171	795701	785113	931241	792448	885533	701359	713074	771984	671070	765938	614372	730345	804148	723206	679560
8.95_547.2993m/z	547.299	8.95353	pos	PG(19:1(9Z)/0:0)	LMGP04050022	Lipids and lipid-like molecules	Glycerophospholipids	Glycerophosphoglycerols	M+Na	C25H49O9P	30.3	0	-2.54551	1.63764	0.0301262	0.0943672	0.345745	1.27081	357201	281082	365958	479290	265890	471969	336475	468946	257864	325665	242748	243214	251766	263385	297150	272875	263778	297073	262542	302525	356508
